# Supplementary material for: Risk factors for pulmonary tuberculosis recurrence, relapse and reinfection: a systematic review and meta-analysis
Source: PubMed Central journal article supplement — BMJ Open Respir Res. 2024 Mar 13;11(1):e002281. doi: 10.1136/bmjresp-2023-002281 (PMC10941165; doi:10.1136/bmjresp-2023-002281), 2024-03-13
Supplement: bmjresp-2023-002281supp001.pdf [file bmjresp-2023-002281supp001.pdf]

## Supplemental Material

Risk factors for pulmonary TB recurrence, relapse and reinfection: a systematic review and meta-analysis  
Vega V, Cabrera-Sanchez J, Rodríguez S, Verdonck K, Seas C, Otero L, Van der Stuyft P

### Appendix 1 PRISMA checklist

### Appendix 2 Search strategy

### Appendix 3 Quality assessment criteria using QUIPS-tool

### Appendix 4 Supplementary tables

Table S1: Characteristics of included studies

Table S2: Modelling methods for multivariate analysis

Table S3: Risk of bias assessment using QUIPS Tool for studies reporting undifferentiated recurrences

Table S4: Risk of bias assessment using QUIPS Tool for studies reporting relapses and reinfections

Table S5: Individual study risk factor estimates for undifferentiated recurrences

Table S6: Individual study risk factor estimates for relapses

Table S7: Individual study risk factor estimates for reinfections

Table S8: Summary table of adjusted estimates

Table S9: GRADE assessment of certainty of evidence

### Appendix 5 Supplementary figures

Figure S1 Forest plot Undifferentiated recurrence: Male sex (yes)

Figure S2 Forest plot Undifferentiated recurrence: Illiteracy (yes)

Figure S3 Forest plot Undifferentiated recurrence: Rural resident (vs urban)

Figure S4 Forest plot Undifferentiated recurrence: Smoking (yes)

Figure S5 Forest plot Undifferentiated recurrence: Alcohol consumption (yes)

Figure S6 Forest plot Undifferentiated recurrence: Cavitory disease (yes)

Figure S7 Forest plot Undifferentiated recurrence: Smear positivity at diagnosis (yes)

Figure S8 Forest plot Undifferentiated recurrence: Smear or culture positivity at 2 months treatment (yes)

Figure S9 Forest plot Undifferentiated recurrence: Previous TB episode (yes)

Figure S10 Forest plot Undifferentiated recurrence: Multidrug resistance (vs no resistance)

Figure S11 Forest plot Undifferentiated recurrence: Any drug resistance (yes)

Figure S12 Forest plot Undifferentiated recurrence: Advanced radiographical extent of TB disease

Figure S13 Forest plot Undifferentiated recurrence: Rifampicin less than 6 months vs 6 months

Figure S14 Forest plot Undifferentiated recurrence: Rifampicin more than 6 months vs 6 months

Figure S15 Forest plot Undifferentiated recurrence: Fixed-dose combination TB drug (yes)

Figure S16 Forest plot Undifferentiated recurrence: Low TB treatment adherence (yes)

Figure S7 Forest plot Undifferentiated recurrence: HIV infection (yes)

Figure S18 Forest plot Undifferentiated recurrence: Body mass index <18.5 (yes)

Figure S19 Forest plot Undifferentiated recurrence: Chronic lung disease (yes)

Figure S20 Forest plot Undifferentiated recurrence: Diabetes mellitus (yes)

Figure S21 Forest plot Relapses Male sex (yes)

Figure S22 Forest plot Relapses HIV infection (yes)

Figure S23 Forest plot Relapses Rifampicin less than six months

Figure S24 Forest plot Reinfections HIV infection (yes)

Figure S25 Funnel plot Undifferentiated recurrence: Male sex (yes)

Figure S26 Funnel plot Undifferentiated recurrence: Diabetes mellitus (yes)

Figure S27 Funnel plot Undifferentiated recurrence: Cavitory disease (yes)

Figure S28 Funnel plot Undifferentiated recurrence: HIV infection (yes)

Figure S29 Funnel plot Undifferentiated recurrence: Smoking (yes)

### Appendix 6 References of included articles

### Appendix 7 References of excluded articles by reasons

### Appendix 8 Individual study risk factor estimates

## Appendix 1 PRISMA Checklist

| Section and Topic             | Item # | Checklist item                                                                                                                                                                                                                                                                                       | Location where item is reported |
|-------------------------------|--------|------------------------------------------------------------------------------------------------------------------------------------------------------------------------------------------------------------------------------------------------------------------------------------------------------|---------------------------------|
| <b>TITLE</b>                  |        |                                                                                                                                                                                                                                                                                                      |                                 |
| Title                         | 1      | Identify the report as a systematic review.                                                                                                                                                                                                                                                          | Page 1                          |
| <b>ABSTRACT</b>               |        |                                                                                                                                                                                                                                                                                                      |                                 |
| Abstract                      | 2      | See the PRISMA 2020 for Abstracts checklist.                                                                                                                                                                                                                                                         | Page 2                          |
| <b>INTRODUCTION</b>           |        |                                                                                                                                                                                                                                                                                                      |                                 |
| Rationale                     | 3      | Describe the rationale for the review in the context of existing knowledge.                                                                                                                                                                                                                          | Page 3                          |
| Objectives                    | 4      | Provide an explicit statement of the objective(s) or question(s) the review addresses.                                                                                                                                                                                                               | Page 3                          |
| <b>METHODS</b>                |        |                                                                                                                                                                                                                                                                                                      |                                 |
| Eligibility criteria          | 5      | Specify the inclusion and exclusion criteria for the review and how studies were grouped for the syntheses.                                                                                                                                                                                          | Page 3                          |
| Information sources           | 6      | Specify all databases, registers, websites, organisations, reference lists and other sources searched or consulted to identify studies. Specify the date when each source was last searched or consulted.                                                                                            | Page 3                          |
| Search strategy               | 7      | Present the full search strategies for all databases, registers and websites, including any filters and limits used.                                                                                                                                                                                 | Appendix 2                      |
| Selection process             | 8      | Specify the methods used to decide whether a study met the inclusion criteria of the review, including how many reviewers screened each record and each report retrieved, whether they worked independently, and if applicable, details of automation tools used in the process.                     | Page 3-4                        |
| Data collection process       | 9      | Specify the methods used to collect data from reports, including how many reviewers collected data from each report, whether they worked independently, any processes for obtaining or confirming data from study investigators, and if applicable, details of automation tools used in the process. | Page 4                          |
| Data items                    | 10a    | List and define all outcomes for which data were sought. Specify whether all results that were compatible with each outcome domain in each study were sought (e.g. for all measures, time points, analyses), and if not, the methods used to decide which results to collect.                        | Page 4                          |
|                               | 10b    | List and define all other variables for which data were sought (e.g. participant and intervention characteristics, funding sources). Describe any assumptions made about any missing or unclear information.                                                                                         | Page 4                          |
| Study risk of bias assessment | 11     | Specify the methods used to assess risk of bias in the included studies, including details of the tool(s) used, how many reviewers assessed each study and whether they worked independently, and if applicable, details of automation tools used in the process.                                    | Page 4                          |
| Effect measures               | 12     | Specify for each outcome the effect measure(s) (e.g. risk ratio, mean difference) used in the synthesis or presentation of results.                                                                                                                                                                  | Page 4                          |
| Synthesis methods             | 13a    | Describe the processes used to decide which studies were eligible for each synthesis (e.g. tabulating the study intervention characteristics and comparing against the planned groups for each synthesis (item #5)).                                                                                 | Page 4                          |
|                               | 13b    | Describe any methods required to prepare the data for presentation or synthesis, such as handling of missing summary statistics, or data conversions.                                                                                                                                                | Page 4                          |
|                               | 13c    | Describe any methods used to tabulate or visually display results of individual studies and syntheses.                                                                                                                                                                                               | Page 4                          |
|                               | 13d    | Describe any methods used to synthesize results and provide a rationale for the choice(s). If meta-analysis was performed, describe the model(s), method(s) to identify the presence and extent of statistical heterogeneity, and software package(s) used.                                          | Page 4                          |
|                               | 13e    | Describe any methods used to explore possible causes of heterogeneity among study results (e.g. subgroup analysis, meta-regression).                                                                                                                                                                 | Page 4                          |
|                               | 13f    | Describe any sensitivity analyses conducted to assess robustness of the synthesized results.                                                                                                                                                                                                         | Not applicable                  |
| Reporting bias assessment     | 14     | Describe any methods used to assess risk of bias due to missing results in a synthesis (arising from reporting biases).                                                                                                                                                                              | Page 4                          |
| Certainty assessment          | 15     | Describe any methods used to assess certainty (or confidence) in the body of evidence for an outcome.                                                                                                                                                                                                | Page 4                          |
| <b>RESULTS</b>                |        |                                                                                                                                                                                                                                                                                                      |                                 |
| Study selection               | 16a    | Describe the results of the search and selection process, from the number of records identified in the search to the number of studies included in the review.                                                                                                                                       | Page 5                          |

| Section and Topic                              | Item # | Checklist item                                                                                                                                                                                                                                                                       | Location where item is reported |
|------------------------------------------------|--------|--------------------------------------------------------------------------------------------------------------------------------------------------------------------------------------------------------------------------------------------------------------------------------------|---------------------------------|
|                                                |        | ideally using a flow diagram.                                                                                                                                                                                                                                                        |                                 |
|                                                | 16b    | Cite studies that might appear to meet the inclusion criteria, but which were excluded, and explain why they were excluded.                                                                                                                                                          | Appendix 7                      |
| Study characteristics                          | 17     | Cite each included study and present its characteristics.                                                                                                                                                                                                                            | Appendix 6 – Table S1           |
| Risk of bias in studies                        | 18     | Present assessments of risk of bias for each included study.                                                                                                                                                                                                                         | Table S3 – S4                   |
| Results of individual studies                  | 19     | For all outcomes, present, for each study: (a) summary statistics for each group (where appropriate) and (b) an effect estimate and its precision (e.g. confidence/credible interval), ideally using structured tables or plots.                                                     | Table 1                         |
| Results of syntheses                           | 20a    | For each synthesis, briefly summarise the characteristics and risk of bias among contributing studies.                                                                                                                                                                               | Page 5                          |
|                                                | 20b    | Present results of all statistical syntheses conducted. If meta-analysis was done, present for each the summary estimate and its precision (e.g. confidence/credible interval) and measures of statistical heterogeneity. If comparing groups, describe the direction of the effect. | Page 5                          |
|                                                | 20c    | Present results of all investigations of possible causes of heterogeneity among study results.                                                                                                                                                                                       | Page 5-6                        |
|                                                | 20d    | Present results of all sensitivity analyses conducted to assess the robustness of the synthesized results.                                                                                                                                                                           | Not applicable                  |
| Reporting biases                               | 21     | Present assessments of risk of bias due to missing results (arising from reporting biases) for each synthesis assessed.                                                                                                                                                              | Page 6                          |
| Certainty of evidence                          | 22     | Present assessments of certainty (or confidence) in the body of evidence for each outcome assessed.                                                                                                                                                                                  | Page 6                          |
| <b>DISCUSSION</b>                              |        |                                                                                                                                                                                                                                                                                      |                                 |
| Discussion                                     | 23a    | Provide a general interpretation of the results in the context of other evidence.                                                                                                                                                                                                    | Page 6                          |
|                                                | 23b    | Discuss any limitations of the evidence included in the review.                                                                                                                                                                                                                      | Page 6                          |
|                                                | 23c    | Discuss any limitations of the review processes used.                                                                                                                                                                                                                                | Page 6                          |
|                                                | 23d    | Discuss implications of the results for practice, policy, and future research.                                                                                                                                                                                                       | Page 7                          |
| <b>OTHER INFORMATION</b>                       |        |                                                                                                                                                                                                                                                                                      |                                 |
| Registration and protocol                      | 24a    | Provide registration information for the review, including register name and registration number, or state that the review was not registered.                                                                                                                                       | Abstract – Page 2               |
|                                                | 24b    | Indicate where the review protocol can be accessed, or state that a protocol was not prepared.                                                                                                                                                                                       | Not applicable                  |
|                                                | 24c    | Describe and explain any amendments to information provided at registration or in the protocol.                                                                                                                                                                                      | Not applicable                  |
| Support                                        | 25     | Describe sources of financial or non-financial support for the review, and the role of the funders or sponsors in the review.                                                                                                                                                        | Page 8                          |
| Competing interests                            | 26     | Declare any competing interests of review authors.                                                                                                                                                                                                                                   | Page 8                          |
| Availability of data, code and other materials | 27     | Report which of the following are publicly available and where they can be found: template data collection forms; data extracted from included studies; data used for all analyses; analytic code; any other materials used in the review.                                           | Supplementary material          |

From: Page MJ, McKenzie JE, Bossuyt PM, Boutron I, Hoffmann TC, Mulrow CD, et al. The PRISMA 2020 statement: an updated guideline for reporting systematic reviews. *BMJ* 2021;372:n71. doi: 10.1136/bmj.n71

**Appendix 2 Search strategy****Search strategy PUBMED**

```

((((((((("tuberculosis"[MeSH Terms]) OR "tuberculosis"[Title/Abstract])) AND (((("recurrence"[MeSH Terms]) OR
recurren*[Tite/Abstract])) OR (((reinfection*[Title/Abstract] OR relapse*[Title/Abstract])) OR
"reactivation*[Title/Abstract]))) NOT (((("addresses"[Publication Type] OR "autobiography"[Publication Type] OR
"bibliography"[Publication Type] OR "book illustrations"[Publication Type] OR "case reports"[Publication Type] OR
"comment"[Publication Type] OR "dictionary"[Publication Type] OR "directory"[Publication Type] OR
"editorial"[Publication Type] OR "electronic supplementary materials"[Publication Type] OR "ephemera"[Publication Type]
OR "expression of concern"[Publication Type] OR "festschrift"[Publication Type] OR "government publications"[Publication
Type] OR "guideline"[Publication Type] OR "interactive tutorial"[Publication Type] OR "interview"[Publication Type] OR
"lectures"[Publication Type] OR "legal cases"[Publication Type] OR "legislation"[Publication Type] OR "letter"[Publication
Type] OR "news"[Publication Type] OR "newspaper article"[Publication Type] OR "patient education handout"[Publication
Type] OR "periodical index"[Publication Type] OR "personal narratives"[Publication Type] OR "pictorial works"[Publication
Type] OR "popular works"[Publication Type] OR "portraits"[Publication Type] OR "practice guideline"[Publication Type] OR
"technical report"[Publication Type] OR OR "video audio media"[Publication Type] OR "webcasts"[Publication Type])))
NOT Animals[Mesh:noexp])

```

Filters: Publication date from 1980/01/01; English; Spanish; French

**Cochrane Library**

"tuberculosis":ti,ab,kw AND "recurrence":ti,ab,kw or "relapse":ti,ab,kw or "reinfection":ti,ab,kw or "reactivation":ti,ab,kw

Filters: Publication date from 1980/01/01

**Scielo**

(ti:(tuberculosis) OR ab:(tuberculosis)) AND ((ti:(recurren\$) or ab:(recurren\$)) OR (ti:(reinfecci3n) or ab:(reinfecci3n)) OR (ab:(reca3da) OR ti:(reca3da)) OR (ti:(reactivaci3n) or ab:(reactivaci3n)))

**Lilacs**

(tw:((tw:((tw:("tuberculosis")) AND (tw:(reinfecci3n)) OR (tw:(recurren\*)) OR (tw:(reactivaci3n)) OR (tw:(reca3da)) AND (db:("LILACS"))))) NOT (type\_of\_study:("case\_reports")) AND (instance:"regional") AND (la:("es" OR "en"))

## Appendix 3 Quality assessment criteria using QUIPS-tool

| Domains                                    | Signaling items                                                                                                                                                                                                                                                                                                                                                                                                                                     | Risk of bias ratings                                                                                                                                                                                                                                                                                                                                                                            | Specific criteria used for this review                                                                                                                                                                                                                                                                                                                                                                                                                                                            |
|--------------------------------------------|-----------------------------------------------------------------------------------------------------------------------------------------------------------------------------------------------------------------------------------------------------------------------------------------------------------------------------------------------------------------------------------------------------------------------------------------------------|-------------------------------------------------------------------------------------------------------------------------------------------------------------------------------------------------------------------------------------------------------------------------------------------------------------------------------------------------------------------------------------------------|---------------------------------------------------------------------------------------------------------------------------------------------------------------------------------------------------------------------------------------------------------------------------------------------------------------------------------------------------------------------------------------------------------------------------------------------------------------------------------------------------|
| 1. Study participation                     | (a) Adequate participation in the study by eligible persons<br>(b) Description of the target population or population of interest<br>(c) Description of the baseline study sample<br>(d) Adequate description of the sampling frame and recruitment<br>(e) Adequate description of the period and place of recruitment<br>(f) Adequate description of inclusion and exclusion criteria                                                              | High: the relationship between the PF and outcome is very likely to be different for participants and eligible non-participants<br><br>Moderate: the relationship between the PF and outcome may be different for participants and eligible non-participants<br><br>Low: the relationship between the PF and outcome is unlikely to be different for participants and eligible non-participants | Eligible refers to successfully treated TB patients (cured or treatment completed).<br><br>We considered a cut-off of 2/3 of eligible participants for consider adequate participation.<br><br>Several studies only report characteristics of the treatment cohort and not of successfully treated TB patients. However, we did not consider this to have a major impact on the quality of the study. Lack of any description of participants was considered to downgrade quality in this domain. |
| 2. Study attrition                         | (a) Adequate response rate for study participants<br>(b) Description of attempts to collect information on participants who dropped out<br>(c) Reasons for loss to follow-up are provided<br>(d) Adequate description of participants lost to follow-up<br>(e) There are no important differences between participants who completed the study and those who did not                                                                                | High: the relationship between the PF and outcome is very likely to be different for completing and non-completing participants<br><br>Moderate: the relationship between the PF and outcome may be different for completing and non-completing participants<br><br>Low: the relationship between the PF and outcome is unlikely to be different for completing and non-completing participants | We considered a cut-off of 2/3 of completing participants for this domain.<br><br>In case the study has a greater percentage of lost to follow up, we downgrade the quality in this domain for those studies that lack of a description of lost to follow up participants.                                                                                                                                                                                                                        |
| 3. Prognostic factor measurement           | (a) A clear definition or description of the PF is provided<br>(b) Method of PF measurement is adequately valid and reliable<br>(c) Continuous variables are reported or appropriate cutpoints are used<br>(d) The method and setting of measurement of PF is the same for all study participants<br>(e) Adequate proportion of the study sample has complete data for the PF<br>(f) Appropriate methods of imputation are used for missing PF data | High: the measurement of the PF is very likely to be different for different levels of the outcome of interest<br><br>Moderate: the measurement of the PF may be different for different levels of the outcome of interest<br><br>Low: the measurement of the PF is unlikely to be different for different levels of the outcome of interest                                                    | We provided an overall evaluation for all risk factors evaluated in the study.<br>HIV and Diabetes mellitus diagnosis not being based on specified of laboratory methods was considered to decrease the quality                                                                                                                                                                                                                                                                                   |
| 4. Outcome measurement                     | (a) A clear definition of the outcome is provided<br>(b) Method of outcome measurement used is adequately valid and reliable<br>(c) The method and setting of outcome measurement is the same for all study participants                                                                                                                                                                                                                            | High: the measurement of the outcome is very likely to be different related to the baseline level of the PF<br><br>Moderate: the measurement of the outcome may be different related to the baseline level of the PF<br><br>Low: the measurement of the outcome is unlikely to be different related to the baseline level of the PF                                                             | We downgraded quality if recurrences were only or mostly based on clinical radiological TB diagnoses.<br><br>For relapses and reinfections, we considered a threshold of >88% for availability of genotyping for both episodes.                                                                                                                                                                                                                                                                   |
| 5. Adjustment for other prognostic factors | (a) All other important PFs are measured<br>(b) Clear definitions of the important PFs measured are provided                                                                                                                                                                                                                                                                                                                                        | High: the observed effect of the PF on the outcome is very likely to be distorted by another factor related to PF and outcome                                                                                                                                                                                                                                                                   | We considered as low risk of bias for those studies that adjust at minimum for age, sex and HIV.                                                                                                                                                                                                                                                                                                                                                                                                  |

| Domains                               | Signaling items                                                                                                                                                                                                                                                                                                                                                                     | Risk of bias ratings                                                                                                                                                                                                                                                                                          | Specific criteria used for this review                                          |
|---------------------------------------|-------------------------------------------------------------------------------------------------------------------------------------------------------------------------------------------------------------------------------------------------------------------------------------------------------------------------------------------------------------------------------------|---------------------------------------------------------------------------------------------------------------------------------------------------------------------------------------------------------------------------------------------------------------------------------------------------------------|---------------------------------------------------------------------------------|
|                                       | (c) Measurement of all important PFs is adequately valid and reliable<br>(d) The method and setting of PF measurement are the same for all study participants<br>(e) Appropriate methods are used to deal with missing values of PFs, such as multiple imputation<br>(f) Important PFs are accounted for in the study design<br>(g) Important PFs are accounted for in the analysis | Moderate: the observed effect of the PF on outcome may be distorted by another factor related to PF and outcome<br><br>Low: the observed effect of the PF on outcome is unlikely to be distorted by another factor related to PF and outcome                                                                  | In case the study did not perform multivariate analysis, we downgraded quality. |
| 6. Statistical analysis and reporting | (a) Sufficient presentation of data to assess the adequacy of the analytic strategy<br>(b) Strategy for model building is appropriate and is based on a conceptual framework or model<br>(c) The selected statistical model is adequate for the design of the study (d) There is no selective reporting of results                                                                  | High: the reported results are very likely to be spurious or biased related to analysis or reporting<br><br>Moderate: the reported results may be spurious or biased related to analysis or reporting<br><br>Low: the reported results are unlikely to be spurious or biased related to analysis or reporting |                                                                                 |
| Overall assesment                     | In order to provide and overall assessment of quality, we use the following criteria based on previous results<br><br>Good quality: Low risk of bias in all domains<br>Poor quality: High risk of bias in any of six domains<br>Fair quality: The study did not match criteria for good or poor quality                                                                             |                                                                                                                                                                                                                                                                                                               |                                                                                 |

Table adapted from: Riley R D, Moons K G M, Snell K I E, Ensor J, Hooft L, Altman D G et al. A guide to systematic review and meta-analysis of prognostic factor studies *BMJ* 2019; 364 :k4597 doi:10.1136/bmj.k4597

## Appendix 4 Supplementary tables

Table S1: Characteristics of included studies

| Authors (year)                       | Country (region or city)                                                        | Number of recurrences | Source of risk factor information | Length of follow up (years, unless specified) | Type of follow up* | Diagnostic method of recurrent episode                                  | Genotyping methods used and percentage availability of DNA samples for genotyping |
|--------------------------------------|---------------------------------------------------------------------------------|-----------------------|-----------------------------------|-----------------------------------------------|--------------------|-------------------------------------------------------------------------|-----------------------------------------------------------------------------------|
| <b>Clinical trials</b>               |                                                                                 |                       |                                   |                                               |                    |                                                                         |                                                                                   |
| Balasubramaniam et al (1990)         | India (Madras)                                                                  | 52                    | Trial database                    | 5                                             | Active             | Culture                                                                 |                                                                                   |
| Castelo et al (1989)                 | Brazil (Sao Paulo)                                                              | 27                    | Trial database                    | 1                                             | Active             | Culture                                                                 |                                                                                   |
| Chaulet et al (1995)                 | Algeria                                                                         | 1                     | Trial database                    | 2                                             | Active             | Culture                                                                 |                                                                                   |
| Combs et al (1990)                   | United States                                                                   | 16                    | Trial database                    | 96 weeks                                      | Active             | Clinical and radiological diagnosis or AFB smear microscopy and culture |                                                                                   |
| East and Central African/BMRC (1986) | Kenia, Zambia, Tanzania, Uganda                                                 | 24                    | Trial database                    | 2                                             | Active             | Clinical and radiological diagnosis or AFB smear microscopy and culture |                                                                                   |
| Fitzgerald et al (2000)              | Haiti (Port au Prince)                                                          | 15                    | Medical records                   | 1.5                                           | Passive            | Clinical and radiological diagnosis or AFB smear microscopy and culture |                                                                                   |
| Gillespie et al (2014)               | South Africa, India, Tanzania, Kenya, Thailand, Malaysia, Zambia, China, Mexico | 123                   | Trial database                    | 12-14 months                                  | Active             | Culture                                                                 |                                                                                   |
| Gopalan et al (2018) ‡               | India (Chennai, Vellore, and Madurai, south India)                              | 16                    | Trial database                    | 1                                             | Active             | AFB smear microscopy and culture                                        |                                                                                   |
| Hong Kong Chest Service (1982)       | China (Hong Kong)                                                               | 22                    | Trial database                    | 1.5                                           | Active             | Culture                                                                 |                                                                                   |
| Hong Kong TBRC / Madras BMRC (1991)  | Hong Kong, China                                                                | 17                    | Trial database                    | First treatment                               | 5 years            | Active                                                                  |                                                                                   |
| Jasmer Lorna et al (2004)            | United States and Canada                                                        | 81                    | Trial database                    | 2                                             | Active             | Culture                                                                 | RFLP, Polymorphic guanine-cytosine-rich sequence-based RFLP analysis (93%)        |
| Jawahar et al (2013)                 | India (Chennai and Madurai, South India)                                        | 40                    | Trial database                    | 2                                             | Active             | Clinical and radiological diagnosis or AFB smear microscopy and culture |                                                                                   |

|                                     |                                                                                        |     |                 |               |               |                                                                          |            |
|-------------------------------------|----------------------------------------------------------------------------------------|-----|-----------------|---------------|---------------|--------------------------------------------------------------------------|------------|
| Jindani et al (2014)                | South Africa, Zimbabwe, Botswana, and Zambia                                           | 38  | Trial database  | 4 months      | Active        | Culture                                                                  |            |
| Johnson et al (2000)                | Uganda (Kampala)                                                                       | 18  | Medical records | 2             | Active        | Clinical and radiological diagnosis and AFB smear microscopy and culture |            |
| Johnson et al (2009)                | Uganda, Brazil and Philippines.                                                        | 18  | Trial database  | 2             | Active        | Clinical and radiological diagnosis and microbiological diagnosis        | RFLP (89%) |
| Kennedy et al (1996)                | Tanzania (Kilimanjaro)                                                                 | 7   | Medical records | 0.5           | Active        | Clinical and radiological diagnosis or AFB smear microscopy and culture  |            |
| Lienhardt et al (2011)              | Africa, Asia, and Latin America                                                        | 42  | Trial database  | 12 months     | Active        | Culture                                                                  |            |
| Madras/BMRC (1989) **               | China (Hong Kong)                                                                      | 82  | Trial database  | 4.5           | Not specified | AFB smear microscopy and culture                                         |            |
| Merle et al (2014)                  | Cotonou, Benin; Conakry, Guinea; Nairobi, Kenya; Dakar, Senegal; Durban, South Africa. | 148 | Trial database  | 2             | Active        | Culture                                                                  |            |
| Nie et al (2021)                    | China                                                                                  | 34  | Trial database  | 1             | Active        | AFB smear microscopy and culture                                         |            |
| Parthasarathy et al (1991)          | India (Madras and Bangalore)                                                           | 85  | Trial database  | 2 after start | Active        | Culture                                                                  |            |
| Perriens et al (1995)               | Democratic Republic of the Congo (Kinshasa)                                            | 19  | Medical records | 0.5           | Passive       | AFB smear microscopy and culture                                         |            |
| Singapore/BMRC (1981)               | Singapore, China, Malay and India                                                      | 18  | Trial database  |               | Active        | Culture                                                                  |            |
| Singapore/BMRC (1988)               | Singapore                                                                              | 11  | Trial database  | 2             | Active        | Clinical and radiological diagnosis or AFB smear microscopy and culture  |            |
| Singapore/BMRC (1991)               | Singapore                                                                              | 10  | Trial database  | 1.5           | Active        | Culture                                                                  |            |
| Somner et al (1990)                 | Britain                                                                                | 10  | Trial database  |               | Not specified | AFB smear microscopy and culture                                         |            |
| Su et al (2001)                     | Taiwan (Taipei)                                                                        | 1   | Trial database  | 2             | Active        | Clinical and radiological diagnosis or AFB smear microscopy and culture  |            |
| Teo et al (1999)                    | Singapore                                                                              | 14  | Trial database  | 5             | Active        | Clinical and radiological diagnosis and AFB smear microscopy and culture |            |
| Tuberculosis Research Centre (1997) | India (Madurai)                                                                        | 65  | Trial database  | 2             | Not specified | AFB smear microscopy and culture                                         |            |
| Wu et al (2015)                     | Taiwan                                                                                 | 0   | Trial database  | 1             | Active        | Culture                                                                  |            |
| Zierski et al (1981)                | Poland                                                                                 | 54  | Trial database  | 2.5           | Not specified | AFB smear microscopy and culture                                         |            |



| <b>Prospective longitudinal studies</b> |                                    |     |                              |                       |                    |                                                                                                |                           |
|-----------------------------------------|------------------------------------|-----|------------------------------|-----------------------|--------------------|------------------------------------------------------------------------------------------------|---------------------------|
| Anaam et al (2019)                      | Yemen                              | 71  | TB registers                 | 5                     | Active             | AFB smear microscopy and culture                                                               |                           |
| Chaisson et al (1996)                   | Haiti (Cit  Soleil)                | 13  | Medical records; HIV testing | 3.5                   | Passive            | Clinical and radiological diagnosis and AFB smear microscopy and culture                       |                           |
| Chang et al (2004)                      | China (Hong Kong)                  | 113 | Medical records              | 2                     | Passive            | Clinical and radiological diagnosis and culture                                                |                           |
| Charalambous et al (2008) §             | South Africa (Free State Province) | 42  | TB registers/Medical records | 1.02 (Mean follow up) | Active             | Clinical and radiological diagnosis and AFB smear microscopy and culture                       | RFLP (38%)                |
| Connolly et al (1999)                   | South Africa (KwaZulu-Natal)       | 19  | HIV testing                  | 1.2 (Mean follow up)  | Passive and Active | AFB smear microscopy                                                                           |                           |
| Crampin et al (2010)                    | Malawi (Karonga)                   | 53  | TB registers                 | 10.8                  | Active             | Clinical and radiological diagnosis and AFB smear microscopy and culture                       | RFLP, Spoligotyping (79%) |
| Fox et al (2018)                        | Vietnam                            | 498 | Local TB registers/Interview | 2                     | Mixed              | AFB smear microscopy                                                                           |                           |
| Gupte et al (2021)                      | India and South Africa             | 39  | Medical records              | At First treatment    | 18 months          | Active                                                                                         |                           |
| Hang et al (2015)                       | Vietnam (Hanoi)                    | 30  | Structured questionnaire.    | 1.3                   |                    | AFB smear microscopy and culture                                                               |                           |
| Hawken et al (1993) ‡                   | Kenya (Nairobi)                    | 11  | TB registers/Medical records | 1.25                  | Active             | AFB smear microscopy and culture                                                               | RFLP (27%)                |
| Huyen et al (2013)                      | Vietnam (Mekong River Delta)       | 35  | TB registers/Medical records | 1.5                   | Active             | AFB smear microscopy and culture                                                               | Spoligotyping (100%)      |
| Jimenez Corona et al (2013)             | Mexico (Veracruz)                  | 74  | Medical records              | 5.14 (Mean follow-up) | Active             | AFB smear microscopy and culture                                                               | RFLP, Spoligotyping (51%) |
| Kassim et al (1995)                     | Nigeria (Abidjan)                  | 20  | Medical records              | 1.5                   | Active             | AFB smear microscopy, Clinically diagnosed extrapulmonary tuberculosis                         |                           |
| Kim et al 2021                          | Cheongju, South Korea              | 6   | Medical records              | 2014-2019             | Active             | Clinical-radiological, AFB smear microscopy or AFB smear culture                               |                           |
| Liu et al (2021)                        | China                              | 141 | Structured questionnaire     | 2                     | Active             | Clinical and radiological diagnosis and AFB smear microscopy, culture and Molecular genotyping | <u>WGS (27%)</u>          |

|                                           |                                                                              |     |                                           |                          |         |                                                                                                          |                                      |
|-------------------------------------------|------------------------------------------------------------------------------|-----|-------------------------------------------|--------------------------|---------|----------------------------------------------------------------------------------------------------------|--------------------------------------|
| Mave et al (2021)                         | India (Pune)                                                                 | 19  | Medical records                           | 1                        | Active  | Clinical-radiological, AFB smear microscopy, AFB smear culture, Molecular (Genotype, Xpert, Xpert Ultra) |                                      |
| Perriens et al (1991)                     | Democratic Republic of the Congo                                             | 20  | HIV surveys                               | 1                        | Passive | Clinical and radiological diagnosis and AFB smear microscopy and culture                                 |                                      |
| Pettit et al (2011)                       | United States of America (Tennessee)                                         | 20  | National TB registers/Medical records     | 1                        | Passive | Non specified                                                                                            | RFLP, Spoligotyping, MIRU VNTR (75%) |
| Pulido et al (1997) ‡                     | Spain (Madrid)                                                               | 15  | Medical records                           | 2.63 (Mean follow up)    | Passive | AFB smear microscopy and culture                                                                         |                                      |
| Shen et al (2017)                         | China (Shanghai)                                                             | 710 | Local TB registers                        | 2000-2012                | Passive | Culture                                                                                                  | MIRU VNTR (20%)                      |
| Sonnenberg et al (2001) §                 | South Africa (Gauteng)                                                       | 65  | TB registers/Medical records              | 2.09 ( Mean follow up)   | Active  | Culture                                                                                                  | RFLP (60%)                           |
| Suryanto et al (2008)                     | Indonesia (South Sulawesi)                                                   | 12  | Study records                             | 4.3 years from treatment | Active  | Clinical and radiological diagnosis and AFB smear microscopy and culture                                 |                                      |
| Thomas et al (2005)                       | India (Tamil Nadu)                                                           | 62  | TB registers/Medical records              | 1.5                      | Active  | AFB smear microscopy and culture                                                                         |                                      |
| Thomas et al (2019)                       | India (Chennai and Pune)                                                     | 20  | Interview                                 | 2                        | Active  | Clinical and radiological diagnosis and AFB smear microscopy and culture                                 |                                      |
| Velayutham et al (2018)                   | India (Tamil Nadu, Karnataka, Delhi, Maharashtra, Madhya Pradesh and Kerala) | 158 | Medical record/patient interview.         | 1                        | Active  | AFB smear microscopy and culture                                                                         |                                      |
| Vree et al (2007)                         | Northern Vietnam                                                             | 21  | Structured questionnaire and TB registers | 1.62 (Mean follow up)    | Active  | AFB smear microscopy                                                                                     |                                      |
| Westerlund et al (2015)                   | Peru (Lima)                                                                  | 58  | Questionnaires                            | 10                       | Active  | Not specified                                                                                            |                                      |
| <b>Retrospective longitudinal studies</b> |                                                                              |     |                                           |                          |         |                                                                                                          |                                      |
| Cudahy et al (2020)                       | South Africa (KwaZulu-Natal)                                                 | 35  | Medical records                           | 6                        | Passive | AFB smear microscopy, AFB smear culture and Molecular (Genotype, Xpert, Xpert Ultra)                     | MIRU-VNTR (88%)                      |
| Dangisso et al (2018)                     | Ethiopia (Dale and Yirgalem)                                                 | 101 | Medical records                           | 2002-2013                | Active  | The term TB recurrence was used to describe a recorded (on TB registry) re-diagnosis of                  |                                      |

|                              |                                          |      |                                 |                            |         |                                                                                                       |                   |
|------------------------------|------------------------------------------|------|---------------------------------|----------------------------|---------|-------------------------------------------------------------------------------------------------------|-------------------|
|                              |                                          |      |                                 |                            |         | TB after successful completion of DOTS. We confirmed the re-diagnosis through interview.              |                   |
| Datiko et al (2009)          | Ethiopia (Dale and Wonsho, Sidama)       | 15   | TB registers/Medical records    | 1998-2006                  | Active  | AFB smear microscopy                                                                                  |                   |
| Franke et al (2012) ¶        | Peru (Lima)                              | 26   | Medical records                 | 3.3 y (Mean follow up)     | Active  | Culture                                                                                               |                   |
| Jiang et al (2022)           | China                                    | 7143 | Medical records                 | 2005–2018                  | Passive | Clinical and radiological diagnosis and AFB smear microscopy, culture and Molecular (Genotype, Xpert) |                   |
| Jo et al (2014)              | South Korea (Seoul)                      | 6    | Medical records                 | 1                          | Passive | Clinical and radiological diagnosis and AFB smear microscopy and culture                              |                   |
| Luzze et al (2013)           | Uganda (Kampala)                         | 171  | Medical records                 | 1.24 (Mean follow-up)      | Active  | Culture                                                                                               | RFLP (57%)        |
| Ma et al (2018) ¶¶           | Beijing (China)                          | 16   | Medical records                 | 3                          | Active  | AFB smear microscopy and culture                                                                      |                   |
| Marx et al (2014)            | South Africa (Cape Town)                 | 203  | Local TB registers              | 1996-2008                  | Passive | AFB smear microscopy and culture                                                                      | RFLP. / WGS (64%) |
| Moreno-Martinez et al (2007) | Mexico (Soconusco, Chiapas)              | 39   | Standardisez questionnaire      | 1                          | Passive | AFB smear microscopy and culture                                                                      |                   |
| Nahid et al (2007)           | United States of America (San Francisco) | 16   | Medical records                 | 1                          | Passive | Culture                                                                                               |                   |
| Nettles et al (2004)         | United States of America (Baltimore)     | 14   | Local TB registers              | 1                          | Active  | Culture                                                                                               |                   |
| Picon et al (2007)           | Brazil (Rio Grande do Sul, Porto Alegre) | 26   | Local TB registers              | 7.7 years (Mean follow-up) | Passive | AFB smear microscopy and culture                                                                      |                   |
| Ruan et al (2021)            | China (Hangzhou City)                    | 479  | National TB registers           | Median 1565 days           | Passive | Clinical-radiological, AFB smear microscopy or AFB smear culture                                      | RFLP and WGS      |
| Sun et al (2017)             | China (Henan Province)                   | 69   | Interview and medical records   | 9                          | Passive | AFB smear microscopy and culture                                                                      |                   |
| Wang et al (2015) ‡ ¶¶       | Taiwan                                   | 18   | TB registry and medical records | 2                          | Passive | AFB smear microscopy and culture                                                                      |                   |
| Wu et al (2015)              | China (Changning, Shanghai)              | 7    | Medical records                 | 5 years                    | Passive | Clinical and radiological diagnosis and AFB smear microscopy and culture                              |                   |
| <b>Case-control studies</b>  |                                          |      |                                 |                            |         |                                                                                                       |                   |

|                              |                                                             |     |                                 |           |               |                                                                          |           |
|------------------------------|-------------------------------------------------------------|-----|---------------------------------|-----------|---------------|--------------------------------------------------------------------------|-----------|
| Ahmad-Khan et al (2016)      | Pakistan (Rawalpindi)                                       | 166 | Interview                       | 2005-2006 | NA            | Clinical and radiological diagnosis and AFB smear microscopy             |           |
| Eksombatchai et al (2022)    | Republic of Korea                                           |     | National TB registers           | 2006-2008 | NA            | Clinical and radiological diagnosis and AFB smear microscopy             |           |
| ElSahly et al (2004)         | United States of America (Houston and Harris County, Texas) | 100 | TB registers/Medical records    | 1995-2000 | NA            | Non specified                                                            |           |
| Faustini et al (2008)        | Italy (Lazio region)                                        | 20  | TB registry and medical records | 6 y       | NA            | Clinical and radiological diagnosis and AFB smear microscopy and culture |           |
| Lee et al (2014)             | Taiwan                                                      | 300 | Local TB registers              | 3 – 4 y   | NA            | AFB smear microscopy and culture                                         |           |
| Pillay et al (2021)          | South Africa (KwaZulu-Natal)                                | 139 | Trial database                  | 4 years   | Non specified | Non specified                                                            |           |
| Racil et al (2012)           | Tunisia                                                     | 64  | Not specified                   | 1995-2007 | NA            | Not specified                                                            |           |
| Tian et al (2014)            | China (Tian and Han Region)                                 | 480 | Medical records                 | 12 y      | NA            | Not specified                                                            |           |
| <b>Systematic review</b>     |                                                             |     |                                 |           |               |                                                                          |           |
| Romanowski et al (2018)      | Multicentric RCT                                            |     | Trial records                   | 1.5-2Y    | Active        | AFB smear microscopy and culture                                         | MIRU VNTR |
| <b>Cross sectional study</b> |                                                             |     |                                 |           |               |                                                                          |           |
| William et al (2021)         | Indonesia                                                   | 5   | Medical records                 | 2015-2018 | NA            | Clinical-radiological, AFB smear microscopy or AFB smear culture         |           |

\* active: patients were followed up to determine the presence or absence of a recurrent TB episode

passive: routine TB register based; patients self-present at health facilities

† For case control studies, the study period when recurrences were identified is provided

‡ HIV positive population

§ Gold miners

¶ MDR patients

|| Diabetes

\*\*Smear negative

**Table S2:** Modelling methods for multivariate analysis

| Authors                      | Modelling method for regression. | Method for selection of risk factors for inclusion in multivariable modelling.                     | Method for inclusion or exclusion of risk factors | Criteria used for inclusion or exclusion | Set of variables adjusted for                                                                                                                                                            |
|------------------------------|----------------------------------|----------------------------------------------------------------------------------------------------|---------------------------------------------------|------------------------------------------|------------------------------------------------------------------------------------------------------------------------------------------------------------------------------------------|
| Ahmad-Khan et al (2016)      | Not specified                    | preselection of established risk factors                                                           | Not specified                                     | Not specified                            | Age                                                                                                                                                                                      |
| Anaam et al (2019)           | Logistic                         | retain only those significant from univariable analysis                                            | Full model approach                               | P-value (<0.1)                           | Literate, Unemployment, Smoking, Khat chewing , Cavitation, Weight, Diabetes, Non Adherence                                                                                              |
| Chang et al (2004)           | Conditional logistic             | preselection of established risk factors                                                           | Forward                                           | Not specified                            | Treatment-related Factors, Sex, Age, Socio-demographic factors, type and extend of TB disease                                                                                            |
| Charalambous et al (2008)    | Cox                              | preselection of established risk factors                                                           | Not specified                                     | Likelihood ratio                         | Silicosis, age and HIV status.                                                                                                                                                           |
| Crampin et al (2010)         | Poisson                          | preselection of established risk factors                                                           | Not specified                                     | No aplica (si no excluye/incluye)        | Age, sex, time-band                                                                                                                                                                      |
| Dangisso et al (2018)        | Cox                              | retain only those significant from univariable analysis                                            | Full model approach                               | P-value (<0.2)                           | Age group, Residence, Treatment category, Education, Wealth index                                                                                                                        |
| Picon et al (2007)           | Cox                              | retain only those significant from univariable analysis                                            | Full model approach                               | P-value (<0.2)                           | HIV-positivity , Treatment compliance                                                                                                                                                    |
| ElSahly et al (2004)         | Logistic                         | retain only those significant from univariable analysis + preselection of established risk factors | Full model approach                               | P-value (<0.2)                           | Foreign born, Unemployment, Not married, Use of public transportation, Pulmonary disease on first episode, use of DOT on first episode, HIV/AIDS diagnosis and having a family physician |
| Faustini et al (2008)        | Logistic                         | retain only those significant from univariable analysis                                            | Full model approach                               | P-value (<0.1)                           | Gender, Foreign status , Residence , Length of therapy, TB site and modified therapy                                                                                                     |
| Fitzgerald et al (2000)      | Cox                              | Not specified                                                                                      | Not specified                                     | Not specified                            | age and duration of tuberculosis symptoms                                                                                                                                                |
| Fox et al (2018)             | Cox                              | preselection of established risk factors+ retain only those significant from univariable analysis  | Not specified                                     | -                                        | Age, gender, hemoptysis, HIV status, prior TB, self-reported drug-resistant TB, interaction between age and gender, and clustering at the district level.                                |
| Franke et al (2012)          | Cox                              | retain only those significant from univariable analysis                                            | Forward                                           | p<=0.1 and 10% change                    | Baseline, resistance to at least 5 drugs, age and XDR tuberculosis diagnosis                                                                                                             |
| Hang et al (2015)            | Cox                              | Not specified                                                                                      | Not specified                                     | Not specified                            | Resistance to SM, RMP, and INH, MTB strains (ancient Beijing, modern Beijing and others)                                                                                                 |
| Hawken et al (1993)          | Poisson                          | all candidate risk factors considered                                                              | Full model approach                               | Likelihood ratio test.                   | Age                                                                                                                                                                                      |
| Huyen et al (2013)           | Cox                              | retain only those significant from univariable analysis                                            | Not specified                                     | P-value (P < 0.05)                       | History of TB treatment, Previously treated , M. tuberculosis genotype, drug resistance                                                                                                  |
| Jimenez Corona et al (2013)  | Cox                              | preselection of established risk factors+ retain only those significant from univariable analysis  | Forward                                           | P-value (p < 0.20)                       | “relevant confounding factors”                                                                                                                                                           |
| Jo et al (2014)              | Logistic                         | retain only those significant from univariable analysis                                            | Not specified                                     | P-value (P < 0.05)                       | Age, sex, BMI, Diabetes mellitus, type and extend of disease.                                                                                                                            |
| Johnson et al (2009)         | Cox                              | retain only those significant from univariable analysis                                            | Backward                                          | P-value (<0.05)                          | Sex, age, type and extent of disease, treatment related factors, body mass index, hemoglobin.                                                                                            |
| Lee et al (2014)             | Conditional logistic regression  | preselection of established risk factors                                                           | Forward                                           | Not specified                            | “all potential risk factors for TB based on literature review“                                                                                                                           |
| Luzze et al (2013)           | Cox                              | all candidate risk factors considered                                                              | Not specified                                     | Not specified                            | HIV and other risk factors                                                                                                                                                               |
| Moreno-Martinez et al (2007) | Logistic                         | Unclear                                                                                            | Forward                                           | Not specified                            | Sex                                                                                                                                                                                      |

|                                           |               |                                                                                                   |                     |                                                      |                                                                                                                                                                         |
|-------------------------------------------|---------------|---------------------------------------------------------------------------------------------------|---------------------|------------------------------------------------------|-------------------------------------------------------------------------------------------------------------------------------------------------------------------------|
| Pettit et al (2011)                       | Logistic      | all candidate risk factors considered                                                             | Not specified       | Not specified                                        | All covariates in the table were included in the disease risk score except for the exposure of interest and tobacco use, due to collinearity with chronic lung disease. |
| Pulido et al (1997)                       | Cox           | retain only those significant from univariable analysis                                           | Not specified       | P-value ( $\leq 0.1$ )                               | Not specified                                                                                                                                                           |
| Racil et al (2012)                        | Not specified | Not specified                                                                                     | Not specified       | Not specified                                        | Not specified                                                                                                                                                           |
| Shen et al (2017)                         | Cox           | preselection of established risk factors + retain significant values                              | Full model approach | p values less than 0.2 from the univariable analysis | Sex, age, treatment history and drug resistance profiles                                                                                                                |
| Sonnenberg et al (2001)                   | Cox           | all candidate risk factors considered                                                             | Forward             | Not specified                                        | “age and other risk factors “                                                                                                                                           |
| Sun et al (2017)                          | Cox           | preselection of established risk factors + retain significant values                              | Not specified       | P-value ( $< 0.05$ )                                 | Male sex, Age, Drug resistance, Education and Income                                                                                                                    |
| Thomas et al (2005)                       | Logistic      | retain only those significant from univariable analysis                                           | Forward             | Not specified                                        | Drug regularity, DST profile, Smoking                                                                                                                                   |
| Thomas et al (2019)                       | Poisson       | preselection of established risk factors                                                          | Not specified       | Not specified                                        | Age, BMI, family income, HIV coinfection, diabetes, chest x-ray cavity and smear.                                                                                       |
| Tian et al (2014)                         | Logistic      | retain only those significant from univariable analysis                                           | Forward             | P-value ( $p < 0.25$ or $HR > 1.5$ )                 | Smoking, Alcoholism, HIV positive, COPD, Diabetes mellitus, Immunosuppressor treatment, Malnutrition, Use of DOTS on first episode                                      |
| Velayutham et al (2018)                   | Poisson       | all candidate risk factors considered                                                             | Full model approach | Not specified                                        | Smoking, BMI $<16$ , Alcohol, Missed doses in Intensive phase of treatment $>12$ , Diabetes mellitus, Respiratory symptom at end of treatment                           |
| Wang et al (2015)                         | Cox           | retain only those significant from univariable analysis                                           | Stepwise            | P-value ( $< 0.15$ )                                 | Age, sex, year of TB diagnosis, diabetes related factors, culture positivity after 2 months of treatment, duration of anti-TB treatment, adherence                      |
| Westerlund et al (2015)                   | Cox           | preselection of established risk factors                                                          | Forward             | Likelihood ratio test                                | Sex, MDR-TB, HIV and smoking, other respiratory diseases, age and BMI, treatment delay, and diabetes                                                                    |
| Ruan et al (2021)                         | Cox           | preselection of established risk factors                                                          | Not specified       | Not specified                                        | Sex, age, cavitation, sputum positive at 2mo and prolonged treatment                                                                                                    |
| Pillay et al (2021)                       | Cox           | preselection of established risk factors                                                          | Not specified       | Not specified                                        | WHO stage of the disease, BMI, lung cavities, age, CD4 count, VL, gender and previous history of TB                                                                     |
| Patrick George Tobias Cudahy et al (2020) | Cox           | all candidate risk factors considered                                                             | Not specified       | Not specified                                        | M. tuberculosis heterogeneity, HIV, age, education, marital status, and AFB sputum smear grade                                                                          |
| Mave et al (2021)                         | Cox           | all candidate risk factors considered                                                             | Not specified       | Not specified                                        | Sex, age, household income, smoking, alcohol, body mass index, daily vs intermittent TB regimen, and smear grade                                                        |
| Liu et al (2021)                          | Logistic      | preselection of established risk factors+ retain only those significant from univariable analysis | Not specified       | P-value ( $< 0.01$ )                                 | Patient age, sex, bilateral cavitation, treatment history, smoking, and occupation.                                                                                     |
| Jiang et al (2022)                        | Cox           | all candidate prognostic factors considered                                                       | Full model approach | Not specified                                        | Sex, age, occupation and all the other variables in table.                                                                                                              |

Table S3: Risk of bias assessment using QUIPS Tool for studies reporting undifferentiated recurrences

| Study                                | Study participation | Study attrition | Risk factor measurement | Outcome measurement | Adjustment for other risk factors | Statistical analysis and reporting | Overall assessment |
|--------------------------------------|---------------------|-----------------|-------------------------|---------------------|-----------------------------------|------------------------------------|--------------------|
| Ahmad Khan et al (2016)              | Low                 | NA              | Low                     | Low                 | Low                               | Low                                | Good               |
| Anaam et al (2019)                   | Low                 | Moderate        | Low                     | Low                 | Moderate                          | Low                                | Fair               |
| Balasubramanian et al (1990)         | Low                 | Low             | Low                     | Low                 | Low                               | Low                                | Good               |
| Castelo et al (1989)                 | Low                 | High            | Low                     | Low                 | Low                               | Low                                | Poor               |
| Chaisson et al (1996)                | Low                 | Moderate        | Low                     | Moderate            | High                              | High                               | Poor               |
| Chang et al (2004)                   | Low                 | Low             | Low                     | Moderate            | Low                               | Low                                | Fair               |
| Charalambous et al (2008)            | Moderate            | Moderate        | Low                     | Low                 | Low                               | Low                                | Fair               |
| Chalet et al (1995)                  | Low                 | Low             | Low                     | Low                 | Low                               | Low                                | Good               |
| Combs et al (1990)                   | Low                 | High            | Low                     | Low                 | High                              | High                               | Poor               |
| Connolly et al (1999)                | Low                 | Low             | Low                     | Low                 | High                              | High                               | Poor               |
| Crampin et al (2010)                 | Moderate            | Moderate        | Low                     | Moderate            | Low                               | Moderate                           | Fair               |
| Cudahy et al (2020)                  | Low                 | Low             | Moderate                | Low                 | Low                               | Low                                | Fair               |
| Dangisso et al (2018)                | Low                 | Low             | Low                     | Moderate            | High                              | Low                                | Poor               |
| Datiko et al (2009)                  | Low                 | Low             | Low                     | Low                 | High                              | Low                                | Poor               |
| East and Central African/BMRC (1986) | Low                 | Low             | Low                     | Low                 | Low                               | Low                                | Good               |
| Eksombatchai et al (2022)            | Low                 | NA              | Low                     | Low                 | Low                               | Low                                | Good               |
| El Sahly et al (2004)                | Low                 | NA              | Moderate                | Low                 | Moderate                          | Low                                | Fair               |
| Faustini et al (2008)                | Low                 | NA              | Moderate                | Low                 | Low                               | Low                                | Fair               |
| Fitzgerald et al (2000)              | Low                 | Moderate        | Low                     | Moderate            | High                              | Low                                | Poor               |
| Fox et al (2018)                     | Low                 | Low             | Low                     | Low                 | Low                               | Low                                | Good               |
| Franke et al (2012)                  | Low                 | Low             | Moderate                | Moderate            | Moderate                          | Moderate                           | Fair               |
| Gopalan et al (2018)                 | Low                 | Low             | Low                     | Low                 | Low                               | Low                                | Good               |
| Gupte et al (2021)                   | Low                 | NA              | Low                     | Low                 | Low                               | Low                                | Good               |
| Hang et al (2015)                    | Low                 | Moderate        | Low                     | Low                 | Low                               | Moderate                           | Fair               |
| Hawken et al (1993)                  | Low                 | Moderate        | Moderate                | Low                 | Moderate                          | Moderate                           | Fair               |

|                                     |          |          |          |          |          |          |      |
|-------------------------------------|----------|----------|----------|----------|----------|----------|------|
| Hong Kong Chest Service (1982)      | Low      | Low      | Low      | Low      | Low      | Low      | Good |
| Hong Kong TBRC / Madras BMRC (1991) | Low      | Low      | Low      | Low      | Low      | Low      | Good |
| Huyen et al (2013)                  | Low      | Low      | Low      | Low      | Moderate | Low      | Fair |
| Jasmer Lorna et al (2004)           | Low      | Moderate | Low      | Low      | High     | Low      | Poor |
| Jawahar et al (2013)                | Low      | Low      | Low      | Low      | Low      | Low      | Good |
| Jiang et al (2022)                  | Low      | Low      | Low      | Moderate | Moderate | Low      | Fair |
| Jimenez Corona et al (2013)         | Low      | Moderate | Low      | Low      | Moderate | Low      | Fair |
| Jo et al (2014)                     | Low      | High     | Moderate | Moderate | Moderate | Moderate | Poor |
| Johnson et al (2000)                | Low      | Low      | Low      | Low      | High     | High     | Poor |
| Kassim et al (1995)                 | Moderate | Moderate | Low      | Low      | High     | High     | Poor |
| Kennedy et al (1996)                | Low      | Low      | Low      | Low      | High     | High     | Poor |
| Kim et al (2021)                    | Low      | Low      | Low      | Moderate | High     | High     | Poor |
| Lienhard et al (2011)               | Low      | Low      | Low      | Low      | Low      | Low      | Good |
| Liu et al (2021)                    | Low      | Moderate | Low      | Low      | Moderate | Low      | Fair |
| Luzze et al (2013)                  | Low      | Moderate | Low      | Low      | Low      | Low      | Fair |
| Ma et al (2018)                     | Low      | Low      | Low      | Low      | High     | High     | Poor |
| Madras BMRC (1989)                  | Low      | Low      | Low      | Low      | Low      | Low      | Good |
| Marx et al (2014)                   | Low      | Moderate | Low      | Low      | High     | Low      | Poor |
| Mave et al (2021)                   | Low      | Low      | Low      | Moderate | Low      | Moderate | Fair |
| Merle et al (2014)                  | Low      | Low      | Low      | Low      | Low      | Low      | Good |
| Moreno Martinez et al (2009)        | Low      | Moderate | Low      | Low      | High     | High     | Poor |
| Nahid et al (2007)                  | Low      | Moderate | Low      | Low      | High     | High     | Poor |
| Nettles et al (2004)                | Low      | Moderate | Low      | Low      | High     | High     | Poor |
| Nie et al (2021)                    | Low      | Low      | Low      | Low      | Low      | Low      | Good |
| Parthasarathy et al (1991)          | Low      | Low      | Low      | Low      | Low      | Low      | Good |
| Perriens et al (1991)               | Low      | Moderate | Low      | Low      | High     | High     | Poor |
| Perriens et al (1995)               | Low      | Moderate | Low      | Low      | High     | High     | Poor |
| Pettit et al (2011)                 | Low      | Low      | Low      | Moderate | Low      | Low      | Fair |



|                                     |          |          |          |          |          |          |      |
|-------------------------------------|----------|----------|----------|----------|----------|----------|------|
| Picon et al (2007)                  | Low      | Moderate | Moderate | Low      | Low      | Low      | Fair |
| Pillay et al (2021)                 | Low      | Na       | Low      | High     | Low      | Low      | Poor |
| Pin Hui Lee et al (2014)            | Low      | NA       | Moderate | Low      | High     | High     | Poor |
| Pulido et al (1997)                 | Low      | Low      | Low      | Low      | Low      | Low      | Good |
| Racil et al (2012)                  | Low      | NA       | Moderate | Moderate | Moderate | High     | Poor |
| Ruan et al (2021)                   | Low      | Low      | Low      | Low      | High     | Moderate | Poor |
| Shen et al (2017)                   | Low      | Moderate | Low      | Low      | Low      | Low      | Fair |
| Singapore/BMRC (1981)               | Low      | Low      | Low      | Low      | Low      | Low      | Good |
| Singapore/BMRC (1988)               | Low      | Low      | Low      | Low      | Low      | Low      | Good |
| Singapore/BMRC (1991)               | Low      | Low      | Low      | Low      | Low      | Low      | Good |
| Somner et al (1980)                 | Low      | Low      | Low      | Low      | Low      | Low      | Good |
| Sonnenberg et al (2001)             | Low      | Low      | Low      | Low      | Low      | Low      | Good |
| Su et al (2002)                     | Low      | Moderate | Low      | Low      | Low      | Low      | Fair |
| Sun et al (2017)                    | Low      | Low      | Low      | Moderate | Low      | Low      | Fair |
| Suryanto et al (2008)               | Low      | Low      | Low      | Moderate | Low      | Low      | Fair |
| Teo et al (1999)                    | Low      | Low      | Low      | Low      | Low      | Low      | Good |
| Thomas et al (2004)                 | Moderate | Low      | Moderate | Low      | High     | Low      | Poor |
| Thomas et al (2019)                 | High     | High     | Low      | Moderate | Low      | Low      | Poor |
| Tian et al (2014)                   | Low      | NA       | Low      | Moderate | Low      | Low      | Fair |
| Tuberculosis Research Centre (1997) | Low      | Low      | Low      | Low      | Low      | Low      | Good |
| Velayutham et al (2018)             | Low      | Low      | Low      | Moderate | Low      | Low      | Fair |
| Vree et al (2007)                   | Low      | Low      | Moderate | Low      | High     | High     | Poor |
| Wang et al (2015)                   | Low      | Low      | Low      | Moderate | Low      | Low      | Fair |
| Westerlund et al (2015)             | Low      | Low      | Low      | Moderate | Low      | Low      | Fair |
| William et al (2021)                | Low      | High     | Low      | High     | High     | High     | Poor |
| Wu et al (2015)                     | Low      | Low      | Low      | Low      | Low      | Low      | Good |
| Wu et al (2016)                     | Low      | Low      | Moderate | Moderate | High     | High     | Poor |
| Zierski et al (1981)                | Low      | Low      | Low      | Low      | Low      | Low      | Good |

NA: Study attrition domain was not applicable for case control studies.

Table S4: Risk of bias assessment using QUIPS Tool for studies reporting relapses and reinfections

| <b>Study</b>                | <b>Study participation</b> | <b>Study attrition</b> | <b>Risk factor measurement</b> | <b>Outcome measurement</b> | <b>Adjustment for other risk factors</b> | <b>Statistical analysis and reporting</b> | <b>Overall assessment</b> |
|-----------------------------|----------------------------|------------------------|--------------------------------|----------------------------|------------------------------------------|-------------------------------------------|---------------------------|
| Charalambous et al (2008)   | Low                        | Moderate               | Low                            | High                       | High                                     | Low                                       | Poor                      |
| Crampin et al (2010)        | Moderate                   | Moderate               | Low                            | Moderate                   | Low                                      | Moderate                                  | Fair                      |
| Gillespie et al (2014)      | Low                        | Low                    | Low                            | Low                        | Low                                      | Low                                       | Good                      |
| Hawken et al (1993)         | Low                        | Moderate               | Low                            | High                       | High                                     | Moderate                                  | Poor                      |
| Huyen et al (2013)          | Low                        | Low                    | Low                            | Low                        | Low                                      | Low                                       | Good                      |
| Jasmer Lorna et al (2004)   | Low                        | Moderate               | Moderate                       | Low                        | High                                     | Low                                       | Poor                      |
| Jimenez Corona et al (2013) | Low                        | Low                    | Low                            | Moderate                   | High                                     | Low                                       | Poor                      |
| Jindani et al (2014)        | Low                        | Low                    | Low                            | Low                        | Low                                      | Low                                       | Good                      |
| Johnson et al (2009)        | Low                        | Low                    | Low                            | Low                        | Low                                      | Low                                       | Good                      |
| Lienhard et al (2011)       | Low                        | Low                    | Low                            | Low                        | Low                                      | Low                                       | Good                      |
| Luzze et al (2013)          | Low                        | Low                    | Low                            | Low                        | Low                                      | Low                                       | Good                      |
| Marx et al (2014)           | Low                        | Moderate               | Low                            | Low                        | High                                     | Low                                       | Poor                      |
| Merle et al (2014)          | Low                        | Low                    | Low                            | Low                        | Low                                      | Low                                       | Good                      |
| Pettit et al (2011)         | Low                        | Low                    | Low                            | Moderate                   | High                                     | Low                                       | Poor                      |
| Shen et al (2017)           | Low                        | Moderate               | Low                            | High                       | Low                                      | Low                                       | Poor                      |
| Sonnenberg et al (2001)     | Low                        | Low                    | Low                            | Moderate                   | Low                                      | Low                                       | Fair                      |

Table S5 Individual study risk factor estimates for undifferentiated recurrences

| Study                   | Effect measure | Number of observations | Number of missing data | Risk factor                                        | Risk factor as reported by study                   | Estimate         | p-value | Adjusted estimate | p-value |
|-------------------------|----------------|------------------------|------------------------|----------------------------------------------------|----------------------------------------------------|------------------|---------|-------------------|---------|
| Anaam et al (2019)      | OR             | 751                    |                        | Low TB treatment adherence (yes)                   | Non adherence                                      | 3.73 (2.21-6.31) | <0.001  | 3.22 (1.76-5.87)  | <0.001  |
| Picon et al (2007)      | RR             | 610                    |                        | Low TB treatment adherence (yes)                   | Non compliance                                     | 4.02 (1.79-9.01) | 0.001   | 6.43 (2.02-20.44) | 0.002   |
| Pulido et al (1997)*    | HR             | 187                    |                        | Low TB treatment adherence (yes)                   | Poor compliance with therapy                       | 3.3 (1.2-12.1)   |         |                   |         |
| Thomas et al (2005)     | OR             | 491                    | 12                     | Low TB treatment adherence (yes)                   | Drug regularity irregular                          | 2.6 (1.5-4.7)    | <0.001  | 2.5 (1.4-4.6)     |         |
| Picon et al (2007)      | RR             | 607                    | 3                      | Advanced radiographical extent of TB disease (yes) | Advanced tuberculosis                              | 2.06 (0.83-5.12) | 0.122   |                   |         |
| Hang et al (2015)       | HR             | 388                    |                        | Advanced radiographical extent of TB disease (yes) | Presence of infiltrate on cxr >3zones              | 0.79 (0.27-2.25) |         |                   |         |
| Jo et al (2014)         | OR             | 317                    |                        | Advanced radiographical extent of TB disease (yes) | moderately to far advanced disease                 | 2.5 (0.5-12.3)   | 0.268   | 3.08 (0.4-23.78)  | 0.282   |
| Luzze et al (2013)      | HR             | 1334                   | 367                    | Advanced radiographical extent of TB disease (yes) | Extent of disease (end of treatment): far advanced | 2 (1.3-3.1)      |         | 1.3 (0.8-2.1)     |         |
| Chang et al (2004)      | OR             | 339                    |                        | Alcohol consumption (yes)                          | History of habitual alcohol drinking               | 1.4 (0.7-2.8)    |         |                   |         |
| Picon et al (2007)      | RR             | 610                    |                        | Alcohol consumption (yes)                          | Alcohol                                            | 1.9 (0.85-4.25)  | 0.121   |                   |         |
| Franke et al (2012)     | HR             | 367                    |                        | Alcohol consumption (yes)                          | Alcohol or substance use                           | 0.58 (0.14-2.47) | 0.46    |                   |         |
| Lee et al (2014)        | OR             | 600                    |                        | Alcohol consumption (yes)                          | History of alcohol use                             | 2.39 (1.51-3.77) | <0.001  | 1.79 (1.79-3.33)  | 0.06    |
| Thomas et al (2005)     | OR             | 486                    | 17                     | Alcohol consumption (yes)                          | Drinking (alcoholism) no                           | 2.3 (1.3-4.1)    | <0.1    |                   |         |
| Tian et al (2014)       | HR             | 480                    |                        | Alcohol consumption (yes)                          | Alcohol                                            | 1.79 (1.04-3.09) | 0.036   |                   |         |
| Velayutham et al (2018) | Relative risk  | 1108                   |                        | Alcohol consumption (yes)                          | Taking alcohol during treatment and or follow-up   | 1.46 (1.07-2)    | 0.017   | 1.06 (0.66-1.71)  | 0.81    |
| Anaam et al (2019)      | OR             | 751                    |                        | Body mass index <18.5 (yes)                        | Bmi <=18.5                                         | 2.37 (1.43-3.93) | 0.001   | 1.66 (0.86-3.19)  | 0.129   |
| Chang et al (2004)      | OR             | 339                    |                        | Body mass index <18.5 (yes)                        | Initial body weight < 50 kg                        | 1.7 (1-2.8)      |         | 1.79 (0.9-3.59)   |         |
| Franke et al (2012)     | HR             | 348                    |                        | Body mass index <18.5 (yes)                        | Low bmi (<18.5 in women or <20 in                  | 0.68 (0.25-1.87) | 0.45    |                   |         |

|                            |               |       |      |                             |                                          |                   |        |                   |        |
|----------------------------|---------------|-------|------|-----------------------------|------------------------------------------|-------------------|--------|-------------------|--------|
| Jo et al (2014)            | OR            | 317   |      | Body mass index <18.5 (yes) | men) or malnutrition<br>Bmi < 18.5 kg/m2 | 1.15 (0.13-10.53) | 0.901  | 0.6 (0.19-18.4)   | 0.597  |
| Luzze et al (2013)         | HR            | 1701  |      | Body mass index <18.5 (yes) | Bmi <18.9                                | 1.3 (0.9-1.7)     |        |                   |        |
| Thomas et al (2005)        | OR            | 489   | 14   | Body mass index <18.5 (yes) | Initial weight <42 kg □                  | 1.3 (0.7-2.3)     | 0.4    |                   |        |
| Tian et al (2014)          | HR            | 480   |      | Body mass index <18.5 (yes) | Malnutrition                             | 2.33 (1.32-4.12)  | 0.003  | 1.91 (1.11-4.291) | 0.019  |
| Velayutham et al (2018)    | Relative risk | 1108  |      | Body mass index <18.5 (yes) | Bmi < 18.5                               | 0.99 (0.47-2.07)  | 0.97   | 0.77 (0.26-2.27)  | 0.64   |
| Anaam et al (2019)         | OR            | 751   |      | Cavitary disease (yes)      | Cavitation                               | 2.08 (1.27-3.42)  | 0.004  | 2.01 (1.16-3.46)  | 0.012  |
| Chang et al (2004)         | OR            | 339   |      | Cavitary disease (yes)      | cavitation on initial chest radiograph   | 1.8 (1.1-2.9)     |        | 2.39 (1.14-5.05)  |        |
| Charalambous et al (2008)  | HR            | 503   | 106  | Cavitary disease (yes)      | Cavitation                               | 1.1 (0.5-2.5)     | 0.85   |                   |        |
| Picon et al (2007)         | RR            | 595   | 15   | Cavitary disease (yes)      | Cavitation                               | 1.55 (0.37-6.56)  | 0.551  |                   |        |
| Franke et al (2012)        | HR            | 389   |      | Cavitary disease (yes)      | Bilateral chest cavitations              | 0.88 (0.41-1.9)   | 0.74   |                   |        |
| Hang et al (2015)          | HR            | 388   |      | Cavitary disease (yes)      | Cavitation                               | 0.75 (0.36-1.59)  |        |                   |        |
| Jo et al (2014)            | OR            | 317   |      | Cavitary disease (yes)      | Cavitary disease                         | 1.6 (0.29-8.92)   | 5.91   | 1.02 (0.16-6.47)  | 0.981  |
| Kim et al (2021)*          | RR            | 355   |      | Cavitary disease (yes)      | Cavitary disease                         | 6.75 (0.8-57.22)  |        |                   |        |
| Lee et al (2014)           | OR            | 575   | 25   | Cavitary disease (yes)      | Initial cavitation`                      | 1.4 (0.93-2.1)    | 0.1    | 1.02 (0.62-1.68)  | 0.94   |
| Liu et al (2022)           | OR            |       | 1897 | Cavitary disease (yes)      | Bilateral cavitation                     | 1.51 (1.02-2.22)  |        | 1.56 (1.05-2.32)  | 0.029  |
| Luzze et al (2013)         | HR            | 1432  | 269  | Cavitary disease (yes)      | Cavitation                               | 1.6 (1.2-2.3)     |        | 1.4 (1-1.9)       |        |
| Nettles et al (2004)*      | Relative risk | 393   |      | Cavitary disease (yes)      | Cavitation                               | 1.14 (0.36-3.55)  |        |                   |        |
| Qiao Lin Ruan et al (2021) | HR            | 479   |      | Cavitary disease (yes)      | Pulmonary cavity                         | 1.51 (1.24-1.84)  | <0.001 | 1.51 (1.25-1.82)  | <0.001 |
| Shen et al (2017)          | HR            | 13067 | 350  | Cavitary disease (yes)      | Cavitation                               | 1.43 (1.23-1.67)  | <0.001 | 1.27 (1.06-1.51)  | <0.01  |
| Charalambous et al (2008)  | HR            | 496   | 113  | Chronic lung disease (yes)  | Silicosis advanced                       | 0.6 (0.2-1.9)     |        | 0.6 (0.2-2)       | 0.31   |
| Luzze et al (2013)         | HR            | 1435  | 266  | Chronic lung disease (yes)  | Fibrosis                                 | 1.4 (1-2)         |        | 1.2 (0.8-1.7)     |        |
| Pettit et al (2011)        | OR            | 98    |      | Chronic lung disease (yes)  | Chronic lung disease                     | 4.01 (1.15-13.94) | 0.03   | 5.28 (1.16-24.04) | 0.03   |
| Tian et al (2014)          | HR            | 480   |      | Chronic lung disease        | Copd                                     | 1.49 (0.87-2.56)  | 0.144  |                   |        |

|                                           |               |        |     |                                      |                             |                   |        |                     |        |
|-------------------------------------------|---------------|--------|-----|--------------------------------------|-----------------------------|-------------------|--------|---------------------|--------|
| Anaam et al (2019)                        | OR            | 751    |     | Diabetes mellitus (yes)              | Diabetes                    | 4.04 (2.18-7.48)  | <0.001 | 3.78 (1.84-7.8)     | <0.001 |
| Picon et al (2007)                        | RR            | 610    |     | Diabetes mellitus (yes)              | Diabetes                    | 0.04 (0-16.68)    | 0.301  |                     |        |
| Eksombatchai et al (2022)*                | RR            | 199571 |     | Diabetes mellitus (yes)              | Diabetes                    | 1.33 (1.26, 1.41) | <0.001 |                     |        |
| Franke et al (2012)                       | HR            | 360    |     | Diabetes mellitus (yes)              | Diabetes                    | 5.96 (1.75-20.29) | 0.004  | 10.47 (2.17-50.6)   | 0.004  |
| Jo et al (2014)                           | OR            | 317    |     | Diabetes mellitus (yes)              | Diabetes mellitus           | 0.98 (0.97-1)     | 0.908  | 0.78 (0.62-1.23)    | 0.897  |
| Lee et al (2014)                          | OR            | 600    |     | Diabetes mellitus (yes)              | Dm                          | 1.67 (1.18-2.38)  | 0.004  | 1.96 (1.22-3.15)    | 0.005  |
| Mave et al (2021)                         | Rate Ratio    | 799    |     | Diabetes mellitus (yes)              | Diabetes                    | 0.62 (0.3-1.27)   | 0.19   | 0.73 (0.31-1.7)     | 0.46   |
| Patrick George Tobias Cudahy et al (2020) | HR            | 333    |     | Diabetes mellitus (yes)              | Diabetes                    | 2.34 (0.56-9.77)  | 0.24   |                     |        |
| Shen et al (2017)                         | HR            | 12896  | 521 | Diabetes mellitus (yes)              | Diabetes                    | 1.43 (1.17-1.75)  | 0.001  | 1.4 (1.13-1.76)     | <0.01  |
| Tian et al (2014)                         | HR            | 480    |     | Diabetes mellitus (yes)              | Diabetes                    | 3.56 (1.86-6.82)  | <0.001 | 3.288 (1.301-8.312) | 0.012  |
| Velayutham et al (2018)                   | Relative risk | 1108   |     | Diabetes mellitus (yes)              | Diabetes                    | 0.58 (0.37-0.9)   |        |                     |        |
| Wu et al (2016)*                          | RR            | 196    | 5   | Diabetes mellitus (yes)              | Diabetes                    | 5.87 (1.26-27.4)  | 0.024  |                     |        |
| Anaam et al (2019)                        | OR            | 751    |     | Illiteracy (yes)                     | Illiterate                  | 2.07 (1.26-3.38)  | 0.004  | 1.54 (0.87-2.73)    | 0.143  |
| Dangisso et al (2018)                     | HR            | 1711   | 78  | Illiteracy (yes)                     | No education                | 1.4 (0.9-2.1)     |        | 1 (0.6-1.5)         |        |
| Datiko et al (2009)                       | HR            | 355    |     | Illiteracy (yes)                     | Literate : no               | 1.42 (0.53-5.00)  | 0.5    |                     |        |
| Sun et al (2017)                          | HR            | 234    |     | Illiteracy (yes)                     | Education <= primary school | 1.95 (1.14-3.35)  | 0.01   | 1.72 (0.88-3.35)    | 0.11   |
| Thomas et al (2005)                       | OR            | 486    | 17  | Illiteracy (yes)                     | Literate; no                | 0.83 (0.48-1.66)  | 0.7    |                     |        |
| Bartacek et al 2009                       | RR            | 945    |     | Fixed-dose combination TB drug (yes) |                             | 1.15 (0.83-1.59)  |        |                     |        |
| Chaulet et al (1995)*                     | RR            | 209    |     | Fixed-dose combination TB drug (yes) |                             | 2.86 (0.12-69.42) |        |                     |        |
| Singapore BMRC (1991)*                    | RR            | 265    |     | Fixed-dose combination TB drug (yes) |                             | 3.74 (0.81-17.27) |        |                     |        |
| Su et al (2002)*                          | RR            | 51     |     | Fixed-dose combination TB drug (yes) |                             | 2.89 (0.12-67.64) |        |                     |        |
| Suryanto et al (2008)*                    | IRR           | 172    |     | Fixed-dose combination TB drug (yes) | -                           | 3.56 (0.78-16.24) | 0.08   |                     |        |

|                                           |               |      |     |                                      |      |                    |         |                   |         |
|-------------------------------------------|---------------|------|-----|--------------------------------------|------|--------------------|---------|-------------------|---------|
| Teo et al (1999)*                         | RR            | 271  |     | Fixed-dose combination TB drug (yes) |      | 4.21 (1.22-14.59)  |         |                   |         |
| Chaisson et al (1996)                     | Rate Ratio    | 427  |     | HIV (yes)                            | HIV  | 2.39 (0.78-7.59)   |         |                   |         |
| Charalambous et al (2008)                 | HR            | 508  | 101 | HIV (yes)                            | HIV  | 2.5 (1.2-5.3)      |         | 3 (1.3-7)         | 0.01    |
| Connolly et al (1999)*                    | Rate Ratio    | 403  |     | HIV (yes)                            | HIV  | 1.08 (0.42-2.87)   |         |                   |         |
| Crampin et al (2010)                      | Rate Ratio    | 584  |     | HIV (yes)                            | HIV  | 1.6 (0.9-2.7)      | 0.1     | 1.4 (0.8-2.4)     | 0.22    |
| Picon et al (2007)                        | RR            | 279  | 331 | HIV (yes)                            | HIV  | 11.25 (3.38-37.43) | <0.001  | 8.04 (2.35-27.5)  | 0.001   |
| Faustini et al (2008)                     | OR            | 360  | 10  | HIV (yes)                            | HIV  | 0.77 (0.04-13.57)  |         |                   |         |
| Fitzgerald et al (2000)                   | RR            | 233  |     | HIV (yes)                            | HIV  | 10.7 (1.4-81.6)    | 0.004   |                   |         |
| Fox et al (2018)                          | HR            | 9825 |     | HIV (yes)                            | HIV  | 1.3 (1.01-1.71)    | P<0.05. | 1.7 (1.1-2.4)     | P<0.05. |
| Hang et al (2015)                         | HR            | 401  |     | HIV (yes)                            | HIV  | 0.66 (0.09-4.85)   |         |                   |         |
| Jasmer Lorna et al (2004)*                | Rate Ratio    | 85   |     | HIV (yes)                            | HIV  | 1.11 (0.61-1.90)   |         |                   |         |
| Johnson et al (2000)                      | Rate Ratio    | 225  |     | HIV (yes)                            | HIV  | 2.47 (0.51-59.32)  |         |                   |         |
| Kassim et al (1995)*                      | Rate Ratio    | 835  |     | HIV (yes)                            | HIV  | 1.75 (0.67-5.49)   |         |                   |         |
| Kennedy et al (1996)*                     | Rate Ratio    | 168  |     | HIV (yes)                            | HIV  | 0.71 (0.15-3.86)   |         |                   |         |
| Luzze et al (2013)                        | HR            | 1700 | 1   | HIV (yes)                            | HIV  | 1.3 (0.9-1.8)      |         | 1.1 (0.7-1.6)     |         |
| Nahid et al (2007)                        | Rate Ratio    | 800  |     | HIV (yes)                            | HIV  | 9.23 (2.94-42.05)  |         |                   |         |
| Nettles et al (2004)*                     | Relative risk | 393  |     | HIV (yes)                            | HIV  | 4.98 (1.71-14.54)  |         |                   |         |
| Patrick George Tobias Cudahy et al (2020) | HR            | 333  |     | HIV (yes)                            | HIV  | 0.77 (0.39-1.53)   | 0.46    | 0.99 (0.48-2.05)  | 0.99    |
| Perriens et al (1991)*                    | Rate Ratio    | 385  |     | HIV (yes)                            | HIV  | 3.05 (1.18-7.44)   |         |                   |         |
| Perriens et al (1995)*                    | Rate Ratio    | 523  |     | HIV (yes)                            | HIV  | 0.91 (0.36-2.33)   |         |                   |         |
| Pettit et al (2011)                       | OR            | 98   |     | HIV (yes)                            | HIV  | 2.67 (0.77-9.18)   | 0.12    | 5.01 (1.07-23.39) | 0.04    |
| Sonnenberg et al (2001)                   | Rate Ratio    | 326  |     | HIV (yes)                            | HIV  | 2.49 (1.52-4.19)   |         |                   |         |
| Tian et al (2014)                         | HR            | 407  | 73  | HIV (yes)                            | HIV  | 1.5 (0.78-2.88)    | 0.222   |                   |         |
| Velayutham et al (2018)                   | Relative risk | 1108 |     | HIV (yes)                            | HIV  | 1.34 (0.55-3.29)   |         |                   |         |
| Anaam et al (2019)                        | OR            | 751  |     | Male sex (yes)                       | Male | 1.49 (0.89-2.48)   | 0.127   |                   |         |

|                                           |               |         |      |                        |                         |                   |         |                  |          |
|-------------------------------------------|---------------|---------|------|------------------------|-------------------------|-------------------|---------|------------------|----------|
| Crampin et al (2010)                      | Rate Ratio    | 584.00  |      | Male sex (yes)         | Male                    | 0.59 (0.34-1.01)  |         |                  |          |
| Datiko et al (2009)                       | HR            | 368.00  |      | Male sex (yes)         | Male                    | 1.8 (0.6-5.5)     | 0.3     |                  |          |
| Picon et al (2007)                        | RR            | 610     |      | Male sex (yes)         | Male                    | 2.1 (0.84-5.22)   | 0.111   |                  |          |
| Faustini et al (2008)                     | OR            | 352     | 8    | Male sex (yes)         | Male                    | 1.43 (0.53-3.81)  |         | 1.98 (0.3-12.83) |          |
| Fox et al (2018)                          | HR            | 9825.00 |      | Male sex (yes)         | Male                    | 1.3 (1.1-1.4)     | P<0.05. | 1.04 (0.7-1.5)   | P>=0.05. |
| Franke et al (2012)                       | HR            | 402.00  |      | Male sex (yes)         | Male                    | 1.64 (0.71-3.85)  | 0.24    |                  |          |
| Hang et al (2015)                         | HR            | 403.00  |      | Male sex (yes)         | Male                    | 0.4 (0.11-2)      |         |                  |          |
| Jiang et al (2022)                        | HR            |         | 7143 | Male sex (yes)         | Male                    | 1.42 (1.34-1.49)  | <0.001  | 1.29 (1.22-1.36) | <0.001   |
| Jo et al (2014)                           | OR            | 317     |      | Male sex (yes)         | Male gender             | 0.94 (0.15-5.68)  | 0.941   | 0.64 (0.12-3.44) | 0.602    |
| Lee et al (2014)                          | OR            | 600     |      | Male sex (yes)         | Male                    | 1.41 (0.99-2)     | 0.06    | 1.41 (1.41-2.31) | 0.17     |
| Liu et al (2022)                          | OR            |         | 1897 | Male sex (yes)         | Male                    | 1.79 (1.10-2.86)  |         | 1.33 (0.79-2.27) | 0.28     |
| Luzze et al (2013)                        | HR            | 1701    |      | Male sex (yes)         | Male                    | 1.1 (0.8-1.4)     |         |                  |          |
| Nettles et al (2004)*                     | Relative risk | 393     |      | Male sex (yes)         | Male                    | 2.03 (0.58-7.16)  |         |                  |          |
| Patrick George Tobias Cudahy et al (2020) | HR            | 333     |      | Male sex (yes)         | Male gender             | 1.13 (0.57-2.22)  | 0.71    |                  |          |
| Pettit et al (2011)                       | OR            | 98      |      | Male sex (yes)         | Male                    | 6.47 (1.39-30.26) | 0.02    |                  |          |
| Qiao Lin Ruan et al (2021)                | HR            | 479     |      | Male sex (yes)         | Male                    | 1.77 (1.46-2.13)  | <0.001  | 1.61 (1.3-2)     | <0.001   |
| Shen et al (2017)                         | HR            | 13147   |      | Male sex (yes)         | Male                    | 1.49 (1.22-1.81)  | <0.001  | 1.4 (1.1-1.75)   | <0.01    |
| Sun et al (2017)                          | HR            | 234.00  |      | Male sex (yes)         | Male                    | 1.04 (0.58-1.85)  | 0.89    | 0.99 (0.55-1.81) | 0.98     |
| Thomas et al (2005)                       | OR            | 503     |      | Male sex (yes)         | Male                    | 1.8 (0.8-3.9)     | 0.1     |                  |          |
| Tian et al (2014)                         | HR            | 480     |      | Male sex (yes)         | Male                    | 1 (0.58-1.72)     | 1       |                  |          |
| Velayutham et al (2018)                   | Relative risk | 1108    |      | Male sex (yes)         | Male                    | 2.23 (1.47-3.4)   | <0.001  | 2.43 (1.29-4.58) | 0.006    |
| Vree et al (2007)*                        | RR            | 304     |      | Male sex (yes)         | Male                    | 1.19 (0.5-2.84)   |         |                  |          |
| Fox et al (2018)                          | HR            | 9825    |      | MDR (vs no resistance) | Self reported MDR       | 9.9 (9-11)        | P<0.05. | 8.4 (7.4-9.6)    | P<0.05.  |
| Hang et al (2015)                         | HR            | 397     |      | MDR (vs no resistance) | Resistance to RIF       | 3.63 (0.86-15.26) |         | 3.1 (0.66-14.55) |          |
| Huyen et al (2013)                        | HR            | 35      |      | MDR (vs no resistance) | MDR                     | 4.23              | 0.029   | 1.58 (0.46-5.41) | 0.466    |
| Luzze et al (2013)                        | HR            | 932     | 769  | MDR (vs no resistance) | Resistant to H and/or R | 1.1 (0.6-2.2)     |         |                  |          |



|                            |               |      |     |                                                         |                                                           |                   |         |                   |         |
|----------------------------|---------------|------|-----|---------------------------------------------------------|-----------------------------------------------------------|-------------------|---------|-------------------|---------|
| Shen et al (2017)          | HR            | 7768 |     | MDR (vs no resistance)                                  | MDR                                                       | 3.12 (2.27-4.11)  | <0.001  | 2.9 (2.2-3.84)    | <0.001  |
| Sun et al (2017)           | HR            | 234  |     | MDR (vs no resistance)                                  | MDR                                                       | 3.37 (1.98-5.73)  | <0.001  | 2.75 (1.58-4.79)  | <0.001  |
| Thomas et al (2005)        | OR            | 487  | 16  | MDR (vs no resistance)                                  | Resistant to H and/or R                                   | 3.6 (1.5-8.5)     | <0.01   | 4.8 (2-11.6)      |         |
| Anaam et al (2019)         | OR            | 751  |     | Smear or culture positivity at 2 months treatment (yes) | Smear positivity at 2 months                              | 1.81 (0.73-4.48)  | 0.2     |                   |         |
| Chang et al (2004)         | OR            | 231  | 108 | Smear or culture positivity at 2 months treatment (yes) | Persistence of positive culture after 2-3 mo of treatment | 2.5 (0.8-7.2)     |         |                   |         |
| Picon et al (2007)         | RR            | 610  |     | Smear or culture positivity at 2 months treatment (yes) | Negative sputum conversion at month 4                     | 1.68 (0.55-5.61)  | 0.396   |                   |         |
| Hang et al (2015)          | HR            | 403  |     | Smear or culture positivity at 2 months treatment (yes) | Smear positivity at 2 months                              | 1.84 (0.75-4.5)   |         |                   |         |
| Jo et al (2014)            | OR            | 317  |     | Smear or culture positivity at 2 months treatment (yes) | Positive afb culture at 2 months of treatment             | 8.12 (1.4-47.44)  | 0.021   | 7.08 (1.25-42.23) | 0.068   |
| Nettles et al (2004)*      | Relative risk | 42   |     | Smear or culture positivity at 2 months treatment (yes) | Smear positivity at 2 months                              | 0.98 (0.06-16.65) |         |                   |         |
| Qiao Lin Ruan et al (2021) | HR            | 479  |     | Smear or culture positivity at 2 months treatment (yes) | Sputum positivity at 2 months                             | 1.56 (1.14-2.13)  | 0.001   | 1.39 (1.05-1.81)  | 0.02    |
| Thomas et al (2005)        | OR            | 503  |     | Smear or culture positivity at 2 months treatment (yes) | No smear conversion at 2 months                           | 1.1 (0.5-2.2)     | 0.9     |                   |         |
| Vree et al (2007)*         | RR            | 278  | 26  | Smear or culture positivity at 2 months treatment (yes) | Smear positivity at 2 months                              | 1.79 (0.29-11.25) |         |                   |         |
| Chang et al (2004)         | OR            | 339  |     | Previous TB episode (yes)                               | History of tuberculosis                                   | 1.1 (0.5-2.2)     |         |                   |         |
| Dangisso et al (2018)      | HR            | 1789 |     | Previous TB episode (yes)                               | Retreatment vs new patient                                | 3.1 (1.6-5.9)     |         | 2.7 (1.4-5.3)     |         |
| Fox et al (2018)           | HR            | 9825 |     | Previous TB episode (yes)                               | Prior TB                                                  | 3.3 (3-3.6)       | P<0.05. | 2.3 (2-2.7)       | P<0.05. |

|                                           |               |       |    |                                           |                                                    |                    |        |                  |        |
|-------------------------------------------|---------------|-------|----|-------------------------------------------|----------------------------------------------------|--------------------|--------|------------------|--------|
| Huyen et al (2013)                        | HR            | 35.00 |    | Previous TB episode (yes)                 | Previously treated                                 | 1.5                | 0.471  | 0.61 (0.19-1.9)  | 0.393  |
| Jo et al (2014)                           | OR            | 317   |    | Previous TB episode (yes)                 | Previous history of TB treatment                   | 0.97 (0.11-8.5)    | 0.981  | 0.56 (0.06-5.81) | 0.63   |
| Liu et al (2022)                          | OR            | 1897  |    | Previous TB episode (yes)                 | Previous TB treatment                              | 2.49 (1.71-3.61)   |        | 2.22 (1.52-3.26) | <0.001 |
| Patrick George Tobias Cudahy et al (2020) | HR            | 333   |    | Previous TB episode (yes)                 | Previous treatment for tuberculosis                | 0.59 (0.2-1.67)    | 0.32   |                  |        |
| Shen et al (2017)                         | HR            | 13147 |    | Previous TB episode (yes)                 | Retreated case                                     | 1.84 (1.55-2.19)   | <0.001 | 1.8 (1.45-2.2)   | <0.001 |
| Chang et al (2004)                        | OR            | 339   |    | Any drug resistance (yes)                 | Resistance in the initial drug sensitivity pattern | 1.8 (0.7-4.4)      |        |                  |        |
| Charalambous et al (2008)                 | HR            | 545   | 64 | Any drug resistance (yes)                 | Resistance                                         | 0.8 (0.2-1.9)      | 0.76   |                  |        |
| Crampin et al (2010)                      | Rate Ratio    | 584   |    | Any drug resistance (yes)                 | Resistance                                         | 4.2 (2-8.5)        |        |                  |        |
| Velayutham et al (2018)                   | Relative risk | 1108  |    | Any drug resistance (yes)                 | Baseline drug resistant                            | 0.92 (0.48-1.76)   | 0.81   |                  |        |
| East and Central Africa (1986)*           | RR            | 609   |    | Rifampicin less than 6 months vs 6 months | Regimen less than 6 months                         | 3 (1.08-8.35)      |        |                  |        |
| Jawahar et al (2013)*                     | HR            | 400   |    | Rifampicin less than 6 months vs 6 months | Moxifloxacin vs standard treatment                 | 1.41 (0.6-3.32)    | 0.432  |                  |        |
| Jawahar et al (2013)*                     | HR            | 400   |    | Rifampicin less than 6 months vs 6 months | Gatifloxacin vs standard regimen                   | 2.26 (1.05-4.87)   | 0.04   |                  |        |
| Luzze et al (2013)                        | HR            | 1701  |    | Rifampicin less than 6 months vs 6 months | 6H <sub>3</sub> E <sub>3</sub> vs standard regimen | 1.9 (1.2-2.9)      |        | 1.6 (0.9-2.7)    |        |
| Madras BMRC (1989)*                       | RR            | 459   |    | Rifampicin less than 6 months vs 6 months | Regimen less than 6 months                         | 0.5 (0.18-1.34)    |        |                  |        |
| Singapore BMRC (1981)*                    | RR            | 318   |    | Rifampicin less than 6 months vs 6 months | Regimen less than 6 months                         | 12.78 (1.68-97.12) |        |                  |        |
| Singapore BMRC (1981)*                    | RR            | 314   |    | Rifampicin less than 6 months vs 6 months | Regimen less than 6 months                         | 7.6 (1.77-32.67)   |        |                  |        |
| Tuberculosis Research Centre (1997)*      | RR            | 777   |    | Rifampicin less than 6 months vs 6 months | Regimen less than 6 months                         | 1.98 (1.14-3.47)   |        |                  |        |
| Velayutham 2020                           | RR            | 675   |    | Rifampicin less than 6 months vs 6 months | Regimen less than 6 months                         | 1.99 (0.96-4.09)   |        |                  |        |

|                                      |    |        |    |                                           |                                            |                     |         |                   |         |
|--------------------------------------|----|--------|----|-------------------------------------------|--------------------------------------------|---------------------|---------|-------------------|---------|
| Combs et al (1990)*                  | RR | 616    |    | Rifampicin more than 6 months vs 6 months | Regimen more than 6 months                 | 1 (0.37-2.72)       |         |                   |         |
| Hong Kong TBRC / Madras BMRC (1991)* | RR | 99     |    | Rifampicin more than 6 months vs 6 months | Regimen more than 6 months                 | 0.2 (0.05-0.85)     |         |                   |         |
| Luzze et al (2013)                   | HR | 1701   |    | Rifampicin more than 6 months vs 6 months | 6RH                                        | 0.7 (0.4-1.1)       |         | 0.8 (0.5-1.4)     |         |
| Somner et al (1990)                  | RR | 665    |    | Rifampicin more than 6 months vs 6 months | Regimen more than 6 months                 | 0.08 (0.02-0.38)    |         |                   |         |
| Dangisso et al (2018)                | HR | 1789   |    | Rural resident (vs urban)                 | Rural vs urban                             | 1.6 (0.9-2.6)       |         | 1.5 (0.9-2.8)     |         |
| Fox et al (2018)                     | HR | 9825   |    | Rural resident (vs urban)                 | Urban setting                              | 0.71 (0.62-0.77)    | P<0.05. | 0.71 (0.625-0.83) | P<0.05. |
| Jiang et al (2022)                   | HR | 7143   |    | Rural resident (vs urban)                 | Residence urban vs rural                   | 1.07 (1-1.14)       | 0.025   | 0.99 (0.92-1.07)  | 0.855   |
| Vree et al (2007)*                   | RR | 304    |    | Rural resident (vs urban)                 | Rural vs urban                             | 0.39 (0.1-1.48)     |         |                   |         |
| Anaam et al (2019)                   | OR | 751    |    | Smear positivity at diagnosis (yes)       | Smear positive                             | 0.77 (0.34-1.77)    | 0.546   |                   |         |
| Chang et al (2004)                   | OR | 339    |    | Smear positivity at diagnosis (yes)       | Initial sputum smear                       | 1.2 (0.8-2.1)       |         |                   |         |
| Faustini et al (2008)                | OR | 298    | 62 | Smear positivity at diagnosis (yes)       | Smear+                                     | 1.2 (0.38-3.81)     |         |                   |         |
| Jiang et al (2022)                   | HR | 7143   |    | Smear positivity at diagnosis (yes)       | Bacterial results positive vs negative     | 1.25 (1.19-1.31)    | <0.001  | 1.27 (1.21-1.33)  | <0.001  |
| Jo et al (2014)                      | OR | 317    |    | Smear positivity at diagnosis (yes)       | Positive afb smear at treatment initiation | 1.33 (0.24-7.35)    | 0.747   | 0.59 (0.1-3.61)   | 0.567   |
| Shen et al (2017)                    | HR | 13363  | 54 | Smear positivity at diagnosis (yes)       | Smear positive                             | 1.61 (1.26-2.07)    | <0.001  | 1.59 (1.19-2.14)  | <0.01   |
| Ahmad Khan et al (2016)              | OR | 332    |    | Smoking (yes)                             | Ever smoked                                | 2.05 (1.32-3.19)    |         | 1.86              |         |
| Anaam et al (2019)                   | OR | 751    |    | Smoking (yes)                             | Smoking                                    | 2.1 (1.18-3.75)     | 0.012   | 2.18 (1.07-4.47)  | 0.032   |
| Chang et al (2004)                   | OR | 339    |    | Smoking (yes)                             | Ever-smokers                               | 1.3 (0.7-2.3)       |         |                   |         |
| Franke et al (2012)                  | HR | 367.00 |    | Smoking (yes)                             | Ever smoked cigarettes                     | 1.02 (0.24-4.38)    | 0.98    |                   |         |
| Lee et al (2014)                     | OR | 600    |    | Smoking (yes)                             | History of smoking                         | 1.54 (1.1-2.15)     | 0.01    | 1.17 (0.71-1.93)  | 0.54    |
| Liu et al (2022)                     | OR | 1897   |    | Smoking (yes)                             | Smoking                                    | 1.37 (0.97-1.93)    |         | 1.32 (0.91-1.91)  | 0.146   |
| Pettit et al (2011)                  | OR | 98     |    | Smoking (yes)                             | Smoking                                    | 16.85 (2.06-137.76) | 0.008   |                   |         |
| Thomas et al (2005)                  | OR | 486    | 17 | Smoking (yes)                             | Smoking                                    | 2.8 (1.5-5.2)       | <0.001  | 3.1 (1.6-6)       |         |

|                         |               |      |               |                                           |                  |       |                     |       |
|-------------------------|---------------|------|---------------|-------------------------------------------|------------------|-------|---------------------|-------|
| Tian et al (2014)       | HR            | 480  | Smoking (yes) | Smoking                                   | 2.41 (1.29-4.49) | 0.005 | 2.387 (1.328-4.291) | 0.004 |
| Velayutham et al (2018) | Relative risk | 1108 | Smoking (yes) | Smoking during treatment and or follow-up | 1.53 (1.12-2.1)  | 0.007 | 1.13 (0.7-1.84)     | 0.61  |

\*Estimates were calculated based on data provided by the study

Table S6 Individual study risk factor estimates for relapses

| Study                     | Effect measure | Number of observations | Number of missing data | Risk factor                               | Estimate            | p-value | Adjusted estimate | p-value |
|---------------------------|----------------|------------------------|------------------------|-------------------------------------------|---------------------|---------|-------------------|---------|
| Romanowski et al (2017)   | OR             | 1187                   |                        | HIV infection (yes)                       | 2.2 (1.2-3.9)       |         | 2.6 (1.4-4.6)     |         |
| Sonnenberg et al (2001)   | HR             | 326                    |                        | HIV infection (yes)                       | 0.61 (0.26-1.4)     |         | 0.58 (0.24-1.4)   |         |
| Luzze et al (2013)        | HR             | 97                     | 1                      | HIV infection (yes)                       | 0.8 (0.5-1.2)       |         | 0.4 (0.2-0.8)     |         |
| Charalambous et al (2008) | Relative risk  | 503                    | 106                    | HIV infection (yes)                       | 2.53 (0.29-22.5)    |         |                   |         |
| Crampin et al (2010)      | Rate Ratio     | 584                    |                        | HIV infection (yes)                       | 0.8 (0.4-1.8)       |         |                   |         |
| Hawken et al (1993)*      | Relative risk  | 196                    |                        | HIV infection (yes)                       | 11.78 (0.57-241.63) |         |                   |         |
| Jasmer Lorna et al (2004) | Relative risk  | 75                     |                        | HIV infection (yes)                       | 1.01 (0.57-1.78)    |         |                   |         |
| Marx et al (2014)         | Relative risk  | 1624                   |                        | HIV infection (yes)                       | 0.37 (0.05-2.72)    |         |                   |         |
| Pettit et al (2011)       | Relative risk  | 1079                   |                        | HIV infection (yes)                       | 1.62 (0.36-7.3)     |         |                   |         |
| Shen et al (2017)         | HR             | 12848                  |                        | Male sex (yes)                            | 3.33 (1.54-7.23)    | <0.01   | 3.14 (1.44-6.85)  | 0.004   |
| Romanowski et al (2017)   | OR             | 1189                   |                        | Male sex (yes)                            | 1.9 (1-3.5)         |         | 2.1 (1.1-4)       |         |
| Crampin et al (2010)      | Rate Ratio     | 584                    |                        | Male sex (yes)                            | 0.59 (0.28-1.25)    |         |                   |         |
| Huyen et al (2013)        | HR             | 23                     |                        | Male sex (yes)                            | 1.495 (-)           | 0.446   |                   |         |
| Marx et al (2014)         | Relative risk  | 1624                   |                        | Male sex (yes)                            | 1.4 (0.84-2.32)     |         |                   |         |
| Johnson et al (2009)      | HR             | 386                    |                        | Male sex (yes)                            | 1.09 (0.4-3)        | 0.867   |                   |         |
| Johnson et al (2009)      | HR             | 386                    |                        | Rifampicin less than 6 months vs 6 months | 4.47 (1.27-15.68)   | 0.019   | 4.14 (1.17-14.63) | 0.0273  |
| Gillespie et al (2014)    | RR             |                        |                        | Rifampicin less than 6 months vs 6 months | 4.63 (2.64-8.14)    |         |                   |         |
| Jindani et al (2014)      | RR             |                        |                        | Rifampicin less than 6 months vs 6 months | 1.39 (0.93-2.08)    |         |                   |         |
| Merle et al (2014)        | RR             |                        |                        | Rifampicin less than 6 months vs 6 months | 0.3 (0.17-0.53)     |         |                   |         |

\*Estimates were calculated based on data provided by the stud

Table S7 Individual study risk factor estimates for reinfections

| Study                     | Effect measure | Number of observations | Number of missing data | Risk factor         | Estimate             | p-value | Adjusted estimate | p-value |
|---------------------------|----------------|------------------------|------------------------|---------------------|----------------------|---------|-------------------|---------|
| Luzze et al (2013)        | HR             | 97                     | 1                      | HIV infection (yes) | 0.8 (0.3-2.5)        |         | 0.6 (0.1-3.6)     |         |
| Sonnenberg et al (2001)   | HR             | 326                    |                        | HIV infection (yes) | 18.9 (2.5-145)       |         | 18.7 (2.4-143)    |         |
| Charalambous et al (2008) | Relative risk  | 508                    |                        | HIV infection (yes) | 6.33 (0.82-49.1)     |         |                   |         |
| Crampin et al (2010)      | Rate Ratio     | 584                    |                        | HIV infection (yes) | 13.5 (1.8-103.7)     |         |                   |         |
| Hawken et al (1993)*      | Relative risk  | 196                    |                        | HIV infection (yes) | 7.72 (0.32-186.65)   |         |                   |         |
| Jasmer Lorna et al (2004) | Relative risk  | 75                     |                        | HIV infection (yes) | 2.09 (0.19-22.97)    |         |                   |         |
| Marx et al (2014)         | Relative risk  | 1624                   |                        | HIV infection (yes) | 2.23 (0.95-5.26)     |         |                   |         |
| Pettit et al (2011)       | Relative risk  | 1078                   |                        | HIV infection (yes) | 56.23 (2.92-1082.09) |         |                   |         |

\*Estimates were calculated based on data provided by the study

Table S8 Summary table of adjusted estimates \*

| Risk factor                                             | Undifferentiated recurrence |        |       | N significant /<br>n total† |
|---------------------------------------------------------|-----------------------------|--------|-------|-----------------------------|
|                                                         | Min                         | Median | Max   |                             |
| <b>Socio demographic factors</b>                        |                             |        |       |                             |
| Male sex (yes)                                          | 0.64                        | 1.40   | 2.43  | 5/9                         |
| Low TB related knowledge (yes)                          | 2.28                        | 2.30   | 2.60  | 5/5                         |
| <b>Co-morbidities</b>                                   |                             |        |       |                             |
| HIV infection (yes)                                     | 0.99                        | 2.11   | 33.80 | 6/9                         |
| Diabetes mellitus (yes)                                 | 0.73                        | 1.90   | 10.47 | 6/8                         |
| Body mass index < 18.5 (yes)                            | 0.60                        | 1.66   | 1.91  | 1/5                         |
| <b>TB disease characteristics (first episode)</b>       |                             |        |       |                             |
| Cavitary disease (yes)                                  | 0.70                        | 1.34   | 2.39  | 4/8                         |
| MDR (vs no resistance)                                  | 1.58                        | 3.10   | 12.85 | 5/7                         |
| Previous TB episode (yes)                               | 0.56                        | 1.80   | 2.70  | 3/5                         |
| Smear or culture positivity at 2 months treatment (yes) | 1.39                        | 2.65   | 7.08  | 3/4                         |
| <b>TB treatment related factors (first episode)</b>     |                             |        |       |                             |
| Low TB treatment adherence (yes)                        | 2.50                        | 3.11   | 6.43  | 3/4                         |
| <b>Behavioural factors</b>                              |                             |        |       |                             |
| Smoking (yes)                                           | 1.02                        | 2.18   | 3.10  | 5/9                         |

\*We summary all adjusted estimates despite the factors consider for adjustment. Residual confounding is plausible.

†N significant: number of studies where the factor is significantly different from 1 over the total number of studies reporting the factor

Table S9: GRADE assessment of certainty of evidence

| No of studies                                               | Study design                              | Certainty assessment |                           |                           |             |                         | Certainty     | Importance |
|-------------------------------------------------------------|-------------------------------------------|----------------------|---------------------------|---------------------------|-------------|-------------------------|---------------|------------|
|                                                             |                                           | Risk of bias         | Inconsistency             | Indirectness              | Imprecision | Other considerations    |               |            |
| <b>UNDIFFERENTIATED RECURRENCES</b>                         |                                           |                      |                           |                           |             |                         |               |            |
| <i>Socio-demographic characteristics</i>                    |                                           |                      |                           |                           |             |                         |               |            |
| <b>Male sex</b>                                             |                                           |                      |                           |                           |             |                         |               |            |
| 23                                                          | Observational studies + randomised trials | serious <sup>a</sup> | serious <sup>b</sup>      | not serious               | not serious | none                    | Low ⊕⊕○○      |            |
| <b>Illiteracy (yes)</b>                                     |                                           |                      |                           |                           |             |                         |               |            |
| 5                                                           | Observational studies + randomised trials | serious <sup>a</sup> | serious <sup>b</sup>      | serious <sup>c</sup>      | not serious | none                    | Very low ⊕○○○ |            |
| <b>Rural resident (vs urban)</b>                            |                                           |                      |                           |                           |             |                         |               |            |
| 4                                                           | Observational studies + randomised trials | serious <sup>a</sup> | Very serious <sup>b</sup> | not serious               | not serious | non                     | Very low ⊕○○○ |            |
| <i>Behavioural characteristics of the patient</i>           |                                           |                      |                           |                           |             |                         |               |            |
| <b>Smoking (yes)</b>                                        |                                           |                      |                           |                           |             |                         |               |            |
| 9                                                           | Observational studies + randomised trials | serious <sup>a</sup> | not serious               | serious <sup>c</sup>      | not serious | none                    | Low ⊕⊕○○      |            |
| <b>Alcohol consumption (yes)</b>                            |                                           |                      |                           |                           |             |                         |               |            |
| 7                                                           | Observational studies + randomised trials | serious <sup>a</sup> | not serious               | serious <sup>c</sup>      | not serious | none                    | Low ⊕⊕○○      |            |
| <i>Clinical characteristics of the previous TB episode</i>  |                                           |                      |                           |                           |             |                         |               |            |
| <b>Cavitary disease (yes)</b>                               |                                           |                      |                           |                           |             |                         |               |            |
| 13                                                          | Observational studies + randomised trials | serious <sup>a</sup> | not serious               | not serious               | not serious | none                    | Moderate ⊕⊕⊕○ |            |
| <b>Positivity at 2 months (undifferentiated recurrence)</b> |                                           |                      |                           |                           |             |                         |               |            |
| 8                                                           | Observational studies + randomised trials | serious <sup>a</sup> | not serious               | serious <sup>c</sup>      | not serious | none                    | Low ⊕⊕○○      |            |
| <b>Previous TB episode (yes)</b>                            |                                           |                      |                           |                           |             |                         |               |            |
| 7                                                           | Observational studies + randomised trials | serious <sup>a</sup> | Very serious <sup>b</sup> | not serious               | not serious | none                    | Very low ⊕○○○ |            |
| <b>MDR (vs no resistance)</b>                               |                                           |                      |                           |                           |             |                         |               |            |
| 6                                                           | Observational studies + randomised trials | serious <sup>a</sup> | very serious <sup>b</sup> | not serious               | not serious | very strong association | Moderate ⊕⊕⊕○ |            |
| <b>Smear positivity at diagnosis (yes)</b>                  |                                           |                      |                           |                           |             |                         |               |            |
| 5                                                           | Observational studies + randomised trials | serious <sup>a</sup> | not serious               | not serious               | not serious | none                    | Moderate ⊕⊕⊕○ |            |
| <b>Any drug resistance (yes)</b>                            |                                           |                      |                           |                           |             |                         |               |            |
| 5                                                           | Observational studies + randomised trials | serious <sup>a</sup> | very serious <sup>b</sup> | very serious <sup>c</sup> | not serious | none                    | Very low ⊕○○○ |            |
| <b>Advanced radiographical extent of TB disease (yes)</b>   |                                           |                      |                           |                           |             |                         |               |            |
| 4                                                           | Observational studies + randomised trials | serious <sup>a</sup> | not serious               | serious <sup>c</sup>      | not serious | none                    | Low ⊕⊕○○      |            |
| <i>Treatment characteristics of the previous TB episode</i> |                                           |                      |                           |                           |             |                         |               |            |
| <b>Rifampicin less than 6 months vs 6 months</b>            |                                           |                      |                           |                           |             |                         |               |            |
| 9                                                           | randomised trials                         | not serious          | serious <sup>b</sup>      | serious <sup>a</sup>      | not serious | none                    | Low ⊕⊕○○      |            |
| <b>Rifampicin more than 6 months vs 6 months</b>            |                                           |                      |                           |                           |             |                         |               |            |



|                                                             |                                           |                        |                           |                           |             |                    |               |
|-------------------------------------------------------------|-------------------------------------------|------------------------|---------------------------|---------------------------|-------------|--------------------|---------------|
| 4                                                           | randomised trials                         | serious <sup>i</sup>   | very serious <sup>f</sup> | very serious <sup>g</sup> | not serious | none               | Very low ⊕○○○ |
| <b>Fixed dose combination TB drug (yes)</b>                 |                                           |                        |                           |                           |             |                    |               |
| 6                                                           | randomised trials                         | not serious            | not serious               | not serious               | not serious | none               | High ⊕⊕⊕⊕     |
| <b>Low TB treatment adherence (yes)</b>                     |                                           |                        |                           |                           |             |                    |               |
| 4                                                           | Observational studies + randomised trials | serious                | not serious               | serious <sup>e</sup>      | not serious | none               | Low ⊕⊕○○      |
| <b>Co-morbidities</b>                                       |                                           |                        |                           |                           |             |                    |               |
| <b>HIV infection (yes)</b>                                  |                                           |                        |                           |                           |             |                    |               |
| 23                                                          | Observational studies + randomised trials | serious <sup>a</sup>   | serious <sup>b</sup>      | not serious               | not serious | none               | Low ⊕⊕○○      |
| <b>Body mass index &lt;18.5 (yes)</b>                       |                                           |                        |                           |                           |             |                    |               |
|                                                             | Observational studies + randomised trials | serious <sup>a</sup>   | not serious               | very serious <sup>c</sup> | not serious | none               | Very low ⊕○○○ |
| <b>Chronic lung disease (yes)</b>                           |                                           |                        |                           |                           |             |                    |               |
| 4                                                           | Observational studies + randomised trials | not serious            | serious <sup>b</sup>      | serious <sup>e</sup>      | not serious | none               | Low ⊕⊕○○      |
| <b>Diabetes mellitus (yes)</b>                              |                                           |                        |                           |                           |             |                    |               |
| 12                                                          | Observational studies + randomised trials | serious <sup>a</sup>   | very serious <sup>f</sup> | not serious               | not serious | none               | Very low ⊕○○○ |
| <b>RELAPSES</b>                                             |                                           |                        |                           |                           |             |                    |               |
| <b>Socio-demographic characteristics</b>                    |                                           |                        |                           |                           |             |                    |               |
| <b>Male sex (yes)</b>                                       |                                           |                        |                           |                           |             |                    |               |
| 5                                                           | Observational studies + randomised trials | serious <sup>a,j</sup> | serious <sup>b</sup>      | not serious               | not serious | none               | Low ⊕⊕○○      |
| <b>Co-morbidities</b>                                       |                                           |                        |                           |                           |             |                    |               |
| <b>HIV infection (yes)</b>                                  |                                           |                        |                           |                           |             |                    |               |
| 9                                                           | Observational studies + randomised trials | serious <sup>a,j</sup> | serious <sup>b</sup>      | not serious               | not serious | none               | Low ⊕⊕○○      |
| <b>Treatment characteristics of the previous TB episode</b> |                                           |                        |                           |                           |             |                    |               |
| <b>Rifampicin less than 6 months vs 6 months</b>            |                                           |                        |                           |                           |             |                    |               |
| 4                                                           | randomised trials                         | serious <sup>i</sup>   | Very serious <sup>f</sup> | serious <sup>g</sup>      | not serious | none               | Very low ⊕○○○ |
| <b>REINFECTIONS</b>                                         |                                           |                        |                           |                           |             |                    |               |
| <b>Co-morbidities</b>                                       |                                           |                        |                           |                           |             |                    |               |
| <b>HIV infection (yes)</b>                                  |                                           |                        |                           |                           |             |                    |               |
| 8                                                           | Observational studies + randomised trials | serious <sup>a,j</sup> | not serious               | not serious               | not serious | Strong association | Moderate ⊕⊕⊕○ |

**Explanations**

- We downgraded quality in the risk of bias domain because unadjusted estimates were used.
- Moderate heterogeneity detected based on I2 and/or forest plot inspection.
- Definitions for risk factors vary between studies
- High heterogeneity detected based on I2 and/or forest plot inspection
- Different regimens (duration, frequency, or composition) lead to downgrade quality due to indirectness
- Lack of attrition and control for confounding lead to downgrade due to risk of bias.
- Methodological heterogeneity may arise from differences in genotyping methods and availability of sample

## Appendix 5 Supplementary figures

Figure S1 Forest plot Undifferentiated recurrence: Male sex (yes)

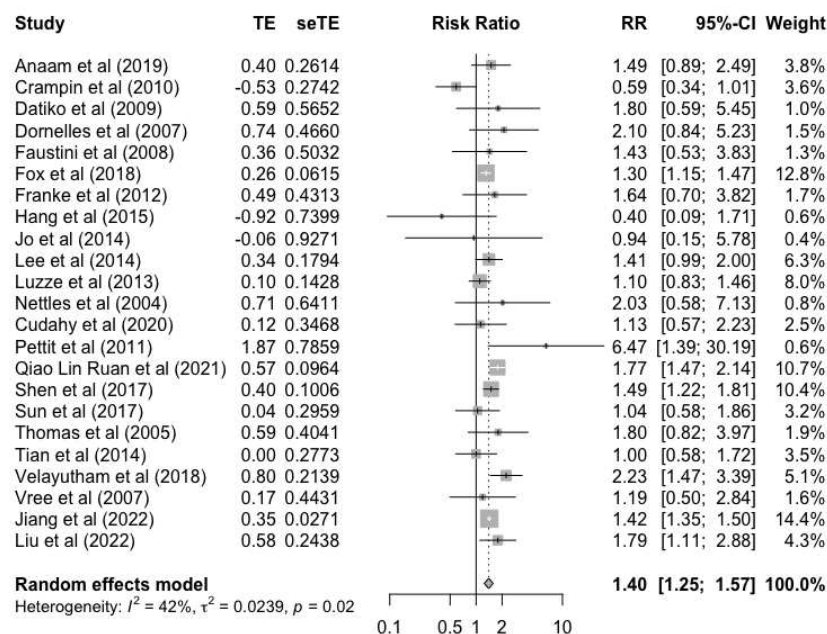

Figure S2 Forest plot Undifferentiated recurrence: Illiteracy (yes)

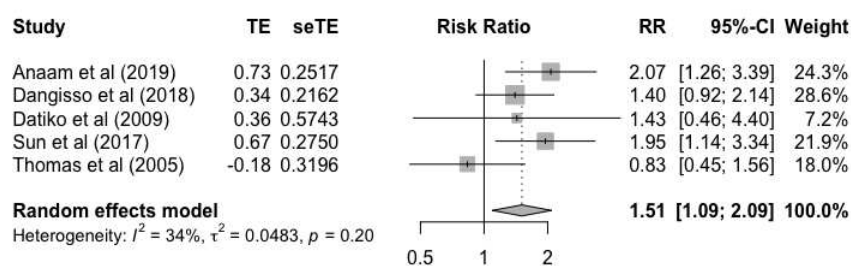

Figure S3 Forest plot Undifferentiated recurrence: Rural resident (vs urban)

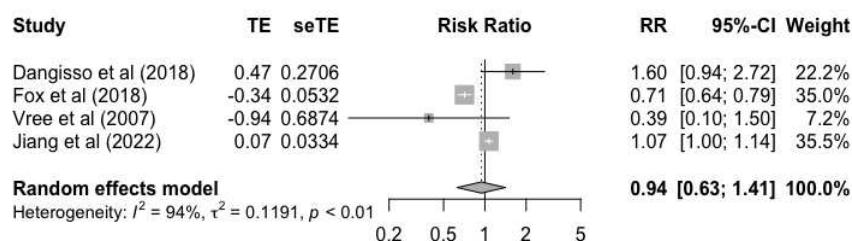

Figure S4 Forest plot Undifferentiated recurrence: Smoking (yes)

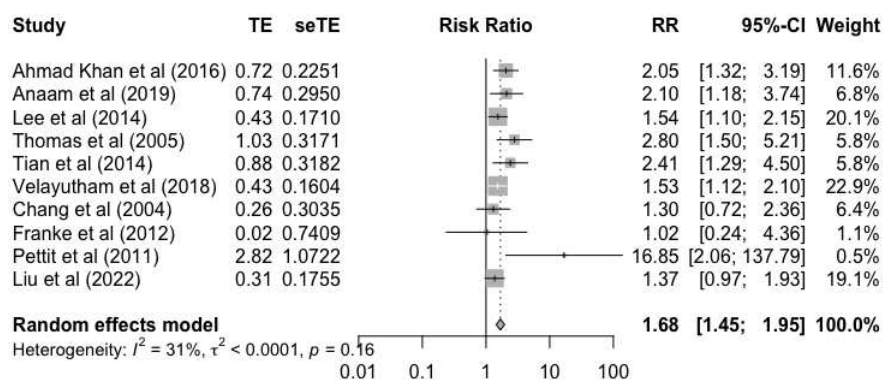

Figure S5 Forest plot Undifferentiated recurrence: Alcohol consumption (yes)

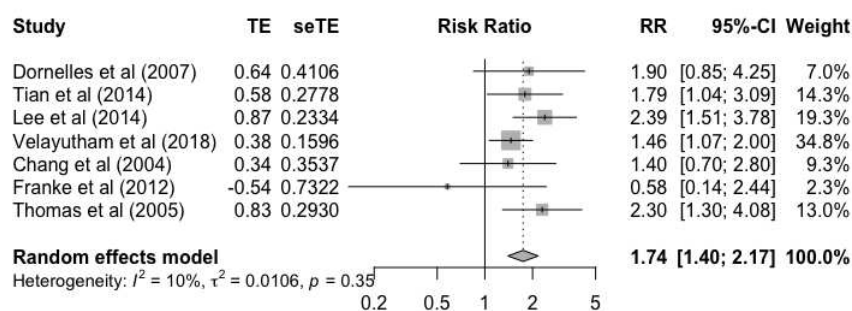

Figure S6 Forest plot Undifferentiated recurrence: Cavitory disease (yes)

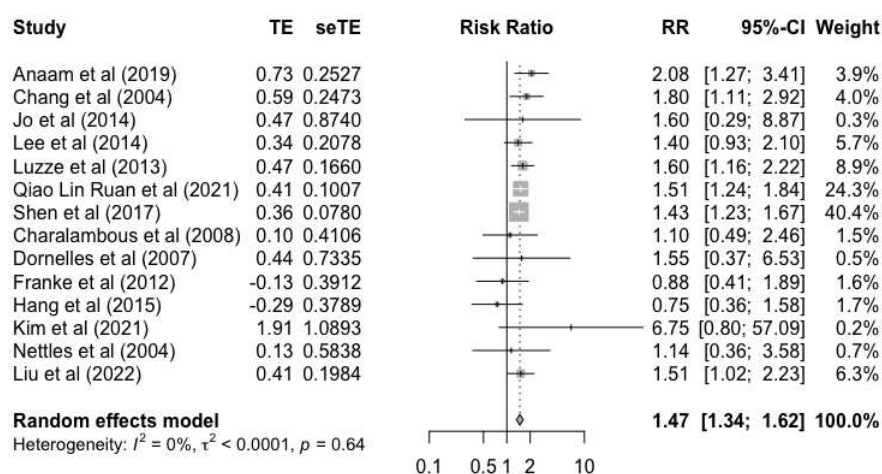

Figure S7 Forest plot Undifferentiated recurrence: Smear positivity at diagnosis (yes)

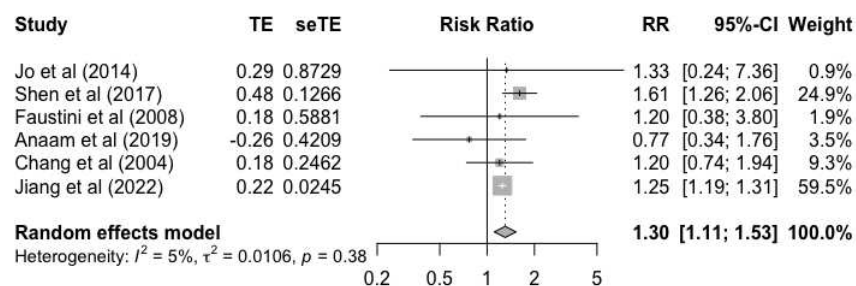

Figure S8 Forest plot Undifferentiated recurrence: Smear or culture positivity at 2 months treatment (yes)

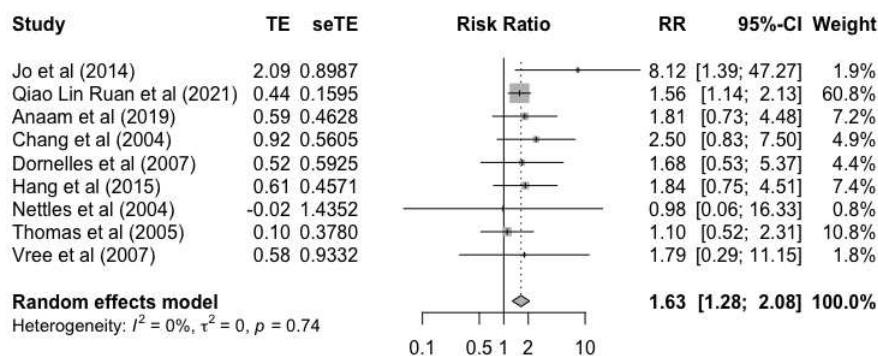

Figure S9 Forest plot Undifferentiated recurrence: Previous TB episode (yes)

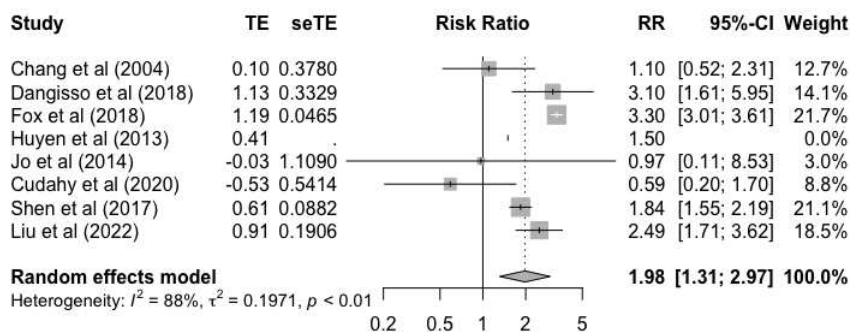

Figure S10 Forest plot Undifferentiated recurrence: Multidrug resistance (vs no resistance)

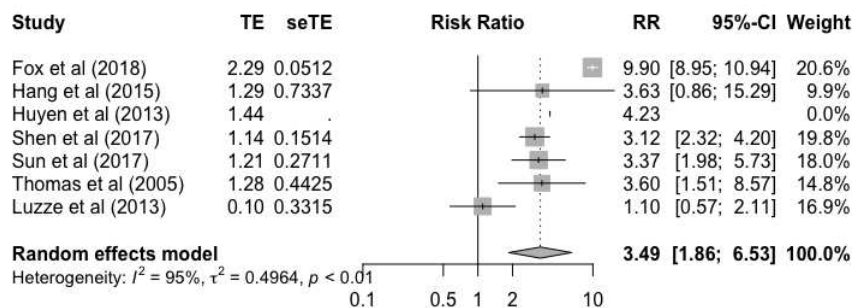

Figure S11 Forest plot Undifferentiated recurrence: Any drug resistance (yes)

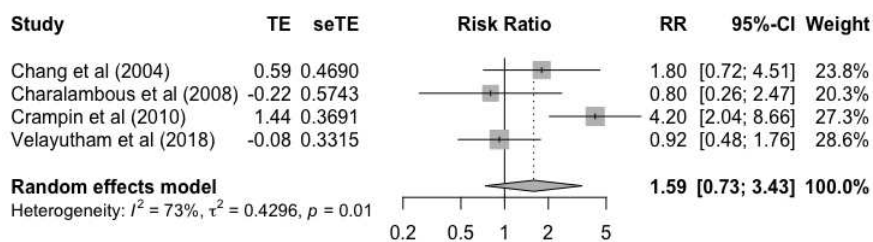

Figure S12 Forest plot Undifferentiated recurrence: Advanced radiographical extent of TB disease

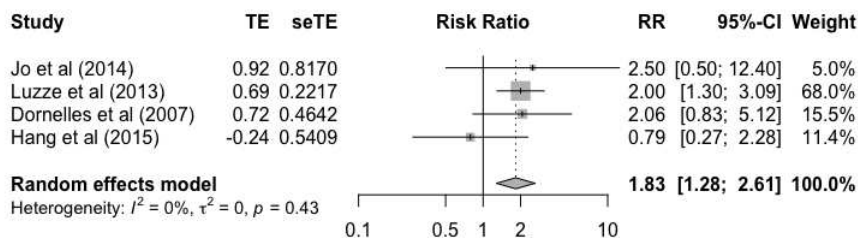

Figure S13 Forest plot Undifferentiated recurrence: Rifampicin less than 6 months vs 6 months

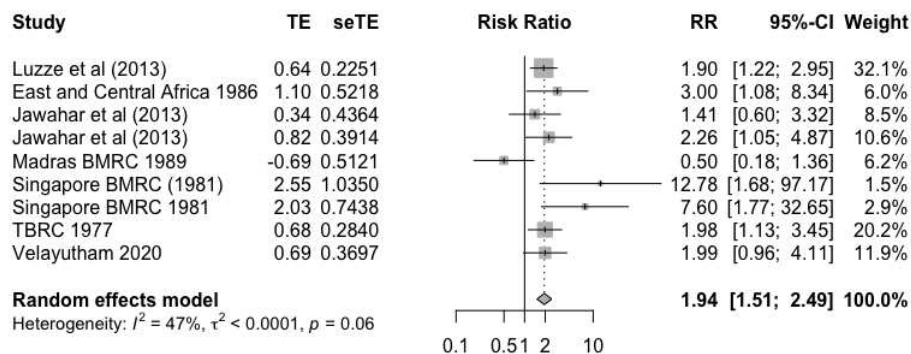

Figure S14 Forest plot Undifferentiated recurrence: Rifampicin more than 6 months vs 6 months

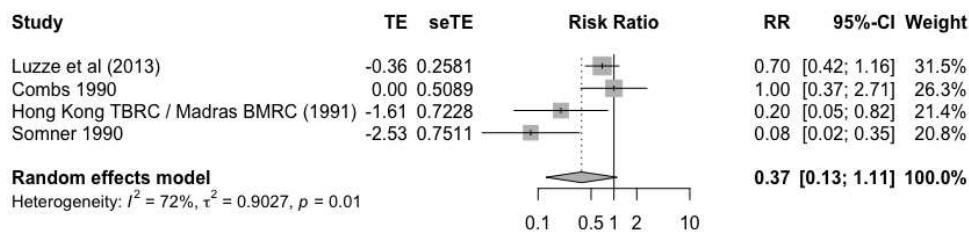

Figure S15 Forest plot Undifferentiated recurrence: Fixed-dose combination TB drug (yes)

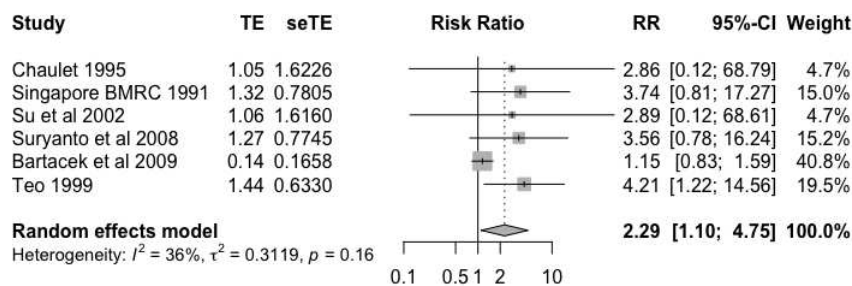

Figure S16 Forest plot Undifferentiated recurrence: Low TB treatment adherence (yes)

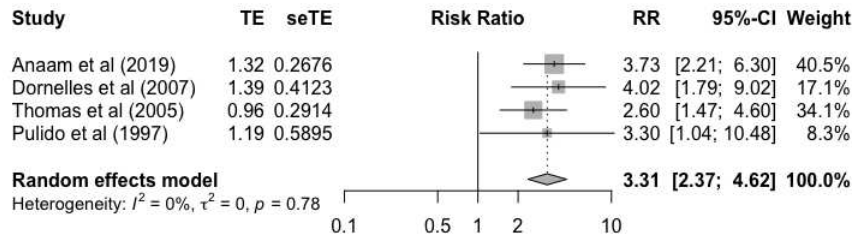

Figure S7 Forest plot Undifferentiated recurrence: HIV infection (yes)

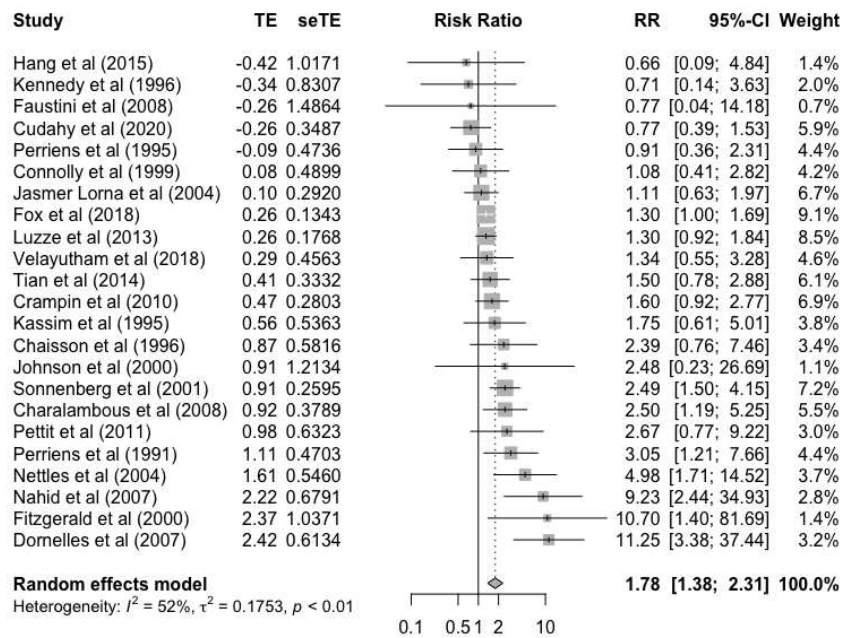

Figure S18 Forest plot Undifferentiated recurrence: Body mass index &lt;18.5 (yes)

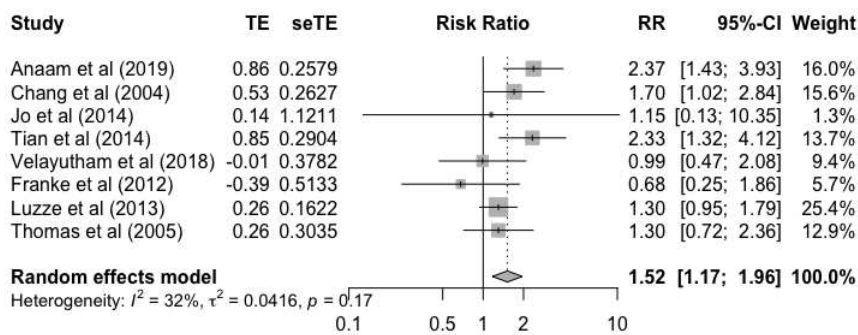

Figure S19 Forest plot Undifferentiated recurrence: Chronic lung disease (yes)

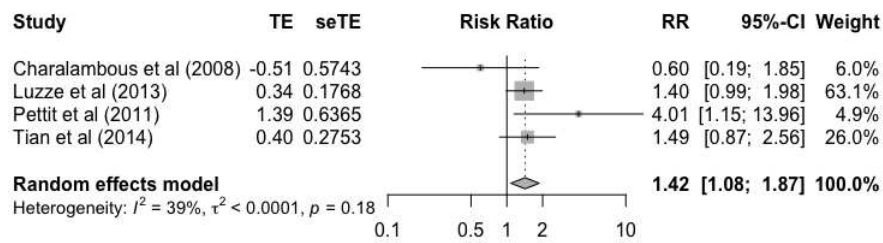

Figure S20 Forest plot Undifferentiated recurrence: Diabetes mellitus (yes)

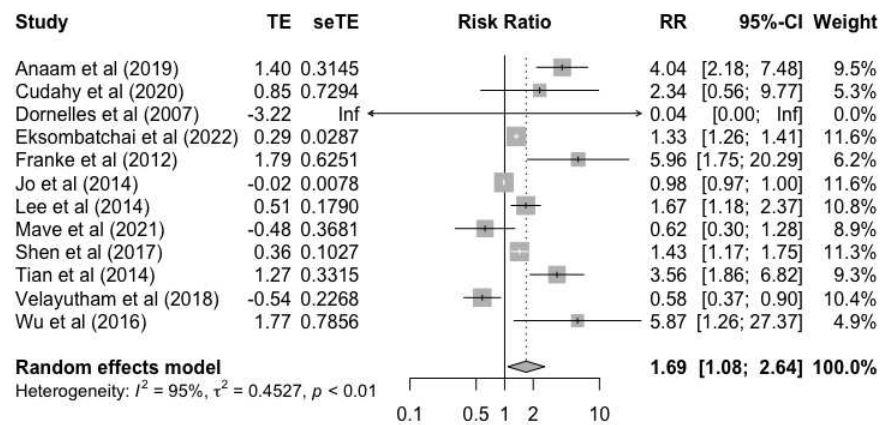



Figure S21 Forest plot Relapses Male sex (yes)

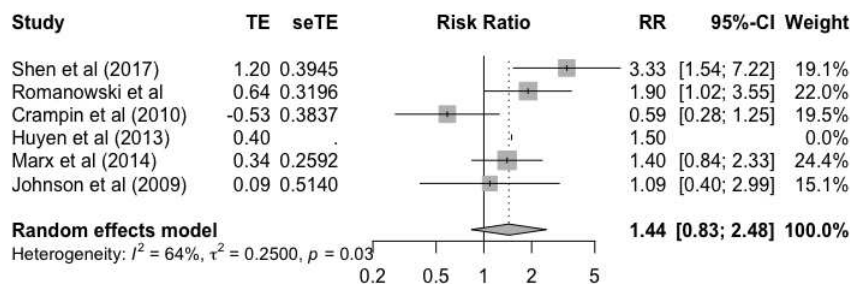

Figure S22 Forest plot Relapses HIV infection (yes)

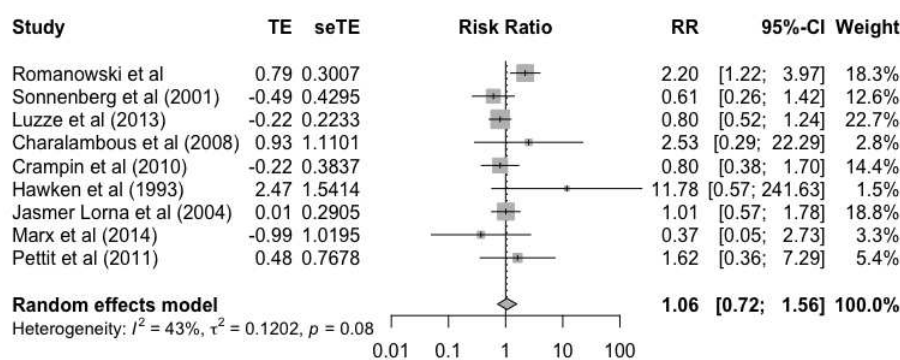

Figure S23 Forest plot Relapses Rifampicin less than six months

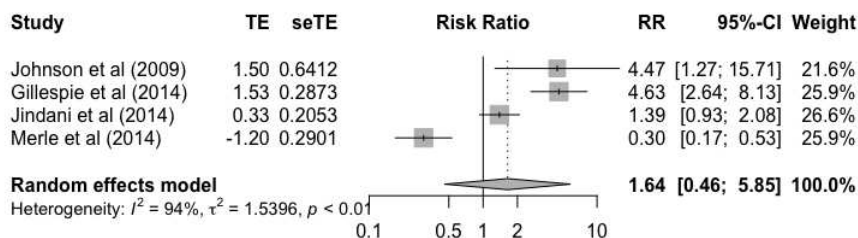

Figure S24 Forest plot Reinfections HIV infection (yes)

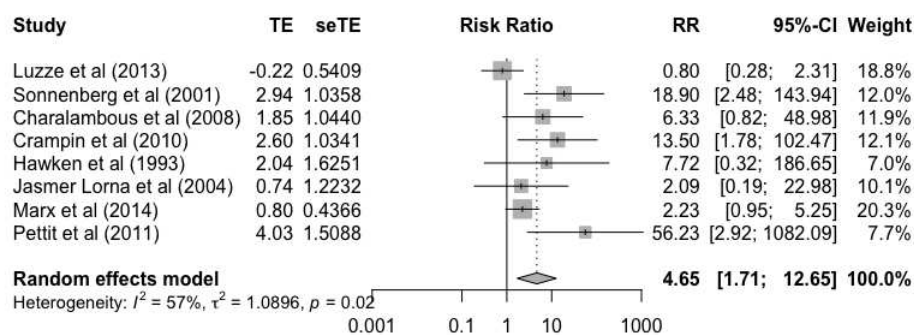

Figure S25 Funnel plot Undifferentiated recurrence: Male sex (yes)

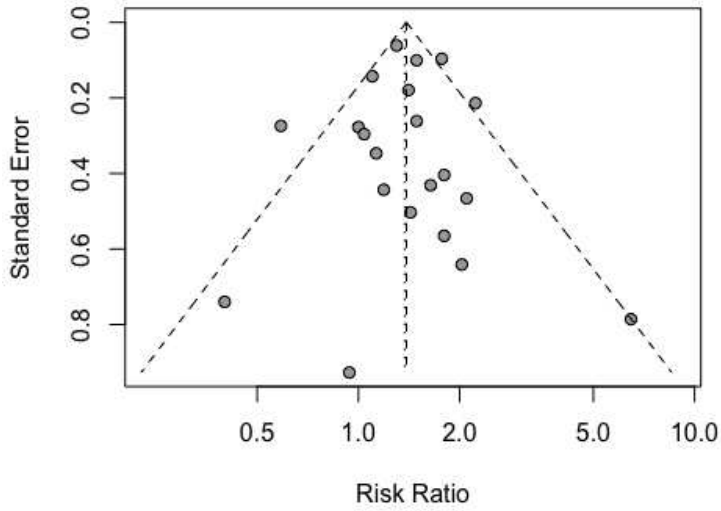

Egger's test:  $p=0.06830.8992$

Figure S26 Funnel plot Undifferentiated recurrence: HIV infection (yes)

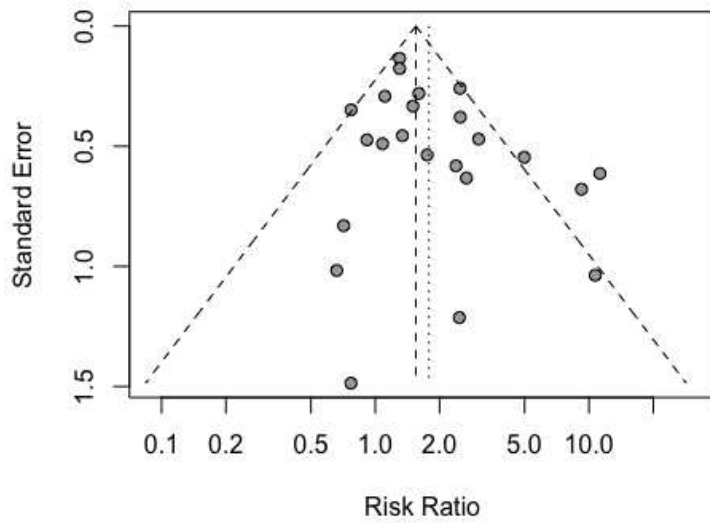

Egger's test:  $p=0.0683$

Figure S27 Funnel plot Undifferentiated recurrence: Diabetes mellitus (yes)

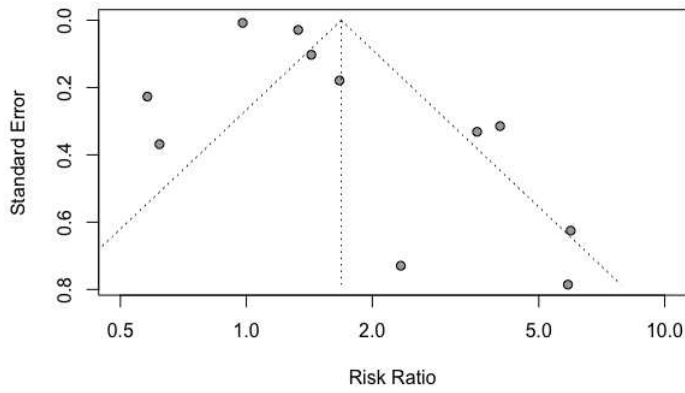

Figure S28 Funnel plot Undifferentiated recurrence: Cavitory disease (yes)

Egger's test:  $p= 0.9229$

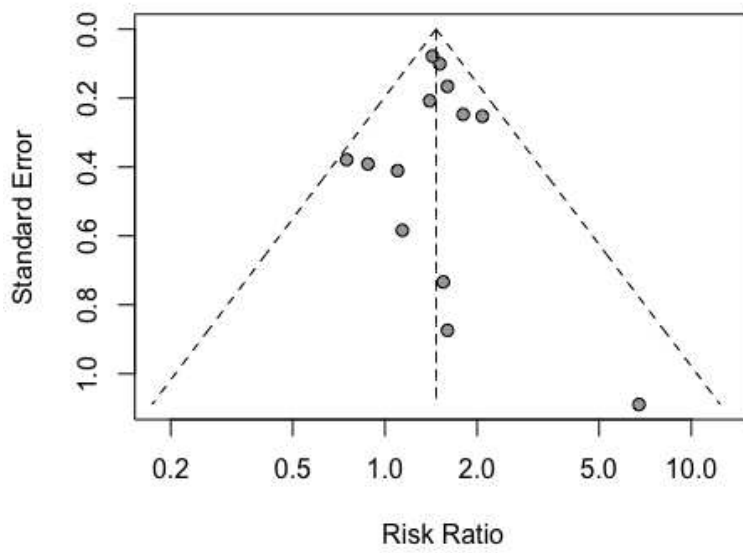

Figure S29 Funnel plot Undifferentiated recurrence: Smoking (yes)

Egger's test:  $p= 0.9229$

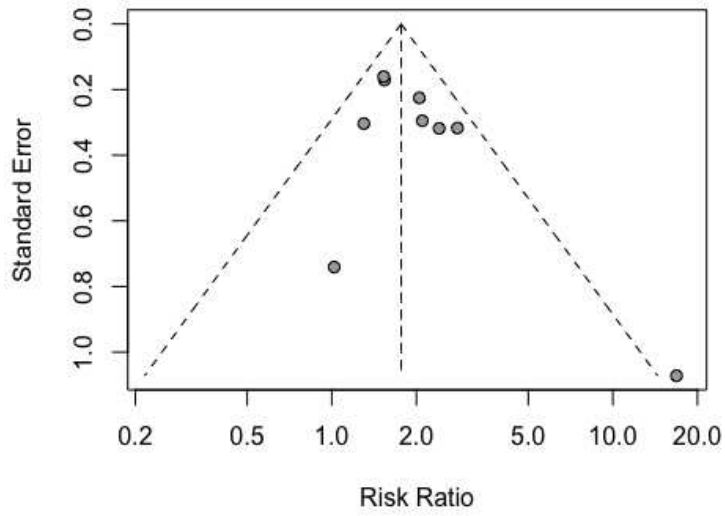

Egger's test: p= 0.0843

## Appendix 6 References of included articles

1. Ahmad Khan F, Gelmanova IY, Franke MF, Atwood S, Zemlyanaya NA, Unakova IA, et al. Aggressive Regimens Reduce Risk of Recurrence After Successful Treatment of MDR-TB. *Clin Infect Dis* [Internet]. 2016 Jul 15;63(2):214–20. Available from: <https://academic.oup.com/cid/article-lookup/doi/10.1093/cid/ciw276>
2. Anaam MS, Alrasheedy AA, Alshahli S, et al. Rate and risk factors of recurrent tuberculosis in Yemen: a 5-year prospective study. *Infect Dis (London, England)* 2020;52:161–9. doi:10.1080/23744235.2019.1690162
3. Balasubramanian R, Sivasubramanian S, Vijayan VK, et al. Five year results of a 3-month and two 5-month regimens for the treatment of sputum-positive pulmonary tuberculosis in South India. *Tubercle* 1990; 71: 253–8.
4. Castelo A, Jardim JR, Gohman S, et al. Comparison of daily and twice-weekly regimens to treat pulmonary tuberculosis. *Lancet* 1989; 2: 1173–6.
5. Chaisson RE, Clermont HC, Holt EA, et al. Six-Month Supervised Intermittent Tuberculosis Therapy in Haitian Patients With and Without HIV Infection. 1996; 154: 1034–8.
6. Chang KC, Leung CC, Yew WW, Ho SC, Tam CM. A nested case-control study on treatment-related risk factors for early relapse of tuberculosis. *Am J Respir Crit Care Med* 2004; 170: 1124–30.
7. Charalambous S, Grant AD, Moloi V, et al. Contribution of reinfection to recurrent tuberculosis in South African gold miners. *Int J Tuberc Lung Dis* 2008; 12: 942–8.
8. Chaulet P, Boulahbal F. Essai clinique d'une combinaison en proportions fixes de trois médicaments dans le traitement de la tuberculose. *Tuber Lung Dis* 1995;76:407–12. doi:10.1016/0962-8479(95)90006-3
9. Combs DL, O'Brien RJ, Geiter LJ. USPHS Tuberculosis Short-Course Chemotherapy Trial 21: effectiveness, toxicity, and acceptability. The report of final results. *Ann Intern Med* [Internet]. 1990 Mar 15;112(6):397–406. Available from: <http://www.ncbi.nlm.nih.gov/pubmed/2155569>
10. Connolly C, Reid A, Davies G, Sturm W, McAdam KP, Wilkinson D. Relapse and mortality among HIV-infected and uninfected patients with tuberculosis successfully treated with twice weekly directly observed therapy in rural South Africa. *AIDS* 1999; 13: 1543–7.
11. Crampin AC, Mwaungulu JN, Mwaungulu FD, et al. Recurrent TB: relapse or reinfection? The effect of HIV in a general population cohort in Malawi. *AIDS* 2010; 24: 417–26.
12. Cudahy PGT, Wilson D, Cohen T. Risk factors for recurrent tuberculosis after successful treatment in a high burden setting: a cohort study. *BMC Infect Dis* [Internet]. 2020 Dec 23;20(1):789. Available from: <https://pubmed.ncbi.nlm.nih.gov/33097000/>
13. Dangisso MH, Woldeamayrat EM, Datiko DG, Lindtjorn B. Long-term outcome of smear-positive tuberculosis patients after initiation and completion of treatment: A ten-year retrospective cohort study. *PLoS One* 2018; 13: e0193396.
14. Datiko DG, Lindtjorn B. Tuberculosis recurrence in smear-positive patients cured under DOTS in southern Ethiopia: retrospective cohort study. *BMC Public Health* 2009; 9: 348.
15. Eksombatchai D, Jeong D, Mok J, Jeon D, Kang H-Y, Kim HJ, et al. Sex differences in the impact of diabetes mellitus on tuberculosis recurrence: a retrospective national cohort study. *Int J Infect Dis* [Internet]. 2023 Feb;127:1–10. Available from: <http://www.ncbi.nlm.nih.gov/pubmed/36464121>
16. el Sahly HM El, Wright JA, Soini H, Bui TT, Escalante P. Recurrent tuberculosis in Houston, Texas: a population-based study. *Int J Tuberc Lung Dis* 2004; 8: 333–40.
17. Faustini A, Hall AJ, Mantovani J, Sangalli M, Perucci CA. Treatment outcomes and relapses of pulmonary tuberculosis in Lazio, Italy, 1999–2001: a six-year follow-up study. *Int J Infect Dis* [Internet]. 2008 Nov;12(6):611–21. Available from: <https://linkinghub.elsevier.com/retrieve/pii/S1201971208000349>
18. Fitzgerald DW, Desvarieux M, Severe P, Johnson WD Jr, Pape JW. Effect of post-treatment isoniazid on prevention of recurrent tuberculosis in HIV-1-infected individuals: a randomised trial. *Lancet* 2000; 356: 1470–4.
19. Fox GJ, Nguyen VN, Dinh NS, et al. Post-treatment Mortality Among Patients With Tuberculosis: A Prospective Cohort Study of 10 964 Patients in Vietnam. *Clin Infect Dis* 2018; 68: 1–8.
20. Franke MF, Appleton SC, Mitnick CD, Furin JJ, Bayona J, Chalco K, et al. Aggressive regimens for multidrug-resistant tuberculosis reduce recurrence. *Clin Infect Dis* [Internet]. 2013 Mar;56(6 PG-770–6):770–6. Available from: NS -
21. Gillespie SH, Crook AM, McHugh TD, Mendel CM, Meredith SK, Murray SR, et al. Four-Month Moxifloxacin-Based Regimens for Drug-Sensitive Tuberculosis. *N Engl J Med* [Internet]. 2014 Oct 23;371(17):1577–87. Available from: <http://www.nejm.org/doi/10.1056/NEJMoa1407426>
22. Gopalan N, Santhanakrishnan RK, Palaniappan AN, et al. Daily vs Intermittent Antituberculosis Therapy for Pulmonary Tuberculosis in Patients With HIV A Randomized Clinical Trial. *JAMA Intern Med* 2018; 178: 110029: 1–9.
23. Gupte AN, Kumar P, Araújo-Pereira M, Kulkarni V, Paradkar M, Pradhan N, et al. Baseline IL-6 is a biomarker for unfavorable tuberculosis treatment outcomes: a multi-site discovery and validation study. *Eur Respir J*. 2021 Oct;

24. Hang NTL, Maeda S, Keicho N, *et al.* Sublineages of Mycobacterium tuberculosis Beijing genotype strains and unfavorable outcomes of anti-tuberculosis treatment. *Tuberculosis* 2015; **95**: 336–42.
25. Hawken M, Nunn P, Gatua S, *et al.* Increased recurrence of tuberculosis in HIV-1-infected patients in Kenya. *Lancet* 1993; **342**: 332–7.
26. Huyen MNT, Buu TN, Tiemersma E, *et al.* Tuberculosis Relapse in Vietnam Is Significantly Associated With Mycobacterium tuberculosis Beijing Genotype Infections. *J Infect Dis* 2013; **207**. DOI:10.1093/infdis/jit048.
27. Jasmer RM, Boezeman L, Schwartzman K, *et al.* Recurrent tuberculosis in the United States and Canada: relapse or reinfection? *Am J Respir Crit Care Med* 2004; **170**: 1360–6.
28. Jawahar MS, Banurekha V V, Paramasivan CN, *et al.* Randomized clinical trial of thrice-weekly 4-month moxifloxacin or gatifloxacin containing regimens in the treatment of new sputum positive pulmonary tuberculosis patients. *PLoS One* 2013; **8**: e67030.
29. Jiang H, Yin J, Liu F, Yao Y, Cai C, Xu J, *et al.* Epidemiology of recurrent pulmonary tuberculosis by bacteriological features of 100 million residents in China. *BMC Infect Dis* [Internet]. 2022 Dec 22; **22**(1):638. Available from: <https://bmcinfectdis.biomedcentral.com/articles/10.1186/s12879-022-07622-w>
30. Jiménez-Corona ME, Cruz-hervert LP, García-garcía L, *et al.* Association of diabetes and tuberculosis: impact on treatment and post-treatment outcomes. *Thorax* 2013; **68**: 214–20.
31. Jindani A, Harrison TS, Nunn AJ, Phillips PPJ, Churchyard GJ, Charalambous S, *et al.* High-Dose Rifapentine with Moxifloxacin for Pulmonary Tuberculosis. *N Engl J Med* [Internet]. 2014 Oct 23; **371**(17):1599–608. Available from: <http://www.nejm.org/doi/10.1056/NEJMoal314210>
32. Jo K, Yoo J, Hong Y, *et al.* ScienceDirect Risk factors for 1-year relapse of pulmonary tuberculosis treated with a 6-month daily regimen. *Respir Med* 2014; **108**: 654–9.
33. Johnson JL, Hadad DJ, Dietze R, *et al.* Shortening treatment in adults with noncavitary tuberculosis and 2-month culture conversion. *Am J Respir Crit Care Med* 2009; **180**: 558–63.
34. Johnson JL, Okwera A, Nsubuga P, *et al.* Efficacy of an unsupervised 8-month rifampicin-containing regimen for the treatment of pulmonary tuberculosis in HIV-infected adults. 2000; **4**: 1032–40.
35. Kassim S, Sassen-Morokro M, Ackah A, *et al.* Two-year follow-up of persons with HIV-1- and HIV-2-associated pulmonary tuberculosis treated with short-course chemotherapy in West Africa. *AIDS* 1995; **9**: 1185–91.
36. Kennedy AN, Berger L, Curran J, *et al.* Randomized controlled trial of a drug regimen that includes ciprofloxacin for the treatment of pulmonary tuberculosis. *Clin Infect Dis* 1996; **22**: 827–33. NS -
37. Kim S-H, Shin YM, Yoo JY, Cho JY, Kang H, Lee H, *et al.* Clinical Factors Associated with Cavitory Tuberculosis and Its Treatment Outcomes. *J Pers Med*. 2021 Oct; **11**(11).
38. Lee P-H, Lin H-C, Huang AS-E, Wei S-H, Lai M-S, Lin H-H. Diabetes and risk of tuberculosis relapse: nationwide nested case-control study. *PLoS One* 2014; **9**: e92623.
39. Lienhardt C. Efficacy and Safety of a 4-Drug Fixed-Dose Combination Regimen Compared With Separate Drugs for Treatment of Pulmonary Tuberculosis. *JAMA* [Internet]. 2011 Apr 13; **305**(14):1415. Available from: <http://jama.jamanetwork.com/article.aspx?doi=10.1001/jama.2011.436>
40. Liu Q, Qiu B, Li G, Yang T, Tao B, Martinez L, *et al.* Tuberculosis reinfection and relapse in eastern China: a prospective study using whole-genome sequencing. *Clin Microbiol Infect* [Internet]. 2022 Jun; Available from: <https://linkinghub.elsevier.com/retrieve/pii/S1198743X22002786>
41. Luzze H, Johnson DF, Dickman K, *et al.* Relapse more common than reinfection in recurrent tuberculosis 1 – 2 years post treatment in urban Uganda. *Int J Tuberc Lung Dis* 2013; **17**: 361–7.
42. Ma Y, Pang Y, Shu W, *et al.* Metformin reduces the relapse rate of tuberculosis patients with diabetes mellitus: experiences from 3-year follow-up. *Eur J Clin Microbiol Infect Dis* 2018; **37**: 1259–63.
43. Marx FM, Dunbar R, Enarson DA, *et al.* The temporal dynamics of relapse and reinfection tuberculosis after successful treatment: a retrospective cohort study. *Clin Infect Dis* 2014; **58**: 1676–83.
44. Mave V, Gaikwad S, Barthwal M, Chandanwale A, Lokhande R, Kadam D, *et al.* Diabetes Mellitus and Tuberculosis Treatment Outcomes in Pune, India. *Open Forum Infect Dis* [Internet]. 2021 Apr 1; **8**(4):ofab097. Available from: <https://pubmed.ncbi.nlm.nih.gov/33884278/>
45. Merle CS, Fielding K, Bah Sow O, *et al.* A Four-Month Gatifloxacin-Containing Regimen for Treating Tuberculosis. *N Eng J Med* 2014; **371**: 1588-98
46. Moreno-Martinez R. Incidencia de recaída y factores de riesgo asociados en pacientes con tuberculosis pulmonar. *Rev Med Inst Mex Segur Soc* 2007; **45**: 335–42.
47. Nahid P, Gonzalez LC, Rudoy I, *et al.* Treatment outcomes of patients with HIV and tuberculosis. *Am J Respir Crit Care Med* 2007; **175**: 1199–206
48. Nettles RE, Mazo D, Alwood K, *et al.* Risk factors for relapse and acquired rifamycin resistance after directly observed tuberculosis treatment: a comparison by HIV serostatus and rifamycin use. *Clin Infect Dis* 2004; **38**: 731–6.
49. Nie W, Wang J, Zeng J, Wang Q, Du Y, Tan Q, *et al.* Adjunctive interleukin-2 for the treatment of drug-susceptible tuberculosis: a randomized control trial in China. *Infection* [Internet]. 2022 Apr 25; **50**(2):413–21. Available from: <https://pubmed.ncbi.nlm.nih.gov/34562262/>

50. No authors listed. A Controlled Clinical Comparison of 6 and 8 Months of Antituberculosis Chemotherapy in the Treatment of Patients with Silicotuberculosis in Hong Kong. *Am Rev Respir Dis* [Internet]. 1991 Feb;143(2):262–7. Available from: <http://www.ncbi.nlm.nih.gov/pubmed/1990938>
51. No authors listed. A Controlled Clinical Trial of 3- and 5-month regimens in the treatment of sputum-positive pulmonary tuberculosis in South India. Tuberculosis Research Centre, Madras, and National Tuberculosis Institute, Bangalore. *Am Rev Respir Dis* 1986; **134**: 27–33.
52. No authors listed. A controlled clinical trial of oral short-course regimens in the treatment of sputum-positive pulmonary tuberculosis. Tuberculosis Research Center. *Int J Tuberc Lung Dis* 1997; **1**: 509–17
53. No authors listed. A Controlled Trial of 3-Month, 4-Month, and 6-Month Regimens of Chemotherapy for Sputum-smear-negative Pulmonary Tuberculosis. Results at 5 years. Hong Kong Chest Service/Tuberculosis Research Centre, Madras/British Medical Research Council. *Am Rev Respir Dis* 1988; **139**: 871–6.
54. No authors listed. Assessment of a Daily Combined Preparation of Isoniazid , Rifampin , and Pyrazinamide in a Controlled Trial of Three 6-Month Regimens for Smear-positive Pulmonary Tuberculosis. *Am Rev Respir Dis* 1990; : 707–12.
55. No authors listed. Clinical trial of six-month and four-month regimens of chemotherapy in the treatment of pulmonary tuberculosis: the results up to 30 months. *Tubercle* 1981; **62**: 95–102.
56. No authors listed. Controlled clinical trial of 4 short-course regimens of chemotherapy (three 6-month and one 8-month) for pulmonary tuberculosis: Final report. *Tubercle* 1986; **67**: 5–15.
57. No authors listed. Controlled trial of 4 three-times-weekly regimens and a daily regimen all given for 6 months for pulmonary tuberculosis second report: the results up to 24 months. Hong Kong Chest Service/British Medical Research Council. *Tubercle* 1982; **63**: 89–98.
58. No authors listed. Five year Follow-Up of a Clinical Trial of Three 6-Month Regimens of Chemotherapy Given Intermittently in the Continuation Phase in the Treatment of Pulmonary Tuberculosis. *Am Rev Respir Dis* 1988; **137**: 1147–50.
59. Perriens JH, Colebunders RL, Karahunga C, *et al*. Increased Mortality and Tuberculosis Treatment Failure Rate among Human Immunodeficiency Virus (HIV) Seropositive Compared with HIV Seronegative Patients with Pulmonary Tuberculosis Treated with " Standard " Chemotherapy in Kinshasa, Zaire. *Am Rev Respir Dis* 1991; **144**: 750–5
60. Perriens JH, St Louis ME, Mukadi YB, *et al*. Pulmonary tuberculosis in HIV infected patients in Zaire, a Controlled Trial of Treatment for Either 6 or 12 Months. *N Eng J Med* 1995; **332**: 779–84.
61. Pettit AC, Kaltenbach LA, Maruri F, *et al*. Chronic lung disease and HIV infection are risk factors for recurrent tuberculosis in a low-incidence setting. *Int J Tuberc Lung Dis* 2011; **15**: 906–11.
62. Picon PD, Bassanesi SL, Caramori MLA, *et al*. Risk factors for recurrence of tuberculosis. *J Bras Pneumol* 2007; **33**: 572–8.
63. Pillay K, Lewis L, Rambaran S, Yende-Zuma N, Archary D, Gengiah S, *et al*. Plasma Biomarkers of Risk of Tuberculosis Recurrence in HIV Co-Infected Patients From South Africa. *Front Immunol* [Internet]. 2021 Mar 25;12:631094. Available from: <https://pubmed.ncbi.nlm.nih.gov/33841412/>
64. Pulido F, Pena J, Rubio R, *et al*. Relapse of Tuberculosis After Treatment in Human Immunodeficiency Virus Infected Patients. *Arch Intern Med* 1997. **157**: 227–3.
65. Racil H, Ben Amar J, Mami M, Chabbou A. Facteurs prédictifs des récidiées de tuberculose pulmonaire en Tunisie : une étude rétrospective. *Rev Mal Respir* [Internet]. 2012 Mar;29(3):412–8. Available from: <https://linkinghub.elsevier.com/retrieve/pii/S0761842512000046>
66. Romanowski K, Balshaw robert F, Benedetti A, Campbell JR, Menzies D, Ahmad Khan F, *et al*. Predicting tuberculosis relapse in patients treated with the standard 6-month regimen: an individual patient data meta-analysis. *Thorax* [Internet]. 2019 Mar [cited 2020 May 31];74(3):291–7. Available from: <https://thorax.bmj.com/lookup/doi/10.1136/thoraxjnl-2017-211120>
67. Ruan Q, Yang Q, Sun F, Liu W, Shen Y, Wu J, *et al*. Recurrent pulmonary tuberculosis after treatment success: a population-based retrospective study in China. *Clin Microbiol Infect* [Internet]. 2021 Sep; Available from: <https://pubmed.ncbi.nlm.nih.gov/34601149/>
68. Shen X, Yang C, Wu J, *et al*. Recurrent tuberculosis in an urban area in China: Relapse or exogenous reinfection? *Tuberculosis* 2017; **103**: 97–104.
69. Somner AR. Short-course chemotherapy in pulmonary tuberculosis. A controlled trial by the British Thoracic Association (third report). *Lancet* 1980; **1**: 1182–3.
70. Sonnenberg P, Murray J, Glynn JR, Shearer S, Kambashi B, Godfrey-Faussett P. HIV-1 and recurrence, relapse, and reinfection of tuberculosis after cure: a cohort study in South African mineworkers. *Lancet* 2001; **358**: 1687–93.
71. Su WJ, Perng RP. Fixed-dose combination chemotherapy (Rifater/Rifinah) for active pulmonary tuberculosis in Taiwan: a two-year follow-up. *Int J Tuberc Lung Dis* 2002; **6**: 1029–32.
72. Sun Y, Harley D, Vally H, Sleight A. Impact of Multidrug Resistance on Tuberculosis Recurrence and Long-Term Outcome in China. *PLoS One* 2017; **12**: e0168865.
73. Suryanto AA, van den Broek J, Hatta M, de Soldenhoff R, van der Werf MJ. Is there an increased risk of TB relapse in patients treated with fixed-dose combination drugs in Indonesia? *Int J Tuberc Lung Dis* 2008; **12**: 174–9.

74. Teo SK. Assessment of a combined preparation of isoniazid, rifampicin and pyrazinamide (Rifater) in the initial phase of chemotherapy in three 6-month regimens for smear-positive pulmonary tuberculosis: a five-year follow-up report. *Int J Tuberc Lung Dis* 1999; **3**:126–32.NS -
75. Thomas A, Gopi PG, Santha T, *et al.* Predictors of relapse among pulmonary tuberculosis patients treated in a DOTS programme in South India. *Int J Tuberc Lung Dis* 2005; **9**: 556–61.
76. Thomas BE, Thiruvengadam K, S R, *et al.* Smoking, alcohol use disorder and tuberculosis treatment outcomes: A dual co-morbidity burden that cannot be ignored. *PLoS One* 2019; **14**: e0220507.
77. Tian P-W, Wang Y, Shen Y-C, Chen L, Wan C, Liao Z-L, *et al.* Different risk factors of recurrent pulmonary tuberculosis between Tibetan and Han populations in Southwest China. *Eur Rev Med Pharmacol Sci* [Internet]. 2014; **18**(10):1482–6. Available from: NS -
78. Velayutham B, Chadha VK, Singla N, *et al.* Recurrence of tuberculosis among newly diagnosed sputum positive pulmonary tuberculosis patients treated under the Revised National Tuberculosis Control Programme, India: A multi-centric prospective study. *PLoS One* 2018; **13**: e0200150.
79. Vree M, Huong NT, Duong BD, *et al.* Survival and relapse rate of tuberculosis patients who successfully completed treatment in Vietnam. *Int J Tuberc Lung Dis* 2007; **11**: 392–7.
80. Wang J-Y, Sun H-Y, Wang J-T, *et al.* Nine- to Twelve-Month Anti-Tuberculosis Treatment Is Associated with a Lower Recurrence Rate than 6-9-Month Treatment in Human Immunodeficiency Virus-Infected Patients: A Retrospective Population-Based Cohort Study in Taiwan. *PLoS One* 2015; **10**: e0144136.
81. Westerlund EE, Tovar MA, Lonnermark E, Montoya R, Evans CA. Tuberculosis-related knowledge is associated with patient outcomes in shantytown residents; results from a cohort study, Peru. *J Infect* 2015; **71**: 347–57.
82. William W, Ascobat P, Instiaty I, Agustin H. Outcomes of Daily Dose versus Part-daily Dose Treatment for Lung Tuberculosis: A Real-World Database Study in an Indonesian Hospital. *Acta Med Indones* [Internet]. 2021 Jan; **53**(1):18–23. Available from: <https://pubmed.ncbi.nlm.nih.gov/33818403/>
83. Wu J-T, Chiu C-T, Wei Y-F, Lai Y-F. Comparison of the safety and efficacy of a fixed-dose combination regimen and separate formulations for pulmonary tuberculosis treatment. *Clinics (Sao Paulo)* 2015; **70**: 429–34.
84. Wu Z, Guo J, Huang Y, Cai E, Zhang X, Pan Q. Journal of Diabetes and Its Complications Diabetes mellitus in patients with pulmonary tuberculosis in an aging population in Shanghai , China : Prevalence , clinical characteristics and outcomes. *J Diabetes Complications* 2015; **30**: 237–41
85. Zierski M, Bek E, Long MW, Snider DEJ. Short-course (6-month) cooperative tuberculosis study in Poland: results 30 months after completion of treatment. *Am Rev Respir Dis* 1981; **124**: 249–51.



## Appendix 7 References of excluded articles by reasons

### Study design does not match our inclusion criteria

- Ahmad D, Khan MM, Aslam F, Abbas S, Elahi Q-U-A. Association Of Smoking With Recurrence Of Pulmonary Kochs; After Completion Of Antituberculous Treatment. *J Ayub Med Coll Abbottabad*. 2016;28(4):781–7.
- Anger HA, Dworkin F, Sharma S, Munsiff SS, Nilsen DM, Ahuja SD. Linezolid use for treatment of multidrug-resistant and extensively drug-resistant tuberculosis, New York City, 2000–06. *J Antimicrob Chemother*. 2010 Apr;65(4):775–83.
- Augusto CJ, Carvalho W da S, Goncalves AD, Ceccato M das GB, Miranda SS de. Characteristics of tuberculosis in the state of Minas Gerais, Brazil: 2002–2009. *J Bras Pneumol [Internet]*. 2013;39(3):357–64. Available from: NS -
- Chao W-C, Huang Y-W, Yu M-C, Yang W-T, Lin C-J, Lee J-J, et al. Outcome correlation of smear-positivity but culture-negativity during standard anti-tuberculosis treatment in Taiwan. *BMC Infect Dis [Internet]*. 2015 Feb;15(PG-67):67. Available from: NS -
- Chien J-Y, Chen Y-T, Shu C-C, Lee J-J, Wang J-Y, Yu C-J, et al. Outcome correlation of smear-positivity for acid-fast bacilli at the fifth month of treatment in non-multidrug-resistant TB. *Chest [Internet]*. 2013 Jun;143(6):1725–32. Available from: NS -
- Daley CL. Tuberculosis recurrence in Africa: true relapse or re-infection? *Lancet (London, England) [Internet]*. 1993 Sep;342(8874):756–7. Available from: NS -
- Dizaji MK, Kazemnejad A, Tabarsi P, Zayeri F. Using competing risks model and competing events in outcome of pulmonary tuberculosis patients. *Int J mycobacteriology [Internet]*. 2016 Dec;5 Suppl 1(PG-S237):S237. Available from: NS -
- Dutta NK, Karakousis PC, NK. D, PC. K, Dutta NK, Karakousis PC. Can the duration of tuberculosis treatment be shortened with higher dosages of rifampicin? *Front Microbiol [Internet]*. 2015;6(PG-1117):1117. Available from: NS -
- Harries AD, Hargreaves NJ, Kwanjana JH, Salaniponi FM. Relapse and recurrent tuberculosis in the context of a national tuberculosis control programme. *Trans R Soc Trop Med Hyg [Internet]*. 2000;94(3):247–9. Available from: <http://www.ncbi.nlm.nih.gov/pubmed/10974988>
- Khanna A, Lohya S, Sharath BN, Harries AD, A. K, S. L, et al. Characteristics and treatment response in patients with tuberculosis and diabetes mellitus in New Delhi, India. *Public Heal action [Internet]*. 2013 Nov;3(Suppl 1):S48–50. Available from: NS -
- Lancestre G. [Pulmonary tuberculosis relapses: report on 102 cases observed between 1977 and 1981 (author's trans)]. *Etude 102 rechutes Tuberc Pulm Obs 1977 a 1981 [Internet]*. 1981;37(6):335–43. Available from: <http://ovidsp.ovid.com/ovidweb.cgi?T=JS&PAGE=reference&D=med2&NEWS=N&AN=7335578>
- Lee H, Kim J. A study on the relapse rate of tuberculosis and related factors in Korea using nationwide tuberculosis notification data. *Osong public Heal Res Perspect*. 2014 Dec;5(Suppl):S8–17.
- Lewis JJ, Liu X, Zhang Z, Thomas B V, Vassall A, Sweeney S, et al. Evaluation of a medication monitor-based treatment strategy for drug-sensitive tuberculosis patients in China: study protocol for a cluster randomised controlled trial. *Trials*. 2018 Jul;19(1):398.
- Lin C-B, Tang M, Hsu A-H, Miu W-C, Lee Y-S, Lee J-J, et al. Pilot study of twice-weekly therapy for pulmonary tuberculosis in Taiwan. *J Formos Med Assoc [Internet]*. 2011 Jul;110(7 PG-438–45):438–45. Available from: NS -
- Liu Y, Zhao S, Li Y, Song W, Yu C, Gao L, et al. Effect of ambient air pollution on tuberculosis risks and mortality in Shandong, China: a multi-city modeling study of the short- and long-term effects of pollutants. *Environ Sci Pollut Res [Internet]*. 2021 Jun 30;28(22):27757–68. Available from: <https://pubmed.ncbi.nlm.nih.gov/33515408/>
- Martin A, Herranz M, Navarro Y, Lasarte S, Ruiz Serrano MJ, Bouza E, et al. Evaluation of the inaccurate assignment of mixed infections by Mycobacterium tuberculosis as exogenous reinfection and analysis of the potential role of bacterial factors in reinfection. *J Clin Microbiol [Internet]*. 2011 Apr;49(4):1331–8. Available from: NS -
- Naidoo K, Dookie N, Naidoo K, Yende-Zuma N, Chimukangara B, Bhushan A, et al. Recurrent tuberculosis among HIV-coinfected patients: a case series from KwaZulu-Natal. *Infect Drug Resist*. 2018;11:1413–21.
- Oyieng'o D, Park P, Gardner A, Kisang G, Diero L, Sitienei J, et al. Community-based treatment of multidrug-resistant tuberculosis: early experience and results from Western Kenya. *Public Heal action [Internet]*. 2012 Jun;2(2):38–42. Available from: NS -
- Park Y-S, Hong S-J, Boo Y-K, Hwang E-S, Kim HJ, Cho S-H, et al. The national status of tuberculosis using nationwide medical records survey of patients with tuberculosis in Korea. *Tuberc Respir Dis (Seoul) [Internet]*. 2012 Jul;73(1 PG-48–55):48–55. Available from: NS -
- Phillips PPJ, Van Deun A, Ahmed S, Goodall RL, Meredith SK, Conradie F, et al. Investigation of the efficacy of the short regimen for rifampicin-resistant TB from the STREAM trial. *BMC Med [Internet]*. 2020 Dec 4;18(1):314. Available from: <https://pubmed.ncbi.nlm.nih.gov/33143704/>
- Pillay M, Onyebujoh P, Sturm AW, M. P. P. O, AW. S. Reinfection with Mycobacterium tuberculosis in an urban tuberculosis hospital. *Clin Microbiol Infect [Internet]*. 1998 Jan;4(1 PG-49–51):49–51. Available from: NS -
- Reechaipichitkul W, So-Ngern A, Chaimanee P, W. R, A. S-N, P. C. Treatment outcomes of new and previously-treated smear positive pulmonary tuberculosis at Srinagarind Hospital, a tertiary care center in northeast Thailand. *J Med Assoc Thai [Internet]*. 2014 May;97(5 PG-490–9):490–9. Available from: NS -
- Sadikot RT. Identifying patients at high risk of tuberculosis recurrence. *Int J mycobacteriology [Internet]*. 2016 Dec;5 Suppl 1(PG-S66):S66. Available from: NS -
- Sahebi L, Ansarin K, Maryam S, Monfaredan A, Sabbgh Jadid H, L. S, et al. The factors associated with tuberculosis recurrence in the northwest and west of iran. *Malays J Med Sci [Internet]*. 2014;21(6):27–35. Available from: NS -
- Salaniponi FM, Nyirenda TE, Kemp JR, Squire SB, Godfrey-Faussett P, Harries AD. Characteristics, management and outcome of patients with recurrent tuberculosis under routine programme conditions in Malawi. *Int J Tuberc Lung Dis [Internet]*. 2003 Oct;7(10):948–52. Available from: NS -
- Sarpal SS, Goel NK, Kumar D, Janmeja AK, SS. S, NK. G, et al. Treatment Outcome Among the Retreatment Tuberculosis (TB) Patients under RNTCP in Chandigarh, India. *J Clin Diagn Res [Internet]*. 2014 Feb;8(2):53–6. Available from: NS -
- Selassie AW, Pozsik C, Wilson D, Ferguson PL. Why pulmonary tuberculosis recurs: a population-based epidemiological study. *Ann Epidemiol [Internet]*. 2005 Aug;15(7 PG-519–25):519–25. Available from: NS -
- van Rie A, Victor TC, Richardson M, Johnson R, van der Spuy GD, Murray EJ, et al. Reinfection and mixed infection cause changing Mycobacterium tuberculosis drug-resistance patterns. *Am J Respir Crit Care Med [Internet]*. 2005 Sep;172(5 PG-636–42):636–42. Available from: NS -
- Vashakidze SA, Kempker JA, Jakobia NA, Gogishvili SG, Nikolaishvili KA, Goginashvili LM, et al. Pulmonary function and respiratory health after successful treatment of drug-resistant tuberculosis. *Int J Infect Dis*. 2019 May;82:66–72.

30. Velayati AA, Farnia P, Masjedi MR, AA. V, P. F, MR. M, et al. Recurrence after treatment success in pulmonary multidrug-resistant tuberculosis: predication by continual PCR positivity. *Int J Clin Exp Med* [Internet]. 2012;5(3):271–2. Available from: NS -
31. Yoshiyama T. Low risk of hospital-acquired infection and reinfection of multidrug-resistant tuberculosis. *Infect Dis (London, England)* [Internet]. 2017 Feb;49(2):158–60. Available from: NS -
32. Zhang Q, Xiao H, Sugawara I. Tuberculosis complicated by diabetes mellitus at shanghai pulmonary hospital, china. *Jpn J Infect Dis* [Internet]. 2009 Sep;62(5):390–1. Available from: NS -

Do not assess recurrences among successfully treated

1. Acuna-Villaorduna C, Ayakaka I, Dryden-Peterson S, Nakubulwa S, Worodria W, Reilly N, et al. High mortality associated with retreatment of tuberculosis in a clinic in Kampala, Uganda: a retrospective study. *Am J Trop Med Hyg*. 2015 Jul;93(1):73–5.
2. Ade S, Adjibode O, Wachinou P, Toundoh N, Awanou B, Agodokpessi G, et al. Characteristics and Treatment Outcomes of Retreatment Tuberculosis Patients in Benin. *Tuberc Res Treat* [Internet]. 2016;2016(PG-1468631):1468631. Available from: NS -
3. Ade S, Trebuq A, Harries AD, Affolabi D, Ade G, Agodokpessi G, et al. MDR-TB treatment needs in patients previously treated for TB in Cotonou, Benin. *Public Heal action* [Internet]. 2013 Jun;3(2):160–5. Available from: NS -
4. Al-Sahafi A, Al-Sayali MM, Mandoura N, Shah HBU, Al Sharif K, Almohammadi EL, et al. Treatment outcomes among tuberculosis patients in Jeddah, Saudi Arabia: Results of a community mobile outreach directly observed Treatment, Short-course (DOTS) project, compared to a standard facility-based DOTS: A randomized controlled trial. *J Clin Tuberc Other Mycobact Dis* [Internet]. 2021 Feb;22:100210. Available from: <https://pubmed.ncbi.nlm.nih.gov/33490640/>
5. Alvarez Alvarez C, Cabero Perez MJ, Guerra Diez L, San Segundo Arribas D. [Results of the implementation of a protocol for outpatient management of the paediatric patient with tuberculosis]. *J Healthc Qual Res*. 2018 Jul;33(4):206–12.
6. Alvaro-Meca A, Rodríguez-Gijón L, Díaz A, Gil A, Resino S. Incidence and mortality of tuberculosis disease in Spain between 1997 and 2010: impact of human immunodeficiency virus (HIV) status. *J Infect* [Internet]. 2014 Apr;68(4):355–62. Available from: <http://www.ncbi.nlm.nih.gov/pubmed/24365787>
7. Andrews JR, Gandhi NR, Moodley P, Shah NS, Bohlken L, Moll AP, et al. Exogenous reinfection as a cause of multidrug-resistant and extensively drug-resistant tuberculosis in rural South Africa. *J Infect Dis* [Internet]. 2008 Dec;198(11):1582–9. Available from: NS -
8. Balabanova Y, Drobniowski F, Fedorin I, Zakharova S, Nikolayevskyy V, Atun R, et al. The Directly Observed Therapy Short-Course (DOTS) strategy in Samara Oblast, Russian Federation. *Respir Res*. 2006 Mar;7:44.
9. Bastos ML, Cosme LB, Fregona G, do Prado TN, Bertolde AI, Zandonade E, et al. Treatment outcomes of MDR-tuberculosis patients in Brazil: a retrospective cohort analysis. *BMC Infect Dis* [Internet]. 2017 Nov;17(1):718. Available from: NS -
10. Boeree MJ, Heinrich N, Aarnoutse R, Diacon AH, Dawson R, Rehal S, et al. High-dose rifampicin, moxifloxacin, and SQ109 for treating tuberculosis: a multi-arm, multi-stage randomised controlled trial. *Lancet Infect Dis* [Internet]. 2017 Jan;17(1):39–49. Available from: NS -
11. Buu TN, Huyen MNT, van Soolingen D, Lan NTN, Quy HT, Tiemersma EW, et al. The Mycobacterium tuberculosis Beijing genotype does not affect tuberculosis treatment failure in Vietnam. *Clin Infect Dis* [Internet]. 2010 Oct;51(8):879–86. Available from: NS -
12. Centers for Disease Control (CDC). Patients with recurrent tuberculosis. *MMWR Morb Mortal Wkly Rep* [Internet]. 1982 Jan 8;30(52):645–7. Available from: <http://www.ncbi.nlm.nih.gov/pubmed/6798413>
13. Chen RY, Dodd LE, Lee M, Paripati P, Hammoud DA, Mountz JM, et al. PET/CT imaging correlates with treatment outcome in patients with multidrug-resistant tuberculosis. *Sci Transl Med* [Internet]. 2014 Dec;6(265):265ra166. Available from: NS -
14. de Siqueira HR, de Freitas FAD, de Oliveira DN, Barreto AMW, Dalcolmo MP, Albano RM, et al. Clinical evolution of a group of patients with multidrug-resistant TB treated at a referral center in the city of Rio de Janeiro, Brazil. *J Bras Pneumol publicacao Of da Soc Bras Pneumol e Tisiologia* [Internet]. 2009 Jan;35(1):54–62. Available from: NS -
15. Dooley KE, Lahlou O, Ghali I, Knudsen J, Elmessaoudi MD, Cherkaoui I, et al. Risk factors for tuberculosis treatment failure, default, or relapse and outcomes of retreatment in Morocco. *BMC Public Health* [Internet]. 2011 Feb;11(PG-140):140. Available from: NS -
16. Edwards BD, Edwards J, Cooper R, Kunimoto D, Somayaji R, Fisher D. Incidence, treatment, and outcomes of isoniazid mono-resistant Mycobacterium tuberculosis infections in Alberta, Canada from 2007-2017. *PLoS One*. 2020;15(3):e0229691.
17. Evangelista M do SN, Maia R, Toledo JP, Abreu RG de, Barreira D. Tuberculosis associated with diabetes mellitus by age group in Brazil: a retrospective cohort study, 2007-2014. *Brazilian J Infect Dis an Off Publ Brazilian Soc Infect Dis*. 2020;24(2):130–6.
18. Gadoev J, Asadov D, Harries AD, Parpieva N, Tayler-Smith K, Isaakidis P, et al. Recurrent tuberculosis and associated factors: A five - year countrywide study in Uzbekistan. *PLoS One* [Internet]. 2017;12(5):e0176473. Available from: NS -
19. Ginafon M, Tawo L, Kassa F, Monteiro GP, Zellweger JP, Shang H, et al. Outcome of tuberculosis retreatment in routine conditions in Cotonou, Benin. *Int J Tuberc Lung Dis* [Internet]. 2004 Oct;8(10):1242–7. Available from: NS -
20. Gupta A, Wood R, Kaplan R, Bekker L-G, Lawn SD. Tuberculosis incidence rates during 8 years of follow-up of an antiretroviral treatment cohort in South Africa: comparison with rates in the community. *PLoS One* [Internet]. 2012;7(3):e34156. Available from: <http://www.ncbi.nlm.nih.gov/pubmed/22479548>
21. Gupta SN, Gupta N, Gupta S. Surveillance data analysis of Revised National Tuberculosis Control Program of Kangra, Himachal Pradesh. *J Fam Med Prim care* [Internet]. 2013 Jul;2(3):250–5. Available from: <http://www.ncbi.nlm.nih.gov/pubmed/24479092>
22. Hamusse SD, Demissie M, Teshome D, Lindtjörn B. Fifteen-year trend in treatment outcomes among patients with pulmonary smear-positive tuberculosis and its determinants in Arsi Zone, Central Ethiopia. *Glob Health Action* [Internet]. 2014;7(PG-25382):25382. Available from: NS -
23. Harries AD, Salaniponi FM, AD. H, FM. S, Harries AD, Salaniponi FM. Recurrent tuberculosis in Malawi: improved diagnosis and management following operational research. *Trans R Soc Trop Med Hyg* [Internet]. 2001;95(5):503–4. Available from: NS -
24. Huang H-Y, Tsai Y-S, Lee J-J, Chiang M-C, Chen Y-H, Chiang C-Y, et al. Mixed infection with Beijing and non-Beijing strains and drug resistance pattern of Mycobacterium tuberculosis. *J Clin Microbiol* [Internet]. 2010 Dec;48(12):4474–80. Available from: NS -
25. Joseph MR, Thomas RA, Nair S, Balakrishnan S, Jayasankar S, MR. J, et al. Directly observed treatment short course for tuberculosis. What happens to them in the long term? *Indian J Tuberc* [Internet]. 2015 Jan;62(1):29–35. Available from: NS -

26. Knoblauch AM, Grandjean Lapiere S, Randriamanana D, Raheison MS, Rakotoson A, Raholijaona BS, et al. Multidrug-resistant tuberculosis surveillance and cascade of care in Madagascar: a five-year (2012-2017) retrospective study. *BMC Med*. 2020 Jun;18(1):173.
27. Lampalo M, Jukić I, Bingulac-Popović J, Stanić HS, Barišić B, Popović-Grle S. THE ROLE OF CIGARETTE SMOKING AND ALCOHOL CONSUMPTION IN PULMONARY TUBERCULOSIS DEVELOPMENT AND RECURRENCE. *Acta Clin Croat*. 2019 Dec;58(4):590-4.
28. Lee JHJ, Lee C-HC-T, Kim DK, Yoon H II, Kim JY, Lee S-M, et al. Retrospective comparison of levofloxacin and moxifloxacin on multidrug-resistant tuberculosis treatment outcomes. *Korean J Intern Med [Internet]*. 2011 Jun;26(2):153-9. Available from: NS -
29. Marx FM, Dunbar R, Enarson DA, Beyers N, FM. M, R. D, et al. The rate of sputum smear-positive tuberculosis after treatment default in a high-burden setting: a retrospective cohort study. *PLoS One [Internet]*. 2012;7(9):e45724. Available from: NS -
30. Mejuto B, Tuñez V, Del Molino MLP, García R. Characterization and evaluation of the directly observed treatment for tuberculosis in Santiago de Compostela (1996-2006). *Risk Manag Healthc Policy [Internet]*. 2010;3(PG-21-6):21-6. Available from: NS -
31. Mjid M, Hedhli A, Zakhma M, Zribi M, Ouahchi Y, Toujani S, et al. [Clinical and microbiological profile of patients experiencing relapses of tuberculosis in Tunisia]. *Rev Pneumol Clin*. 2018 Feb;
32. Mpagama SG, Lekule IA, Mbuya AW, Kisonga RM, Heysell SK, SG. M, et al. The Influence of Mining and Human Immunodeficiency Virus Infection Among Patients Admitted for Retreatment of Tuberculosis in Northern Tanzania. *Am J Trop Med Hyg [Internet]*. 2015 Aug;93(2 PG-212-5):212-5. Available from: NS -
33. Mukherjee A, Khandelwal D, Singla M, Lodha R, Kabra SK, A. M, et al. Outcomes of Category II anti-tuberculosis treatment in Indian children. *Int J Tuberc Lung Dis [Internet]*. 2015 Oct;19(10):1153-7. Available from: NS -
34. Mukherjee A, Sarkar A, Saha I, Biswas B, Bhattacharyya PS. Outcomes of different subgroups of smear-positive retreatment patients under RNTCP in rural West Bengal, India. *Rural Remote Health [Internet]*. 2009;9(1):926. Available from: <http://www.ncbi.nlm.nih.gov/pubmed/19260766>
35. Munje R, Deshmukh R, Tumane K, R. M, R. D, K. T. Multidrug-resistant TB among previously treated TB cases: A retrospective study in Nagpur, India. *Indian J Tuberc [Internet]*. 2015 Oct;62(4):207-10. Available from: NS -
36. Mutembo S, Mutanga JN, Musokotwane K, Kanene C, Dobbins K, Yao X, et al. Urban-rural disparities in treatment outcomes among recurrent TB cases in Southern Province, Zambia. *BMC Infect Dis*. 2019 Dec;19(1):1087.
37. N'guessan K, Ahui Brou JM, Assi JS, Adagra GD, Adade O, Assande JM, et al. Use of rapid molecular test for multidrug-resistant tuberculosis detection among relapse cases in Cote d'Ivoire. *Int J mycobacteriology [Internet]*. 2014 Mar;3(1):71-5. Available from: NS -
38. Nakanwagi-Mukwanya A, Reid AJ, Fujiwara PI, Mugabe F, Kosgei RJ, Tayler-Smith K, et al. Characteristics and treatment outcomes of tuberculosis retreatment cases in three regional hospitals, Uganda. *Public Heal action [Internet]*. 2013 Jun;3(2):149-55. Available from: NS -
39. Nunn AJ, Phillips PPJ, Mitchison DA, AJ. N, PP. P, DA. M. Timing of relapse in short-course chemotherapy trials for tuberculosis. *Int J Tuberc Lung Dis [Internet]*. 2010 Feb;14(2 PG-241-2):241-2. Available from: NS -
40. Omotosho BA, Adebayo AM, Adeniyi BO, Ayodeji OO, Ilesanmi OS, Kareem AO, et al. Tuberculosis treatment outcomes and interruption among patients assessing DOTS regimen in a tertiary hospital in semi-urban area of south-western Nigeria. *Niger J Med [Internet]*. 2014;23(1):51-6. Available from: NS -
41. Reed GW, Choi H, Lee SY, Lee M, Kim Y, Park H, et al. Impact of diabetes and smoking on mortality in tuberculosis. *PLoS One [Internet]*. 2013;8(2):e58044. Available from: NS -
42. Reis-Santos B, Gomes T, Locatelli R, de Oliveira ER, Sanchez MN, Horta BL, et al. Treatment outcomes in tuberculosis patients with diabetes: a polytomous analysis using Brazilian surveillance system. *PLoS One*. 2014;9(7):e100082.
43. Ribeiro Macedo L, Reis-Santos B, Riley LW, Maciel EL, L. RM, B. R-S, et al. Treatment outcomes of tuberculosis patients in Brazilian prisons: a polytomous regression analysis. *Int J Tuberc Lung Dis [Internet]*. 2013 Nov;17(11):1427-34. Available from: NS -
44. Sharma P, Verma M, Bhilwar M, Shekhar H, Roy N, Verma A, et al. Epidemiological profile of tuberculosis patients in Delhi, India: A retrospective data analysis from the directly observed treatment short-course (DOTS) center. *J Fam Med Prim care*. 2019 Oct;8(10):3388-92.
45. Sonnenberg P, Murray J, Shearer S, Glynn JR, Kambashi B, Godfrey-Faussett P. Tuberculosis treatment failure and drug resistance--same strain or reinfection? *Trans R Soc Trop Med Hyg [Internet]*. 2000;94(6 PG-603-7):603-7. Available from: <http://www.ncbi.nlm.nih.gov/pubmed/11198641>
46. Su W-J, Feng J-Y, Huang C-C, Perng R-P, WJ. S, JY. F, et al. Increasing drug resistance of Mycobacterium tuberculosis isolates in a medical center in northern Taiwan. *J Formos Med Assoc [Internet]*. 2008 Mar;107(3):259-64. Available from: NS -
47. Sungkanuparph S, Manosuthi W, Kiertiburanakul S, Vibhagool A, S. S, W. M, et al. Initiation of antiretroviral therapy in advanced AIDS with active tuberculosis: clinical experiences from Thailand. *J Infect [Internet]*. 2006 Mar;52(3):188-94. Available from: NS -
48. Takarinda KC, Harries AD, Srinath S, Mutasa-Apollo T, Sandy C, Mugurungi O, et al. Treatment outcomes of adult patients with recurrent tuberculosis in relation to HIV status in Zimbabwe: a retrospective record review. *BMC Public Health [Internet]*. 2012 Feb;12(PG-124):124. Available from: NS -
49. Toledano Grave de Peralta Y, Assef Forment S, Benítez Sánchez E, Del Campo Mulet E, Nápoles Smith N. Recaída y factores de riesgo asociados en pacientes con tuberculosis en Santiago de Cuba (2002-2008) TT - Relapse and associated risk factors in patients with tuberculosis in Santiago de Cuba (2002-2008). *MEDISAN [Internet]*. 2010;14(8):1045-53. Available from: [http://scielo.sld.cu/scielo.php?script=sci\\_arttext&pid=S1029-30192010000800001&lang=pt](http://scielo.sld.cu/scielo.php?script=sci_arttext&pid=S1029-30192010000800001&lang=pt)
50. Turkova A, Chappell E, Chalermpanmetagul S, Negra M Della, Volokha A, Primak N, et al. Tuberculosis in HIV-infected children in Europe, Thailand and Brazil: paediatric TB-HIV EuroCoord study. *Int J Tuberc Lung Dis [Internet]*. 2016 Nov;20(11 PG-1448-1456):1448-56. Available from: NS -
51. Van Deun A, Decroo T, Kya Jai Maug A, Hossain MA, Gumusboga M, Mulders W, et al. The perceived impact of isoniazid resistance on outcome of first-line rifampicin-throughout regimens is largely due to missed rifampicin resistance. *PLoS One*. 2020;15(5):e0233500.
52. Van Rie A, Sabue M, Jarrett N, Westreich D, Behets F, Kokolomani J, et al. Counseling and testing TB patients for HIV: evaluation of three implementation models in Kinshasa, Congo. *Int J Tuberc Lung Dis [Internet]*. 2008 Mar;12(3 Suppl 1):73-8. Available from: NS -
53. Varela-Martínez C, Yadon ZE, Marín D, Helda E. Contrasting trends of tuberculosis in the cities of San Pedro Sula and Tegucigalpa, Honduras, 2005-2014. *Rev Panam Salud Publica [Internet]*. 2016 Jan;39(1):51-9. Available from: NS -

54. Wang Q, Pang Y, Jing W, Liu Y, Wang N, Yin H, et al. Clofazimine for Treatment of Extensively Drug-Resistant Pulmonary Tuberculosis in China. *Antimicrob Agents Chemother*. 2018 Apr;62(4).
55. Zhang L, Meng Q, Chen S, Zhang M, Chen B, Wu B, et al. Treatment outcomes of multidrug-resistant tuberculosis patients in Zhejiang, China, 2009-2013. *Clin Microbiol Infect* [Internet]. 2017 Jul;(PG-). Available from: NS -
56. Zille AI, Werneck GL, Luiz RR, Conde MB. Social determinants of pulmonary tuberculosis in Brazil: an ecological study. *BMC Pulm Med*. 2019 May;19(1):87.

*Extra pulmonary TB as first TB episode*

1. Alavi SM, Bakhtiyariniya P, Eghtesad M, Salmanzadeh S. Prevalence of pulmonary tuberculosis before and after soil dust in Khuzestan, southwest Iran. *Casp J Intern Med*. 2014;5(4):190-5.
2. Ali M, Howady F, Munir W, Karim H, Al-Suwaidi Z, Al-Maslamani M, et al. Drug-resistant tuberculosis: an experience from Qatar. *Libyan J Med*. 2020 Dec;15(1):1744351.
3. Anderson LF, Tamne S, Watson JP, Cohen T, Mitnick C, Brown T, et al. Treatment outcome of multi-drug resistant tuberculosis in the United Kingdom: retrospective-prospective cohort study from 2004 to 2007. *Euro Surveill* [Internet]. 2013 Oct;18(40). Available from: NS -
4. Bang D, Andersen AB, Thomsen VO, Lillebaek T. Recurrent tuberculosis in Denmark: relapse vs. re-infection. *Int J Tuberc Lung Dis*. 2010 Apr;14(4):447-53.
5. Blondal K, Viiklepp P, Guethmundsson LJ, Altraja A, K. B. P. V, et al. Predictors of recurrence of multidrug-resistant and extensively drug-resistant tuberculosis. *Int J Tuberc Lung Dis* [Internet]. 2012 Sep;16(9):1228-33. Available from: NS -
6. Burgos M, Gonzalez LC, Paz EA, Gournis E, Kawamura LM, Schechter G, et al. Treatment of multidrug-resistant tuberculosis in San Francisco: an outpatient-based approach. *Clin Infect Dis* [Internet]. 2005 Apr;40(7 PG-968-75):968-75. Available from: NS -
7. Chaisson RE, Clermont HC, Holt EA, Cantave M, Johnson MP, Atkinson J, et al. Six-Month Supervised Intermittent Tuberculosis Therapy in Haitian Patients With and Without HIV Infection. 1996;154:1034-8.
8. Chan CK, Wong KH, Leung CC, Tam CM, Chan KCW, Pang KW, et al. Treatment outcomes after early initiation of antiretroviral therapy for human immunodeficiency virus-associated tuberculosis. *Hong Kong Med J = Xianggang yi xue za zhi* [Internet]. 2013 Dec;19(6):474-83. Available from: NS -
9. Chien J-Y, Chien S-T, Huang S-Y, Yu C-J, JY. C. ST. C, et al. Safety of rifabutin replacing rifampicin in the treatment of tuberculosis: a single-centre retrospective cohort study. *J Antimicrob Chemother* [Internet]. 2014 Mar;69(3):790-6. Available from: NS -
10. D'Arc L. Smoking increases the risk of relapse after successful tuberculosis treatment. *Int J Epidemiol* 2008; 37: 841-51.
11. Dobler CC, Crawford AB, Jeffs PJ, Gilbert GL, Marks GB. Recurrence of tuberculosis in a low-incidence setting. *Eur Respir J* 2009; 33: 160-7.
12. Doltu S, Ciobanu A, Sereda Y, Persian R, Ravenscroft L, Kasyan L, et al. Short and long-term outcomes of video observed treatment in tuberculosis patients, the Republic of Moldova. *J Infect Dev Ctries* [Internet]. 2021 Sep 29;15(09.1):17S-24S. Available from: <https://pubmed.ncbi.nlm.nih.gov/34609956/>
13. Escalante P, Graviss EA, Griffith DE, Musser JM, Awe RJ. Treatment of isoniazid-resistant tuberculosis in southeastern Texas. *Chest* [Internet]. 2001 Jun;119(6 PG-1730-6):1730-6. Available from: NS -
14. Gan SH, KhinMar KW, Ang LW, Lim LKY, Sng LH, Wang YT, et al. Recurrent Tuberculosis Disease in Singapore. *Open Forum Infect Dis* [Internet]. 2021 Jul 1;8(7):ofab340. Available from: <https://pubmed.ncbi.nlm.nih.gov/34307732/>
15. Garcia Ordonez MA, Martinez Gonzalez J, Orihuela Canadas F, Jimenez Onate F, Colmenero Castillo JD. [Recurrent tuberculosis in patients with coinfection by HIV]. *Rev Clin Esp*. 2003 Jun;203(6):279-83.
16. Glynn JR, Murray J, Bester A, Nelson G, Shearer S, Sonnenber P. High rates of recurrence in HIV-infected and HIV-uninfected patients with tuberculosis. *J Infect Dis* 2010; 201: 704-11.
17. Guerra-Assunção JA, Houben RMGJ, Crampin AC, et al. Recurrence due to Relapse or Reinfection With Mycobacterium tuberculosis : A Whole-Genome Sequencing Approach in a Large , Population- Based Cohort With a High HIV Infection Prevalence and Active Follow-up. *J Infect Dis* 2015; 211: 1154-63.
18. Heijden YF Van Der, Karim F, Chinappa T, Mufamadi G, Zako L, Shepherd BE. Older age at first tuberculosis diagnosis is associated with tuberculosis recurrence in HIV-negative persons. 2018; 22: 871-7.
19. Hermans SM, Zinyakatira N, Caldwell J, Cobelens FGJ, Boule A, Wood R. High rates of recurrent TB disease: a population-level cohort study. *Clin Infect Dis an Off Publ Infect Dis Soc Am*. 2020 Apr;
20. Houben RMGJ, Glynn JR, Mboma S, et al. The impact of HIV and ART on recurrent tuberculosis in a sub-Saharan setting. *AIDS* 2012; 26: 2233-9.
21. Huddart S, Singh M, Jha N, Benedetti A, Pai M. Case fatality and recurrent tuberculosis among patients managed in the private sector: A cohort study in Patna, India. Bajpai RC, editor. *PLoS One* [Internet]. 2021 Mar 26;16(3):e0249225. Available from: <https://pubmed.ncbi.nlm.nih.gov/33770134/>
22. Jenks JD, Kumarasamy N, Ezhilarasi C, Poongulali S, Ambrose P, Yepthomi T, et al. Improved tuberculosis outcomes with daily vs. intermittent rifabutin in HIV-TB coinfecting patients in India. *Int J Tuberc Lung Dis* [Internet]. 2016 Sep;20(9):1181-4. Available from: NS -
23. Jones BE, Otaya M, Antoniskis D, Sian S, Wang F, Mercado A, et al. A prospective evaluation of antituberculosis therapy in patients with human immunodeficiency virus infection. *Am J Respir Crit Care Med* [Internet]. 1994 Dec;150(6 Pt 1):1499-502. Available from: NS -
24. Kherad O, Herrmann FR, Zellweger J-P, Rochat T, Janssens J-P. Clinical presentation, demographics and outcome of tuberculosis (TB) in a low incidence area: a 4-year study in Geneva, Switzerland. *BMC Infect Dis* [Internet]. 2009 Dec;9(PG-217):217. Available from: NS -
25. Kim CH, Lim JK, Lee DH, Yoo SS, Lee SY, Cha SI, et al. Outcomes of standard and tailored anti-tuberculosis regimens in patients with tuberculous pleural effusion. *Int J Tuberc Lung Dis* [Internet]. 2016 Nov;20(11):1516-21. Available from: NS -
26. Lado Lado FL, Prieto Martinez A, Cabarcos Ortiz De Barron A, Carballo Arceo E, Barrio Gomez E. [Recurrence of tuberculosis in patients infected with the human immunodeficiency virus]. *An Med Interna*. 2001 May;18(5):243-7.
27. Leung CC, Yew WW, Chan CK, Chang KC, Law WS, Lee SN, et al. Smoking adversely affects treatment response, outcome and relapse in tuberculosis. *Eur Respir J* [Internet]. 2015 Mar;45(3 PG-738-45):738-45. Available from: NS -
28. Leung CC, Yew WW, Mok TYW, Lau KS, Wong CF, Chau CH, et al. Effects of diabetes mellitus on the clinical presentation and treatment response in tuberculosis. *Respirology* [Internet]. 2017 Aug;22(6):1225-32. Available from: NS -

29. Li J, Munsiff SS, Driver CR, Sackoff J, J. L, SS. M, et al. Relapse and acquired rifampin resistance in HIV-infected patients with tuberculosis treated with rifampin- or rifabutin-based regimens in New York City, 1997-2000. *Clin Infect Dis* [Internet]. 2005 Jul;41(1 PG-83-91):83-91. Available from: NS -
30. Mallory KF, Churchyard GJ, Kleinschmidt I, De Cock KM, Corbett EL, KF. M, et al. The impact of HIV infection on recurrence of tuberculosis in South African gold miners. *Int J Tuberc Lung Dis* [Internet]. 2000 May;4(5 PG-455-62):455-62. Available from: NS -
31. Meyssonier V, Bui T Van, Veziris N, Jarlier V, Robert J. Rifampicin mono-resistant tuberculosis in France: a 2005-2010 retrospective cohort analysis. *BMC Infect Dis* [Internet]. 2014 Jan;14(PG-18):18. Available from: NS -
32. Munsiff SS, Ahuja SD, Li J, Driver CR. Public-private collaboration for multidrug-resistant tuberculosis control in New York City. *Int J Tuberc Lung Dis* [Internet]. 2006 Jun;10(6):639-48. Available from: NS -
33. Ormerod LP, Prescott RJ. Inter-relations between relapses, drug regimens and compliance with treatment in tuberculosis. *Respir Med* [Internet]. 1991 May;85(3):239-42. Available from: NS -
34. Park JS, Lee J-YH, Lee YJ, Kim SJ, Cho Y-J, Yoon H II, et al. Serum Levels of Antituberculosis Drugs and Their Effect on Tuberculosis Treatment Outcome. *Antimicrob Agents Chemother* [Internet]. 2015 Oct;60(1):92-8. Available from: NS -
35. Reves R, Heilig CM, Tapy JM, Bozeman L, Kyle RP, Hamilton CD, et al. Intermittent tuberculosis treatment for patients with isoniazid intolerance or drug resistance. *Int J Tuberc Lung Dis* [Internet]. 2014 May;18(5 PG-571-80):571-80. Available from: NS -
36. Romanowski K, Chiang LY, Roth DZ, Krajdin M, Tang P, Cook VJ, et al. Treatment outcomes for isoniazid-resistant tuberculosis under program conditions in British Columbia, Canada. *BMC Infect Dis*. 2017 Sep;17(1):604.
37. Rosser A, Richardson M, Wiselka MJ, et al. A nested case-control study of predictors for tuberculosis recurrence in a large UK Centre. *BMC Infect Dis* 2018; **18**: 94.
38. S. P, KW. J, SD. L, WS. K, TS. S. Treatment outcomes of rifampin-sparing treatment in patients with pulmonary tuberculosis with rifampin-mono-resistance or rifampin adverse events: A retrospective cohort analysis. *Respir Med* [Internet]. 2017;131(PG-43-48):43-8. Available from: NS -
39. Schechter MC, Bizune D, Kagei M, Holland DP, Del Rio C, Yamin A, et al. Challenges Across the HIV Care Continuum for Patients With HIV/TB Co-infection in Atlanta, GA [corrected]. *Open forum Infect Dis*. 2018 Apr;5(4):ofy063.
40. Small PM, Schechter GF, Goodman PC, Sande MA, Chaisson RE, Hopewell PC. Treatment of tuberculosis in patients with advanced human immunodeficiency virus infection. *N Engl J Med* [Internet]. 1991 Jan;324(5 PG-289-94):289-94. Available from: NS -
41. Stagg HR, Bothamley GH, Davidson JA, Kunst H, Lalor MK, Lipman MC, et al. Fluoroquinolones and isoniazid-resistant tuberculosis: implications for the 2018 WHO guidance. *Eur Respir J*. 2019 Oct;54(4).
42. Sterling TR, Alwood K, Gachuhi R, Coggin W, Blazes D, Bishai WR, et al. Relapse rates after short-course (6-month) treatment of tuberculosis in HIV-infected and uninfected persons. *AIDS* [Internet]. 1999 Oct;13(14 PG-1899-904):1899-904. Available from: NS -
43. Swaminathan S, Narendran G, Venkatesan P, Iliayas S, Santhanakrishnan R, Menon PA, et al. Efficacy of a 6-month versus 9-month intermittent treatment regimen in HIV-infected patients with tuberculosis: a randomized clinical trial. *Am J Respir Crit Care Med* [Internet]. 2010 Apr;181(7 PG-743-51):743-51. Available from: NS -
44. Swaminathan S, Raghavan A, Duraipandian M, Kripasankar AS, Ramachandran P. Short-course chemotherapy for paediatric respiratory tuberculosis: 5-year report. *Int J Tuberc Lung Dis* [Internet]. 2005 Jun;9(6):693-6. Available from: NS -
45. Te Water Naude JM, Donald PR, Hussey GD, Kibel MA, Louw A, Perkins DR, et al. Twice weekly vs. daily chemotherapy for childhood tuberculosis. *Pediatr Infect Dis J* [Internet]. 2000 May;19(5 PG-405-10):405-10. Available from: NS -
46. Uys P, Brand H, Warren R, van der Spuy G, Hoal EG, van Helden PD, et al. The Risk of Tuberculosis Reinfection Soon after Cure of a First Disease Episode Is Extremely High in a Hyperendemic Community. *PLoS One* [Internet]. 2015;10(12 PG-e0144487):e0144487. Available from: NS -
47. Verver S, Warren RM, Beyers N, Richardson M, van der Spuy GD, Borgdorff MW, et al. Rate of reinfection tuberculosis after successful treatment is higher than rate of new tuberculosis. *Am J Respir Crit Care Med* [Internet]. 2005 Jun;171(12 PG-1430-5):1430-5. Available from: NS -
48. Yen Y-F, Yen M-Y, Lin Y-S, et al. Smoking increases risk of recurrence after successful anti-tuberculosis treatment: a population-based study. *Int J Tuberc Lung Dis* 2014; **18**: 492-8.
49. Zhdanov V, Bilenko N, Mor Z. Risk Factors for Recurrent Tuberculosis among Successfully Treated Patients in Israel, 1999 – 2011. *Isr Med Assoc J* 2017; **19**: 237-41

*Treatment success for first episode cannot be confirmed*

1. A controlled trial of 2-month, 3-month, and 12-month regimens of chemotherapy for sputum-smear-negative pulmonary tuberculosis. Results at 60 months. *Am Rev Respir Dis*. 1984 Jul;130(1):23-8.
2. A controlled trial of 6 months' chemotherapy in pulmonary tuberculosis. Final report: results during the 36 months after the end of chemotherapy and beyond. British Thoracic Society. *Br J Dis Chest*. 1984 Oct;78(4):330-6.
3. Afshar B, Carless J, Roche A, Balasegaram S, Anderson C. Surveillance of tuberculosis (TB) cases attributable to relapse or reinfection in London, 2002-2015. *PLoS One*. 2019;14(2):e0211972.
4. Arsang-Jang S, Mansourian M, Amani F, Jafari-Koshki T, S. A-J, M. M, et al. Epidemiologic Trend of Smear-Positive, Smear-Negative, Extra Pulmonary and Relapse of Tuberculosis in Iran (2001-2015); A Repeated Cross-Sectional Study. *J Res Health Sci* [Internet]. 2017 May;17(2):e00380. Available from: NS -
5. Caminero JA, Pavón JM, Rodríguez de Castro F, Díaz F, Julià G, Caylá JA, et al. Evaluation of a directly observed six months fully intermittent treatment regimen for tuberculosis in patients suspected of poor compliance. *Thorax* [Internet]. 1996 Nov;51(11):1130-3. Available from: NS -
6. Controlled clinical trial comparing a 6-month and a 12-month regimen in the treatment of pulmonary tuberculosis in the Algerian Sahara. Algerian working group/British Medical Research Council cooperative study. *Am Rev Respir Dis*. 1984 Jun;129(6):921-8.
7. Cox H, Kebede Y, Allamuratova S, Ismailov G, Davletmuratova Z, Byrnes G, et al. Tuberculosis recurrence and mortality after successful treatment: impact of drug resistance. *PLoS Med* [Internet]. 2006 Oct;3(10 PG-e384):e384. Available from: NS -
8. Crofts JP, Andrews NJ, Barker RD, Delpech V, Abubakar I, JP. C, et al. Risk factors for recurrent tuberculosis in England and Wales, 1998-2005. *Thorax* [Internet]. 2010 Apr;65(4 PG-310-4):310-4. Available from: NS -
9. Dutt AK, Moers D, Stead WW, AK. D, D. M, WW. S. Smear- and culture-negative pulmonary tuberculosis: four-month short-course chemotherapy. *Am Rev Respir Dis* [Internet]. 1989 Apr;139(4 PG-867-70):867-70. Available from: NS -

10. Five-Year Follow-Up of a Controlled Trial of Five 6-Month Regimens of Chemotherapy for Pulmonary Tuberculosis. *Am Rev Respir Dis* [Internet]. 1987 Dec;136(6):1339–42. Available from: <http://www.atsjournals.org/doi/abs/10.1164/ajrccm/136.6.1339>
11. Garcia de Viedma D, Marin M, Hernangomez S, Diaz M, Ruiz Serrano MJ, Alcala L, et al. Tuberculosis recurrences: reinfection plays a role in a population whose clinical/epidemiological characteristics do not favor reinfection. *Arch Intern Med* [Internet]. 2002 Sep;162(16 PG-1873–9):1873–9. Available from: NS -
12. Golub JE, Durovni B, King BS, Cavalacante SC, Pacheco AG, Moulton LH, et al. Recurrent tuberculosis in HIV-infected patients in Rio de Janeiro, Brazil. *AIDS* [Internet]. 2008 Nov;22(18 PG-2527–33):2527–33. Available from: NS -
13. Hopewell PC, Ganter B, Baron RB, Sanchez-Hernandez M, PC. H, B. G, et al. Operational evaluation of treatment for tuberculosis. Results of 8- and 12-month regimens in Peru. *Am Rev Respir Dis* [Internet]. 1985 Oct;132(4 PG-737–41):737–41. Available from: NS -
14. Hopewell PC, Sanchez-Hernandez M, Baron RB, Ganter B, PC. H, M. S-H, et al. Operational evaluation of treatment for tuberculosis. Results of a “standard” 12-month regimen in Peru. *Am Rev Respir Dis* [Internet]. 1984 Mar;129(3 PG-439–43):439–43. Available from: NS -
15. Hung C-L, Chien J-Y, Ou C-Y, CL. H, JY. C, CY. O, et al. Associated factors for tuberculosis recurrence in Taiwan: a nationwide nested case-control study from 1998 to 2010. *PLoS One* [Internet]. 2015;10(5 PG-e0124822):e0124822. Available from: NS -
16. Jee SH, Golub JE, Jo J, Park IS, Ohrr H, Samet JM, et al. Smoking and risk of tuberculosis incidence, mortality, and recurrence in South Korean men and women. *Am J Epidemiol* [Internet]. 2009 Dec;170(12):1478–85. Available from: NS -
17. Ji Y, Shao C, Cui Y, Shao G, Zheng J. 18F-FDG Positron-Emission Tomography/Computed Tomography Findings of Radiographic Lesions Suggesting Old Healed Pulmonary Tuberculosis and High-risk Signs of Predicting Recurrence: A Retrospective Study. *Sci Rep*. 2019 Aug;9(1):12582.
18. Kim L, Moonan PK, Yelk Woodruff RS, Kammerer JS, Haddad MB, L. K, et al. Epidemiology of recurrent tuberculosis in the United States, 1993–2010. *Int J Tuberc Lung Dis* [Internet]. 2013 Mar;17(3):357–60. Available from: NS -
19. Kopanoff DE, Snider DEJ, Johnson M, DE. K, DE. S, M. J. Recurrent tuberculosis: why do patients develop disease again? A United States Public Health Service cooperative survey. *Am J Public Health* [Internet]. 1988 Jan;78(1 PG-30–3):30–3. Available from: NS -
20. Korhonen V, Smit PW, Haanpera M, Casali N, Ruutu P, Vasankari T, et al. Whole genome analysis of *Mycobacterium tuberculosis* isolates from recurrent episodes of tuberculosis, Finland, 1995–2013. *Clin Microbiol Infect* [Internet]. 2016 Jun;22(6):549–54. Available from: NS -
21. Korhonen V, Soini H, Vasankari T, Ollgren J, Smit PW, Ruutu P. Recurrent tuberculosis in Finland 1995–2013: a clinical and epidemiological cohort study. *BMC Infect Dis* [Internet]. 2017 Nov;17(1 PG-721):721. Available from: NS -
22. Lahey T, Mackenzie T, Arbeit RD, Bakari M, Mtei L, Matee M, et al. Recurrent tuberculosis risk among HIV-infected adults in Tanzania with prior active tuberculosis. *Clin Infect Dis* [Internet]. 2013 Jan;56(1 PG-151–8):151–8. Available from: NS -
23. Mehta S, Mugusi FM, Bosch RJ, Aboud S, Urassa W, Villamor E, et al. Vitamin D status and TB treatment outcomes in adult patients in Tanzania: a cohort study. *BMJ Open*. 2013 Nov;3(11):e003703.
24. Micheletti VCD, Kritski AL, Braga JU, VC. M, AL. K, JU. B, et al. Clinical Features and Treatment Outcomes of Patients with Drug-Resistant and Drug-Sensitive Tuberculosis: A Historical Cohort Study in Porto Alegre, Brazil. *PLoS One* [Internet]. 2016;11(8 PG-e0160109):e0160109. Available from: NS -
25. Middelkoop K, Bekker L-G, Shashkina E, Kreiswirth B, Wood R. Retreatment tuberculosis in a South African community: the role of re-infection, HIV and antiretroviral treatment. *Int J Tuberc Lung Dis* [Internet]. 2012 Nov;16(11):1510–6. Available from: NS -
26. Okwera A, Johnson JL, Luzze H, Nsubuga P, Kayanja H, Cohn DL, et al. Comparison of intermittent ethambutol with rifampicin-based regimens in HIV-infected adults with PTB, Kampala. *Int J Tuberc Lung Dis* [Internet]. 2006 Jan;10(1):39–44. Available from: NS -
27. Study of a fully supervised programme of chemotherapy for pulmonary tuberculosis given once weekly in the continuation phase in the rural areas of Hong Kong. *Tubercle*. 1984 Mar;65(1):5–15.
28. Varghese B, al-Omari R, Grimshaw C, Al-Hajoj S, B. V, R. al-O, et al. Endogenous reactivation followed by exogenous re-infection with drug resistant strains, a new challenge for tuberculosis control in Saudi Arabia. *Tuberculosis (Edinb)* [Internet]. 2013 Mar;93(2):246–9. Available from: NS -
29. Weis SE, Slocum PC, Blais FX, King B, Nunn M, Matney GB, et al. The Effect of Directly Observed Therapy on the Rates of Drug Resistance and Relapse in Tuberculosis. *N Engl J Med* [Internet]. 1994 Apr;330(17):1179–84. Available from: <http://www.nejm.org/doi/abs/10.1056/NEJM199404283301702>
30. Wingfield T, Boccia D, Tovar M, Gavino A, Zevallos K, Montoya R, et al. Defining catastrophic costs and comparing their importance for adverse tuberculosis outcome with multi-drug resistance: a prospective cohort study, Peru. *PLoS Med*. 2014 Jul;11(7):e1001675.
31. Yee DP, Menzies D, Brassard P. Clinical outcomes of pyrazinamide-mono-resistant *Mycobacterium tuberculosis* in Quebec. *Int J Tuberc Lung Dis* [Internet]. 2012 May;16(5):604–9. Available from: NS -

*Excluded recurrences occurring in the first months after treatment success*

1. Brugueras S, Molina V-I, Casas X, González Y-D, Forcada N, Romero D, et al. Tuberculosis recurrences and predictive factors in a vulnerable population in Catalonia. *PLoS One*. 2020;15(1):e0227291.
2. Chen M-Y, Lo Y-C, Chen W-C, Wang K-F, Chan P-C, MY. C, et al. Recurrence after Successful Treatment of Multidrug-Resistant Tuberculosis in Taiwan. *PLoS One* [Internet]. 2017;12(1):e0170980. Available from: NS -
3. Chen Q, Peng L, Xiong G, Peng Y, Luo D, Zou L, et al. Recurrence Is a Noticeable Cause of Rifampicin-Resistant *Mycobacterium tuberculosis* in the Elderly Population in Jiangxi, China. *Front public Heal*. 2019;7:182.
4. Dobler CC, Marks GB, Simpson SE, Crawford ABH. Recurrence of tuberculosis at a Sydney chest clinic between 1994 and 2006: reactivation or reinfection? *Med J Aust* [Internet]. 2008 Feb;188(3):153–5. Available from: NS -
5. Du J, Zhang L, Ma Y, Chen X-Y, Ge Q-P, Tian X-Z, et al. Treatment and recurrence on re-treatment tuberculosis patients: a randomized clinical trial and 7-year perspective cohort study in China. *Eur J Clin Microbiol Infect Dis* Off Publ Eur Soc Clin Microbiol. 2020 Jan;39(1):93–101.
6. Erkens C, Tekeli B, van Soelingen D, Schimmel H, Verver S. Recurrent tuberculosis in the Netherlands - a 24-year follow-up study, 1993 to 2016. *Euro Surveill* [Internet]. 2022;27(12). Available from: <http://www.ncbi.nlm.nih.gov/pubmed/35332864>

7. Godfrey-Faussett P, Githui W, Batchelor B, Brindle R, Paul J, Hawken M, et al. Recurrence of HIV-related tuberculosis in an endemic area may be due to relapse or reinfection. *Tuber Lung Dis* [Internet]. 1994 Jun;75(3 PG-199–202):199–202. Available from: NS -
8. Interrante JD, Haddad MB, Kim L, Gandhi NR, JD. I, MB. H, et al. Exogenous Reinfection as a Cause of Late Recurrent Tuberculosis in the United States. *Ann Am Thorac Soc* [Internet]. 2015 Nov;12(11):1619–26. Available from: NS -
9. Isanaka S, Mugusi F, Urassa W, Willett WC, Bosch RJ, Villamor E, et al. Iron deficiency and anemia predict mortality in patients with tuberculosis. *J Nutr* [Internet]. 2012 Feb;142(2):350–7. Available from: NS -
10. Jindani A, Nunn AJ, Enarson DA, A. J, AJ. N, DA. E. Two 8-month regimens of chemotherapy for treatment of newly diagnosed pulmonary tuberculosis: international multicentre randomised trial. *Lancet (London, England)* [Internet]. 2004 Oct;364(9441 PG-1244–51):1244–51. Available from: NS -
11. Kalema N, Lindan C, Glidden D, Yoo SD, Katamba A, Alfred A, et al. Predictors and short-term outcomes of recurrent pulmonary tuberculosis, Uganda: a cohort study. *South African Respir J*. 2017;23(4):106–12.
12. Kim L, Moonan PK, Heilig CM, Yelk Woodruff RS, Kammerer JS, Haddad MB. Factors associated with recurrent tuberculosis more than 12 months after treatment completion. *Int J Tuberc Lung Dis* [Internet]. 2016 Jan;20(1):49–56. Available from: NS -
13. Li M, Qiu Y, Guo M, Zhang S, Wang G, Wang Y, et al. Investigation on the cause of recurrent tuberculosis in a rural area in China using whole-genome sequencing: A retrospective cohort study. *Tuberculosis* [Internet]. 2022 Mar;133:102174. Available from: <https://linkinghub.elsevier.com/retrieve/pii/S1472979222000117>
14. Lin H, Lin Y, Xiao L, Chen Y, Zeng X, Chang C. How Do Smoking Status and Smoking Cessation Efforts Affect TB Recurrence After Successful Completion of Anti-TB Treatment? A Multicenter, Prospective Cohort Study With a 7-Year Follow-up in China. *Nicotine Tob Res* [Internet]. 2021 Nov 5;23(12):1995–2002. Available from: <https://pubmed.ncbi.nlm.nih.gov/34059890/>
15. Lin Y, Lin H, Xiao L, Chen Y, Meng X, Zeng X, et al. Tuberculosis recurrence over a 7-year follow-up period in successfully treated patients in a routine program setting in China: a prospective longitudinal study. *Int J Infect Dis* [Internet]. 2021 Sep;110:403–9. Available from: <https://pubmed.ncbi.nlm.nih.gov/34332089/>
16. Mfinanga SG, Kirenga BJ, Chanda DM, Mutayoba B, Mthiyane T, Yimer G, et al. Early versus delayed initiation of highly active antiretroviral therapy for HIV-positive adults with newly diagnosed pulmonary tuberculosis (TB-HAART): a prospective, international, randomised, placebo-controlled trial. *Lancet Infect Dis* [Internet]. 2014 Jul;14(7):563–71. Available from: <http://www.ncbi.nlm.nih.gov/pubmed/24810491>
17. Millet J-P, Orcau A, Casals M, Garcia de Olalla P, Cayla JA. Recurrences in tuberculosis in a cohort of human immunodeficiency virus-infected patients: the influence of highly active antiretroviral therapy. *Enferm Infecc Microbiol Clin*. 2013 Apr;31(4):227–9.
18. Millet J-P, Orcau A, de Olalla PG, Casals M, Rius C, Cayla JA, et al. Tuberculosis recurrence and its associated risk factors among successfully treated patients. *J Epidemiol Community Health* [Internet]. 2009 Oct;63(10 PG-799–804):799–804. Available from: NS -
19. Millet J-P, Orcau A, Rius C, Casals M, de Olalla PG, Moreno A, et al. Predictors of death among patients who completed tuberculosis treatment: a population-based cohort study. *PLoS One*. 2011;6(9):e25315.
20. Naidoo K, Moodley MC, Hassan-Moosa R, Dookie N, Yende-Zuma N, Perumal R, et al. Recurrent subclinical tuberculosis among ART accessing participants: Incidence, clinical course, and outcomes. *Clin Infect Dis* [Internet]. 2022 Mar 5; Available from: <https://academic.oup.com/cid/advance-article/doi/10.1093/cid/ciac185/6542969>
21. Narita M, Hisada M, Thimmappa B, Stambaugh J, Ibrahim E, Hollender E, et al. Tuberculosis recurrence: multivariate analysis of serum levels of tuberculosis drugs, human immunodeficiency virus status, and other risk factors. *Clin Infect Dis* [Internet]. 2001 Feb;32(3):515–7. Available from: NS -
22. Nicholas S, Sabapathy K, Ferreyra C, Varaine F, Pujades-Rodriguez M, S. N, et al. Incidence of tuberculosis in HIV-infected patients before and after starting combined antiretroviral therapy in 8 sub-Saharan African HIV programs. *J Acquir Immune Defic Syndr* [Internet]. 2011 Aug;57(4 PG-311–8):311–8. Available from: NS -
23. Pascopella L, Deriemer K, Watt JP, Flood JM. When tuberculosis comes back: who develops recurrent tuberculosis in California? *PLoS One*. 2011;6(11):e26541.
24. Picon PD, Rizzon CFC, Bassanesi SL, Silva LCC da, Della Giustina M de L. Retreatment of tuberculosis patients in the city of Porto Alegre, Brazil: outcomes. *J Bras Pneumol* [Internet]. 2011;37(4 PG-504–11):504–11. Available from: NS -
25. Pilheu JA, De Salvo MC, Gnecco V. Relapses in pulmonary tuberculosis. Value of the case history for the selection of the best retreatment regimen. *Medicina (B Aires)* [Internet]. 1982;42(4):389–95. Available from: NS -
26. Schaaf HS, Krook S, Hollemans DW, Warren RM, Donald PR, Hesselning AC, et al. Recurrent culture-confirmed tuberculosis in human immunodeficiency virus-infected children. *Pediatr Infect Dis J* [Internet]. 2005 Aug;24(8):685–91. Available from: NS -
27. Shu C-C, Liao K-M, Chen Y-C, Wang J-J, Ho C-H. The burdens of tuberculosis on patients with malignancy: incidence, mortality and relapse. *Sci Rep*. 2019 Aug;9(1):11901.
28. Unis G, Ribeiro AW, Esteves LS, Spies FS, Picon PD, Dalla Costa ER, et al. Tuberculosis recurrence in a high incidence setting for HIV and tuberculosis in Brazil. *BMC Infect Dis*. 2014 Oct;14:548.
29. Youn HM, Shin M-K, Jeong D, Kim H-J, Choi H, Kang YA. Risk factors associated with tuberculosis recurrence in South Korea determined using a nationwide cohort study. Lim JH, editor. *PLoS One* [Internet]. 2022 Jun 16;17(6):e0268290. Available from: <https://dx.plos.org/10.1371/journal.pone.0268290>
30. Zong Z, Huo F, Shi J, Jing W, Ma Y, Liang Q, et al. Relapse Versus Reinfection of Recurrent Tuberculosis Patients in a National Tuberculosis Specialized Hospital in Beijing, China. *Front Microbiol*. 2018;9:1858.

*Data is incomplete or cannot be extracted reliably*

1. Aziz A, Ishaq M, Jaffer NA, Akhwand R, Bhatti AH. Clinical trial of two short-course (6-month) regimens and a standard regimen (12-month) chemotherapy in retreatment of pulmonary tuberculosis in Pakistan. Results 18 months after completion of treatment (Lahore Tuberculosis Study). *Am Rev Respir Dis*. 1986 Nov;134(5):1056–61.
2. Cacho J, Perez Meixeira A, Cano I, et al. Recurrent tuberculosis from 1992 to 2004 in a metropolitan area. *Eur Respir J* 2007; **30**: 333–7.
3. Chan SL, Wong PC, Tam CM. 4-, 5- and 6-month regimens containing isoniazid, rifampicin, pyrazinamide and streptomycin for treatment of pulmonary tuberculosis under program conditions in Hong Kong. *Tuber Lung Dis* [Internet]. 1994 Aug;75(4):245–50. Available from: NS -

4. Chien JY, Chen YT, Wu SG, Lee JJ, Wang JY, Yu CJ. Treatment outcome of patients with isoniazid mono-resistant tuberculosis. *Clin Microbiol Infect* 2014; **21**: 1–10.
5. Chierakul N, Saengthongpinij V, Foongladda S. Clinical features and outcomes of isoniazid mono-resistant pulmonary tuberculosis. *J Med Assoc Thai* [Internet]. 2014 Mar;97 Suppl 3(PG-S86-90):S86-90. Available from: NS -
6. Driver CR, Munsiff SS, Li J, Kundamal N, Osahan SS. Relapse in Persons Treated for Drug-Susceptible Tuberculosis in a Population with High Coinfection with Human Immunodeficiency Virus in New York City. *Clin Infect Dis* [Internet]. 2001 Nov;33(10):1762–9. Available from: <https://academic.oup.com/cid/article-lookup/doi/10.1086/323784>
7. Elmi OS, Hasan H, Abdullah S, Mat Jeab MZ, Ba Z, Naing NN, et al. Treatment Outcomes of Patients with Multidrug-Resistant Tuberculosis (MDR- TB) Compared with Non-MDR-TB Infections in Peninsular Malaysia. *Malays J Med Sci* [Internet]. 2016 Jul;23(4 PG-17–25):17–25. Available from: NS -
8. Elorriaga Sánchez F, Pérez Salazar G. Modificación al tratamiento corto de la tuberculosis pulmonar TT - Modification for the short treatment of pulmonary tuberculosis. *Rev Fac Med UNAM* [Internet]. 1999;42(3):110–3. Available from: <http://pesquisa.bvsalud.org/portal/resource/es/lil-276484>
9. Kleeberg HH. Pulmonary tuberculosis treated with isoprodian and rifampicin or pyrazinamide. *Chemotherapy* [Internet]. 1987;33(3 PG-219–28):219–28. Available from: NS -
10. Langton ME, Cowie RL, ME. L, RL. C. Failure of a prothionamide-containing oral antituberculosis regimen. *S Afr Med J* [Internet]. 1985 Dec;68(12 PG-881):881. Available from: NS -
11. Lisha P V, James PT, Ravindran C. Morbidity and mortality at five years after initiating Category I treatment among patients with new sputum smear positive pulmonary tuberculosis. *Indian J Tuberc*. 2012 Apr;59(2):83–91.
12. Maghradze N, Jugheli L, Borrell S, Tukvadze N, Aspindzelashvili R, Avaliani Z, et al. Classifying recurrent Mycobacterium tuberculosis cases in Georgia using MIRU-VNTR typing. *PLoS One*. 2019;14(10):e0223610.
13. Mahishale V, Avuthu S, Patil B, Lolly M, Eti A, Khan S, et al. Effect of Poor Glycemic Control in Newly Diagnosed Patients with Smear-Positive Pulmonary Tuberculosis and Type-2 Diabetes Mellitus. *Iran J Med Sci* [Internet]. 2017 Mar;42(2):144–51. Available from: NS -
14. McGregor MM, Olliaro P, Wolmarans L, Mabuza B, Bredell M, Felten MK, et al. Efficacy and safety of rifabutin in the treatment of patients with newly diagnosed pulmonary tuberculosis. *Am J Respir Crit Care Med* [Internet]. 1996 Nov;154(5 PG-1462–7):1462–7. Available from: NS -
15. Mundra A, Deshmukh PR, Dawale A. Magnitude and determinants of adverse treatment outcomes among tuberculosis patients registered under Revised National Tuberculosis Control Program in a Tuberculosis Unit, Wardha, Central India: A record-based cohort study. *J Epidemiol Glob Health* [Internet]. 2017 Jun;7(2):111–8. Available from: NS -
16. Pasipanodya JG, Smythe W, Merle CS, Olliaro PL, Deshpande D, Magombedze G, et al. Artificial intelligence-derived 3-Way Concentration-dependent Antagonism of Gatifloxacin, Pyrazinamide, and Rifampicin During Treatment of Pulmonary Tuberculosis. *Clin Infect Dis*. 2018 Nov;67(suppl\_3):S284–92.
17. Santha T, Nazareth O, Krishnamurthy MS, Balasubramanian R, Vijayan VK, Janardhanam B, et al. Treatment of pulmonary tuberculosis with short course chemotherapy in South India-5-year follow up. *Tubercle* [Internet]. 1989 Dec;70(4):229–34. Available from: NS -
18. Sbarbaro JA, Catlin BJ, Iseman M. Long-term effectiveness of intermittent therapy for tuberculosis: final report of three Denver studies. *Am Rev Respir Dis* [Internet]. 1980 Jan;121(1):172–4. Available from: NS -
19. Schechter MC, Bizune D, Kagei M, Machaidze M, Holland DP, Oladele A, et al. Time to Sputum Culture Conversion and Treatment Outcomes Among Patients with Isoniazid-Resistant Tuberculosis in Atlanta, Georgia. *Clin Infect Dis* [Internet]. 2017 Nov;65(11 PG-1862–1871):1862–71. Available from: NS -
20. Shennan DH, DH. S. Comparison of a conventional and an initial 2-month intensive drug regimen for treating pulmonary tuberculosis in Swaziland. *Tubercle* [Internet]. 1984 Jun;65(2 PG-101–4):101–4. Available from: NS -
21. Shennan DH, Maarsingh H, Davenport B. Attacks and relapses of sputum-smear-positive tuberculosis over seven years at three Transkei hospitals. *Cent Afr J Med* [Internet]. 1986 Nov;32(11):259–62. Available from: NS -
22. Silva VD da, Mello FC de Q, Figueiredo SC de A, da Silva VD, Mello FC de Q, Figueiredo SC de A. Estimated rates of recurrence, cure, and treatment abandonment in patients with pulmonary tuberculosis treated with a -four-drug fixed-dose combination regimen at a tertiary health care facility in the city of Rio de Janeiro, Brazil. *J Bras Pneumol*. 2017;43(2):113–20.
23. Suo J, Yu MC, Lee CN, Chiang CY, Lin TP, J. S, et al. Treatment of multidrug-resistant tuberculosis in Taiwan. *Chemotherapy* [Internet]. 1996;42 Suppl 3(PG-20-3; discussion 30-3):20–3; discussion 30. Available from: NS -
24. Villegas L, Otero L, Sterling TR, Huaman MA, Van der Stuyft P, Gotuzzo E, et al. Prevalence, Risk Factors, and Treatment Outcomes of Isoniazid- and Rifampicin-Mono-Resistant Pulmonary Tuberculosis in Lima, Peru. *PLoS One* [Internet]. 2016;11(4 PG-e0152933):e0152933. Available from: NS -

Recurrences and failures cannot be distinguished

1. Algerian working group/British medical research council cooperative, study. Short-course chemotherapy for pulmonary tuberculosis under routine programme conditions: a comparison of regimens of 28 and 36 weeks duration in Algeria. *Tubercle*. 1991 Jun;72(2):88–100.
2. Arriaga MB, Araújo-Pereira M, Barreto-Duarte B, Nogueira B, Freire MVCNS, Queiroz ATL, et al. The Effect of Diabetes and Prediabetes on Antituberculosis Treatment Outcomes: A Multicenter Prospective Cohort Study. *J Infect Dis* [Internet]. 2021 Oct 15; Available from: <https://academic.oup.com/jid/advance-article/doi/10.1093/infdis/jiab427/6398049>
3. Benator D, Bhattacharya M, Bozeman L, Burman W, Catanzaro A, Chaisson R, et al. Rifapentine and isoniazid once a week versus rifampicin and isoniazid twice a week for treatment of drug-susceptible pulmonary tuberculosis in HIV-negative patients: A randomised clinical trial. *Lancet* [Internet]. 2002 Aug;360(9332):528–34. Available from: NS -
4. Bryant JM, Harris SR, Parkhill J, Dawson R, Diacon AH, van Helden P, et al. Whole-genome sequencing to establish relapse or re-infection with Mycobacterium tuberculosis: a retrospective observational study. *Lancet Respir Med* [Internet]. 2013 Dec;1(10):786–92. Available from: <http://www.ncbi.nlm.nih.gov/pubmed/24461758>
5. Dheda K, Limberis JD, Pietersen E, Phelan J, Esmail A, Lesosky M, et al. Outcomes, infectiousness, and transmission dynamics of patients with extensively drug-resistant tuberculosis and home-discharged patients with programmatically incurable tuberculosis: a prospective cohort study. *Lancet Respir Med* [Internet]. 2017 Apr;5(4):269–81. Available from: <http://www.ncbi.nlm.nih.gov/pubmed/28109869>
6. Fox GJ, Benedetti A, Cox H, Koh W-J, Viiklepp P, Ahuja S, et al. Group 5 drugs for multidrug-resistant tuberculosis: individual patient data meta-analysis. *Eur Respir J* [Internet]. 2017 Jan;49(1). Available from: NS -



7. Kim HW, Shin AY, Ha JH, Ahn JH, Kang HS, Kim JS. Effect of serum isoniazid level on treatment outcomes among tuberculosis patients with slow response – A retrospective cohort study. *J Infect Chemother* [Internet]. 2021 Nov;27(11):1555–61. Available from: <https://pubmed.ncbi.nlm.nih.gov/34238662/>
8. Nunn AJ, Cook S V, Burgos M, Rigouts L, Yorke-Edwards V, Anyo G, et al. Results at 30 months of a randomised trial of FDCs and separate drugs for the treatment of tuberculosis. *Int J Tuberc Lung Dis* [Internet]. 2014 Oct;18(10 PG-1252–4):1252–4. Available from: NS -
9. Ormerod LP, McCarthy OR, Rudd RM, Horsfield N, LP. O, OR. M, et al. Short course chemotherapy for pulmonary tuberculosis. *Respir Med* [Internet]. 1991 Jul;85(4 PG-291–4):291–4. Available from: NS -
10. Pettit AC, Jenkins CA, Blevins Peratikos M, Yotebieng M, Diero L, Do CD, et al. Directly observed therapy and risk of unfavourable tuberculosis treatment outcomes among an international cohort of people living with HIV in low- and middle-income countries. *J Int AIDS Soc*. 2019 Dec;22(12):e25423.
11. Sterling TR, Zhao Z, Khan A, Chaisson RE, Schluger N, Mangura B, et al. Mortality in a large tuberculosis treatment trial: modifiable and non-modifiable risk factors. *Int J Tuberc Lung Dis* [Internet]. 2006 May;10(5):542–9. Available from: NS -
12. Witney AA, Bateson ALE, Jindani A, Phillips PPJ, Coleman D, Stoker NG, et al. Use of whole-genome sequencing to distinguish relapse from reinfection in a completed tuberculosis clinical trial. *BMC Med* [Internet]. 2017 Mar 29;15(1):71. Available from: NS

Sub studies of larger studies already included

1. A controlled trial of six months chemotherapy in pulmonary tuberculosis. First Report: results during chemotherapy. British Thoracic Association. *Br J Dis Chest*. 1981 Apr;75(2):141–53.
2. Anaam MS, Ibrahim MIM, Al Serouri AW, Bassili A, Aldobhani A. A nested case-control study on relapse predictors among tuberculosis patients treated in Yemen's NTCP. *Public Health Action* 2012; 2: 168–73.
3. Baez-Saldana R, Delgado-Sanchez G, Garcia-Garcia L, Cruz-Hervert LP, Montesinos-Castillo M, Ferreyra-Reyes L, et al. Isoniazid Mono-Resistant Tuberculosis: Impact on Treatment Outcome and Survival of Pulmonary Tuberculosis Patients in Southern Mexico 1995-2010. *PLoS One* [Internet]. 2016;11(12 PG-e0168955):e0168955. Available from: NS -
4. Clinical trial of three 6-month regimens of chemotherapy given intermittently in the continuation phase in the treatment of pulmonary tuberculosis. Singapore Tuberculosis Service/British Medical Research Council. *Am Rev Respir Dis*. 1985 Aug;132(2):374–8.
5. Dippenaar A, De Vos M, Marx FM, Adroub SA, van Helden PD, Pain A, et al. Whole genome sequencing provides additional insights into recurrent tuberculosis classified as endogenous reactivation by IS6110 DNA fingerprinting. *Infect Genet Evol*. 2019 Jul;75:103948.
6. East African/British Medical Research Councils. Controlled clinical trial of 4 short-course regimens of chemotherapy (three 6-month and one 8-month) for pulmonary tuberculosis. *Tubercle* [Internet]. 1983 Sep;64(3):153–66. Available from: <http://www.ncbi.nlm.nih.gov/pubmed/6356538>
7. Hamilton CD, Stout JE, Goodman PC, Mosher A, Menzies R, Schluger NW, et al. The value of end-of-treatment chest radiograph in predicting pulmonary tuberculosis relapse. *Int J Tuberc Lung Dis* [Internet]. 2008 Sep;12(9):1059–64. Available from: NS -
8. Hang NT Le, Matsushita I, Shimbo T, Hong LT, Tam DB, Lien LT, et al. Association between tuberculosis recurrence and interferon- $\gamma$  response during treatment. *J Infect* [Internet]. 2014 Dec;69(6):616–26. Available from: NS -
9. HONG KONG CHEST SERVICE/BRITISH MEDICAL RESEARCH COUNCIL. Controlled Trial of Four Thrice-Weekly Regimens and a Daily Regimen All Given for 6 Months for Pulmonary Tuberculosis. *Lancet*. 1981 Jan;317(8213):171–4.
10. Huyen MNT, Cobelens FGJ, Buu TN, Lan NTN, Dung NH, Kremer K, et al. Epidemiology of isoniazid resistance mutations and their effect on tuberculosis treatment outcomes. *Antimicrob Agents Chemother* [Internet]. 2013 Aug;57(8 PG-3620–7):3620–7. Available from: NS -
11. Johnson JL, Okwera A, Vjecha MJ, Byekwaso F, Nakibali J, Nyole S, et al. Risk factors for relapse in human immunodeficiency virus type 1 infected adults with pulmonary tuberculosis. *Int J Tuberc Lung Dis* [Internet]. 1997 Oct;1(5 PG-446–53):446–53. Available from: NS -
12. Khan A, Sterling TR, Reves R, Vernon A, Horsburgh CR, A. K, et al. Lack of weight gain and relapse risk in a large tuberculosis treatment trial. *Am J Respir Crit Care Med* [Internet]. 2006 Aug;174(3 PG-344–8):344–8. Available from: NS -
13. Lopez-Cortes LFE, Marin-Niebla A, Lopez-Cortes LFE, Villanago I, Rodriguez-Diez M, Pascual-Carrasco R. Influence of treatment and immunological recovery on tuberculosis relapses in HIV-infected patients. *Int J Tuberc Lung Dis* [Internet]. 2005 Dec;9(12 PG-1385–90):1385–90. Available from: NS -
14. Ramachandran G, Chandrasekaran P, Gaikwad S, Agibothu Kupparam HK, Thiruvengadam K, Gupte N, et al. Subtherapeutic Rifampicin Concentration Is Associated With Unfavorable Tuberculosis Treatment Outcomes. *Clin Infect Dis an Off Publ Infect Dis Soc Am*. 2020 Mar;70(7):1463–70.
15. Vernon A, Burman W, Benator D, Khan A, Bozeman L. Acquired rifamycin monoresistance in patients with HIV-related tuberculosis treated with once-weekly rifapentine and isoniazid. Tuberculosis Trials Consortium. *Lancet* (London, England) [Internet]. 1999 May;353(9167 PG-1843–7):1843–7. Available from: NS -
16. Wang J-YJ-TJ-YJ-T, Sun H-Y, Wang J-YJ-TJ-YJ-T, Hung C-C, Yu M-C, Lee C-H, et al. Nine- to Twelve-Month Anti-Tuberculosis Treatment Is Associated with a Lower Recurrence Rate than 6-9-Month Treatment in Human Immunodeficiency Virus-Infected Patients: A Retrospective Population-Based Cohort Study in Taiwan. *PLoS One* [Internet]. 2015;10(12):e0144136. Available from: NS -
17. Zierski M, Bek E, Long MW, Snider Jr. DE. Short-course (6 month) cooperative tuberculosis study in Poland: results 18 months after completion of treatment. *Am Rev Respir Dis* [Internet]. 1980 Dec;122(6):879–89. Available from: NS -

*Reinfections and relapses are distinguished based on cluster identification*

1. de Boer AS, Borgdorff MW, Vynnycky E, Sebek MM, van Soolingen D, AS. de B, et al. Exogenous re-infection as a cause of recurrent tuberculosis in a low-incidence area. *Int J Tuberc Lung Dis* [Internet]. 2003 Feb;7(2 PG-145–52):145–52. Available from: NS -

2. Heldal E, Docker H, Caugant DA, Tverdal A, E. H, H. D, et al. Pulmonary tuberculosis in Norwegian patients. The role of reactivation, re-infection and primary infection assessed by previous mass screening data and restriction fragment length polymorphism analysis. *Int J Tuberc Lung Dis* [Internet]. 2000 Apr;4(4):300–7. Available from: NS -
3. Iñigo Martínez J, Arce Arnáez A, Chaves Sánchez F, Palenque Mataix E, Burgoa Arenales M. Patrones de transmisión de la tuberculosis en un área sanitaria de Madrid TT - Patterns of Tuberculosis Transmission in a Health Area in Madrid, Spain. *Rev Esp Salud Publica* [Internet]. 2003;77(5):541–51. Available from: [http://www.scielo.org/scielo.php?script=sci\\_arttext&pid=S1135-57272003000500004&lang=pt](http://www.scielo.org/scielo.php?script=sci_arttext&pid=S1135-57272003000500004&lang=pt)

*Systematic review*

1. Ayles H, Muyoyeta M, H. A, M. M. Isoniazid to prevent first and recurrent episodes of TB. *Trop Doct* [Internet]. 2006 Apr;36(2 PG-83–6):83–6. Available from: NS -
2. Azhar GS, GS. A. DOTS for TB relapse in India: A systematic review. *Lung India* [Internet]. 2012 Apr;29(2 PG-147–53):147–53. Available from: NS -
3. Baker MA, Harries AD, Jeon CY, Hart JE, Kapur A, Lönnroth K, et al. The impact of diabetes on tuberculosis treatment outcomes: A systematic review. 2011.
4. Bruins WS, van Leth F, WS. B, F. van L. Effect of secondary preventive therapy on recurrence of tuberculosis in HIV-infected individuals: a systematic review. *Infect Dis (London, England)* [Internet]. 2017 Mar;49(3):161–9. Available from: NS -
5. Chang KC, Leung CC, Yew WW, Chan SL, Tam CM, KC. C, et al. Dosing schedules of 6-month regimens and relapse for pulmonary tuberculosis. *Am J Respir Crit Care Med* [Internet]. 2006 Nov;174(10):1153–8. Available from: NS -
6. Cox HS, Morrow M, Deutschmann PW. Long term efficacy of DOTS regimens for tuberculosis: systematic review. *BMJ* [Internet]. 2008 Mar;336(7642 PG-484–7):484–7. Available from: NS -
7. El-Sadr WM, Perlman DC, Denning E, Matts JP, Cohn DL. A Review of Efficacy Studies of 6-Month Short-Course Therapy for Tuberculosis among Patients Infected with Human Immunodeficiency Virus: Differences in Study Outcomes. *Clin Infect Dis* [Internet]. 2001 Feb;32(4):623–32. Available from: <https://academic.oup.com/cid/article-lookup/doi/10.1086/318706>
8. Falzon D, Gandhi N, Migliori GB, Sotgiu G, Cox HS, Holtz TH, et al. Resistance to fluoroquinolones and second-line injectable drugs: impact on multidrug-resistant TB outcomes. *Eur Respir J* [Internet]. 2013 Jul;42(1 PG-156–68):156–68. Available from: NS -
9. Fregonese F, Ahuja SD, Akkerman OW, Arakaki-Sanchez D, Ayakaka I, Baghaei P, et al. Comparison of different treatments for isoniazid-resistant tuberculosis: an individual patient data meta-analysis. *Lancet Respir Med*. 2018 Apr;6(4):265–75.
10. Gallardo CR, Rigau Comas D, Valderrama Rodríguez A, Roque i Figuls M, Parker LA, Cayla J, et al. Fixed-dose combinations of drugs versus single-drug formulations for treating pulmonary tuberculosis. *Cochrane database Syst Rev* [Internet]. 2016 May;(5):CD009913. Available from: NS -
11. Gegia M, Winters N, Benedetti A, van Sooling D, Menzies D, M. G, et al. Treatment of isoniazid-resistant tuberculosis with first-line drugs: a systematic review and meta-analysis. *Lancet Infect Dis* [Internet]. 2017 Feb;17(2 PG-223–234):223–34. Available from: NS -
12. Gelband H. Regimens of less than six months for treating tuberculosis. *Cochrane Database Syst Rev* [Internet]. 1999;(2 PG-CD001362):CD001362. Available from: <http://doi.wiley.com/10.1002/14651858.CD001362>
13. Jeyashree K, Kathirvel S, Shewade HD, Kaur H, Goel S, K. J, et al. Smoking cessation interventions for pulmonary tuberculosis treatment outcomes. *Cochrane database Syst Rev* [Internet]. 2016 Jan;(1):CD011125. Available from: NS -
14. Johnston JC, Campbell JR, Menzies D, JC. J, JR. C, D. M. Effect of Intermittency on Treatment Outcomes in Pulmonary Tuberculosis: An Updated Systematic Review and Metaanalysis. *Clin Infect Dis* [Internet]. 2017 May;64(9):1211–20. Available from: NS -
15. Korenromp EL, Scano F, Williams BG, Dye C, Nunn P, EL. K, et al. Effects of human immunodeficiency virus infection on recurrence of tuberculosis after rifampin-based treatment: an analytical review. *Clin Infect Dis* [Internet]. 2003 Jul;37(1 PG-101–12):101–12. Available from: NS -
16. Lambert M-L, Hasker E, Van Deun A, Roberfroid D, Boelaert M, Van der Stuyft P. Recurrence in tuberculosis: relapse or reinfection? *Lancet Infect Dis*. 2003 May;3(5):282–7.
17. Le HQ, Davidson PT. Reactivation and exogenous reinfection: their relative roles in the pathogenesis of tuberculosis. *Curr Clin Top Infect Dis* [Internet]. 1996;16(PG-260-76):260–76. Available from: <http://www.ncbi.nlm.nih.gov/pubmed/8714258>
18. Lee HW, Lee JK, Kim E, Yim J-J, Lee C-H, HW. L, et al. The Effectiveness and Safety of Fluoroquinolone-Containing Regimen as a First-Line Treatment for Drug-Sensitive Pulmonary Tuberculosis: A Systematic Review and Meta-Analysis. *PLoS One* [Internet]. 2016;11(7 PG-e0159827):e0159827. Available from: NS -
19. Lew W, Pai M, Oxlade O, Martin D, Menzies D, W. L, et al. Initial drug resistance and tuberculosis treatment outcomes: systematic review and meta-analysis. *Ann Intern Med* [Internet]. 2008 Jul;149(2):123–34. Available from: NS -
20. Menzies D, Benedetti A, Paydar A, Royce S, Madhukar P, Burman W, et al. Standardized treatment of active tuberculosis in patients with previous treatment and/or with mono-resistance to isoniazid: a systematic review and meta-analysis. *PLoS Med* [Internet]. 2009 Sep;6(9 PG-e1000150):e1000150. Available from: NS -
21. Moodley Y, Govender K, Y. M, K. G. A systematic review of published literature describing factors associated with tuberculosis recurrence in people living with HIV in Africa. *Afr Health Sci* [Internet]. 2015 Dec;15(4 PG-1239–46):1239–46. Available from: NS -
22. Panjabi R, Comstock GW, Golub JE, R. P, GW. C, JE. G, et al. Recurrent tuberculosis and its risk factors: adequately treated patients are still at high risk. *Int J Tuberc Lung Dis*. 2007 Aug;11(8):828–37.
23. Pasipanodya JG, McIlleron H, Burger A, Wash PA, Smith P, Gumbo T. Serum drug concentrations predictive of pulmonary tuberculosis outcomes. *J Infect Dis*. 2013 Nov;208(9):1464–73.
24. Phillips PPJ, Nunn AJ, Paton NI. Is a 4-month regimen adequate to cure patients with non-cavitary tuberculosis and negative cultures at 2 months? *Int J Tuberc Lung Dis* [Internet]. 2013 Jun;17(6):807–9. Available from: NS -
25. Ruan Q, Liu Q, Sun F, Shao L, Jin J, Yu S, et al. Moxifloxacin and gatifloxacin for initial therapy of tuberculosis: a meta-analysis of randomized clinical trials. *Emerg Microbes Infect* [Internet]. 2016 Feb;5(PG-e12):e12. Available from: NS -
26. Wang J-Y, Lee L-N, Lai H-C, Hsu H-L, Liaw Y-S, Hsueh P-R, et al. Prediction of the tuberculosis reinfection proportion from the local incidence. *J Infect Dis* [Internet]. 2007 Jul;196(2):281–8. Available from: NS -

27. Weiangkham D, Umnuaypornlert A, Saokaew S, Prommongkol S, Ponmark J. Effect of alcohol consumption on relapse outcomes among tuberculosis patients: A systematic review and meta-analysis. *Front public Heal* [Internet]. 2022;10:962809. Available from: <http://www.ncbi.nlm.nih.gov/pubmed/36408038>
28. Xu H-B, Jiang R-H, Li L. Pulmonary resection for patients with multidrug-resistant tuberculosis: systematic review and meta-analysis. *J Antimicrob Chemother* [Internet]. 2011 Aug;66(8 PG-1687-95):1687-95. Available from: NS -
29. Xu P, Chen H, Xu J, Wu M, Zhu X, Wang F, et al. Moxifloxacin is an effective and safe candidate agent for tuberculosis treatment: a meta-analysis. *Int J Infect Dis* [Internet]. 2017 Jul;60(PG-35-41):35-41. Available from: <http://www.ncbi.nlm.nih.gov/pubmed/28495364>

*Definition of recurrent TB does not match WHO definition*

1. Bestrashniy JRBM, Nguyen VN, Nguyen TL, Pham TL, Nguyen TA, Pham DC, et al. Recurrence of tuberculosis among patients following treatment completion in eight provinces of Vietnam: A nested case-control study. *Int J Infect Dis*. 2018 Sep;74:31-7.
2. Bizune DJ, Kempker RR, Kagei M, Yamin A, Mohamed O, Holland DP, et al. Treatment Complexities Among Patients with Tuberculosis in a High HIV Prevalence Cohort in the United States. *AIDS Res Hum Retroviruses*. 2018 Sep;
3. Favez G, Leuenberger P. A controlled trial of individually-adapted short-course chemotherapy versus two-year scheme in original treatment of pulmonary tuberculosis. Report after a five-year follow-up. *Chest* [Internet]. 1982 Oct;82(4):426-9. Available from: NS -
4. Lago PM, Boechat N, Migueis DP, Almeida AS, Lazzarini LC, Saldanha MM, et al. Interleukin-10 and interferon-gamma patterns during tuberculosis treatment: possible association with recurrence. *Int J Tuberc Lung Dis* [Internet]. 2012 May;16(5 PG-656-9):656-9. Available from: NS -
5. Allwood BW, van der Zalm MM, Amaral AFS, Byrne A, Datta S, Egere U, et al. Post-tuberculosis lung health: perspectives from the First International Symposium. *Int J Tuberc Lung Dis Off J Int Union against Tuberc Lung Dis*. 2020 Aug;24(8):820-8.
6. Córdoba C, Buritica PA, Pacheco R, Mancilla A, Valderrama-Aguirre A, Bergonzoli G. Risk factors associated with pulmonary tuberculosis relapses in Cali, Colombia. *Biomedica*. 2020 May;40(Supl. 1):102-12.
7. Dedefo MG, Sirata MT, Ejeta BM, Wakjira GB, Fekadu G, Labata BG. Treatment Outcomes of Tuberculosis Retreatment Case and Its Determinants in West Ethiopia. *Open Respir Med J*. 2019;13:58-64.
8. Jo Y, Mirzoeva F, Chry M, Qin ZZ, Codlin A, Bobokhojaev O, et al. Standardized framework for evaluating costs of active case-finding programs: An analysis of two programs in Cambodia and Tajikistan. *PLoS One*. 2020;15(1):e0228216.
9. Kouemo Motse FD, Nsagha DS, Adiogo D, Kojom Foko LP, Kedy Koum DC, Ngaba GP, et al. Rifampicin resistance among Mycobacterium tuberculosis-infected individuals using GeneXpert MTB/RIF ultra: a hospital-based study. *Trop Med Int Health*. 2020 Sep;
10. Kumar NP, Moideen K, Nancy A, Viswanathan V, Thiruvengadam K, Nair D, et al. Plasma chemokines are baseline predictors of unfavorable treatment outcomes in pulmonary tuberculosis. *Clin Infect Dis an Off Publ Infect Dis Soc Am*. 2020 Aug;
11. Marx FM, Cohen T, Menzies NA, Salomon JA, Theron G, Yaesoubi R. Cost-effectiveness of post-treatment follow-up examinations and secondary prevention of tuberculosis in a high-incidence setting: a model-based analysis. *Lancet Glob Heal*. 2020 Sep;8(9):e1223-33.
12. Xie Z, Wang T, Chen H, Wang D, Gao X, Hui Y. Factors associated with diagnostic delay in recurrent TB. *BMC Public Health*. 2020 Aug;20(1):1207.
13. Arozal W, Diliiana, Wikanendra GB, Purwastyastuti, Rusli A. Clinical characteristics of recurrent tuberculosis patients from a Jakarta hospital-based survey. *J Pak Med Assoc* [Internet]. 2021 Feb;71(Suppl 2(2)):S58-61. Available from: <https://pubmed.ncbi.nlm.nih.gov/33785943/>

*Inadequate definition of control group*

1. du Cros P, A K, Z T, T A, J G, G C, et al. Outcomes with a shorter multidrug-resistant tuberculosis regimen from Karakalpakstan, Uzbekistan. *ERJ open Res* [Internet]. 2021;7(1). Available from: <https://pubmed.ncbi.nlm.nih.gov/33585652/>
2. He C, Cheng X, Kaisaier A, Wan J, Luo S, Ren J, et al. Effects of Mycobacterium tuberculosis lineages and regions of difference (RD) virulence gene variation on tuberculosis recurrence. *Ann Transl Med* [Internet]. 2022 Jan;10(2):49-49. Available from: <https://atm.amegroups.com/article/view/87980/html>
3. Liu S, Liu N, Wang H, Zhang X, Yao Y, Zhang S, et al. CCR5 Promoter Polymorphisms Associated With Pulmonary Tuberculosis in a Chinese Han Population. *Front Immunol* [Internet]. 2021 Feb 19;11:544548. Available from: <https://pubmed.ncbi.nlm.nih.gov/33679683/>
4. Liu Y, Zhang XX, Yu JJ, et al. Tuberculosis relapse is more common than reinfection in Beijing, China. *Infect Dis (London, England)* 2020;:1-8. doi:10.1080/23744235.2020.1794027
5. Mujtaba MA, Richardson M, Shahzad H, Javed MI, Raja GK, Shaiq PA, et al. Demographic and Clinical Determinants of Tuberculosis and TB Recurrence: A Double-Edged Retrospective Study from Pakistan. *J Trop Med* [Internet]. 2022;2022:4408306. Available from: <http://www.ncbi.nlm.nih.gov/pubmed/36478977>
6. Nagu TJ, Mboka MA, Nkrumbih ZF, Shayo G, Mizinduko MM, Komba E V., et al. Clinical and Imaging Features of Adults with Recurrent Pulmonary Tuberculosis - A Prospective Case-Controlled Study. *Int J Infect Dis* [Internet]. 2021 Dec;113:S33-9. Available from: <https://pubmed.ncbi.nlm.nih.gov/33716197/>
7. Silva TC, Matsuoka P da FS, Aquino DMC de, Caldas A de JM. Factors associated with tuberculosis retreatment in priority districts of Maranhao, Brazil. *Cien Saude Colet*. 2017 Dec;22(12):4095-104.
8. Wang H-R, Han C, Wang J-L, Zhang Y-A, Wang M-S. Risk Factor for Retreatment Episode on Admission Among TB Patients With Schizophrenia. *Front psychiatry*. 2021;12:793470.

Do not assess risk factors

1. Alao MA, Maroushek SR, Chan YH, Asinobi AO, Slusher TM, Gbadero DA. Treatment outcomes of Nigerian patients with tuberculosis: A retrospective 25-year review in a regional medical center. Wingfield TE, editor. *PLoS One* [Internet]. 2020 Oct 29;15(10):e0239225. Available from: <https://pubmed.ncbi.nlm.nih.gov/33119601/>
2. Anh LTN, M V Kumar A, Ramaswamy G, et al. High Levels of Treatment Success and Zero Relapse in Multidrug-Resistant Tuberculosis Patients Receiving a Levofloxacin-Based Shorter Treatment Regimen in Vietnam. *Trop Med Infect Dis* 2020;5. doi:10.3390/tropicalmed5010043
3. Auchynka V, Kumar AMV, Hurevich H, Sereda Y, Solodovnikova V, Katovich D, et al. Effectiveness and cardiovascular safety of delamanid-containing regimens in adults with multidrug-resistant or extensively drug-resistant tuberculosis: A nationwide cohort study from Belarus, 2016-18. *Monaldi Arch Chest Dis* [Internet]. 2021 Jan 14;91(1). Available from: <https://pubmed.ncbi.nlm.nih.gov/33470081/>
4. Aung KJM, Declercq E, Ali MA, et al. Extension of the intensive phase reduces relapse but not failure in a regimen with rifampicin throughout. *Int J Tuberc Lung Dis* 2012; **16**: 455–61.
5. Aung KJM, Van Deun A, Declercq E, et al. Successful '9-month Bangladesh regimen' for multidrug-resistant tuberculosis among over 500 consecutive patients. *Int J Tuberc Lung Dis* 2014; **18**: 1180–7.
6. Babu Swai O, Aluoch JA, Githui WA, et al. Controlled clinical trial of a regimen of two durations for the treatment of isoniazid resistant pulmonary tuberculosis. *Tubercle* 1988; **69**:5–14. doi:10.1016/0041-3879(88)90035-9
7. Banda H, Kang'ombe C, Harries AD, et al. Mortality rates and recurrent rates of tuberculosis in patients with smear-negative pulmonary tuberculosis and tuberculous pleural effusion who have completed treatment. *Int J Tuberc Lung Dis* 2000; **4**: 968–74.
8. Bandera A, Gori A, Catozzi L, et al. Molecular epidemiology study of exogenous reinfection in an area with a low incidence of tuberculosis. *J Clin Microbiol* 2001; **39**: 2213–8.
9. Banu Rekha V V, Rajaram K, Kripasankar AS, et al. Efficacy of the 6-month thrice-weekly regimen in the treatment of new sputum smear-positive pulmonary tuberculosis under clinical trial conditions. *Natl Med J India* 2012; **25**:196–200.NS -
10. Becerra MC, Appleton SC, Franke MF, et al. Recurrence after treatment for pulmonary multidrug-resistant tuberculosis. *Clin Infect Dis* 2010; **51**: 709–11.
11. Bechan S, Connolly C, Short GM, et al. Directly observed therapy in urban South Africa for tuberculosis given twice weekly in the workplace. *Trans R Soc Trop Med Hyg* 1997; **91**:704–7.NS -
12. Bhatt AN, Tharyan P, Michael JS, et al. Treatment outcomes with daily self-administered treatment and thrice-weekly directly-observed treatment in two cohorts of newly-diagnosed, sputum-positive adults with pulmonary tuberculosis. *Indian J Tuberc* 2020; **67**:105–11. doi:10.1016/j.ijtb.2017.05.012
13. Caminero JA, Pena MJ, Campos-Herrero MI, et al. Exogenous reinfection with tuberculosis on a European island with a moderate incidence of disease. *Am J Respir Crit Care Med* 2001; **163**: 717–20.
14. Cao JP, Zhang LY, Zhu JQ, Chin DP. Two-year follow-up of directly-observed intermittent regimens for smear-positive pulmonary tuberculosis in China. *Int J Tuberc Lung Dis* 1998; **2**: 36-4
15. Chiang C-Y, Enarson DA, Yu M-C, et al. Outcome of pulmonary multidrug-resistant tuberculosis: a 6-yr follow-up study. *Eur Respir J* 2006; **28**: 980–5.
16. Choi H, Lee M, Chen RY, et al. Predictors of pulmonary tuberculosis treatment outcomes in South Korea: a prospective cohort study, 2005-2012. *BMC Infect Dis* 2014; **14**: 360.
17. Ciza F, Gils T, Sawadogo M, et al. Course of Adverse Events during Short Treatment Regimen in Patients with Rifampicin-Resistant Tuberculosis in Burundi. *J Clin Med* 2020; **9**. doi:10.3390/jcm9061873
18. Cohn DL, Catlin BJ, Peterson KL, Judson FN, Sbarbaro JA. A 62-Dose , 6-Month Therapy for Pulmonary and Extrapulmonary Tuberculosis. *Ann Inter Med* 1990; **112**: 407–15.
19. Conradie F, Diacon AH, Ngubane N, et al. Treatment of Highly Drug-Resistant Pulmonary Tuberculosis. *N Engl J Med* 2020; **382**:893–902. doi:10.1056/NEJMoal901814
20. Cowie RL, Langton ME, Becklake MR. Pulmonary tuberculosis in South African gold miners. *Am Rev Respir Dis* 1989; **139**: 1086–9.
21. Da S, Ghan SL, Allen BW, Mitchison DA. Application of DNA fingerprinting with IS986 to sequential mycobacterial isolates obtained from pulmonary tuberculosis patients in Hong Kong before , during and after short-course chemotherapy. 1993; **74**: 47-51
22. Dale KD, Globan M, Tay EL, Trauer JM, Trevan PG, Denholm JT. Recurrence of tuberculosis in a low-incidence setting without directly observed treatment: Victoria, Australia, 2002-2014. *Int J Tuberc Lung Dis* 2017; **21**: 550–5.
23. Das S, Paramasivan CN, Lowrie DB, et al. IS6110 restriction fragment length polymorphism typing of clinical isolates of Mycobacterium tuberculosis from patients with pulmonary tuberculosis in Madras, south India. *Tuber Lung Dis* 1995; **76**: 550–4.
24. Decroo T, Maug AKJ, Hossain MA, et al. Injectables' key role in rifampicin-resistant tuberculosis shorter treatment regimen outcomes. *PLoS One* 2020; **15**:e0238016. doi:10.1371/journal.pone.0238016
25. Dembelu M, Woseneleh T. Prevalence of and Factors Associated with Reoccurrence of Opportunistic Infections Among Adult HIV/AIDS Patients Attending the ART Clinic at Public Health Facilities in Arba Minch Town, Southern Ethiopia. *HIV/AIDS - Res Palliat Care* [Internet]. 2021 Sep; Volume 13:867–76. Available from: <https://pubmed.ncbi.nlm.nih.gov/34512035/>
26. Dippenaar A, De Vos M, Marx FM, et al. Whole genome sequencing provides additional insights into recurrent tuberculosis classified as endogenous reactivation by IS6110 DNA fingerprinting. *Infect Genet Evol* 2019; **75**:103948. doi:10.1016/j.meegid.2019.103948
27. Du J, Li Q, Liu M, Wang Y, Xue Z, Huo F, et al. Distinguishing Relapse From Reinfection With Whole-Genome Sequencing in Recurrent Pulmonary Tuberculosis: A Retrospective Cohort Study in Beijing, China. *Front Microbiol*. 2021; **12**:754352.
28. Dutt A, Stead WW. Short-Course Chemotherapy for Tuberculosis with Mainly Twice-Weekly Isoniazid and Rifampin Community Physicians' Seven-Year Experience with Mainly Outpatients. *Am J Med* 1984; **77**: 233-43
29. Dutt AK, Moers D, Stead WW. Smear-negative, culture-positive pulmonary tuberculosis. Six-month chemotherapy with isoniazid and rifampin. *Am Rev Respir Dis* 1990; **141**:1232–5.
30. Edwards BD, Edwards J, Cooper R, Kunimoto D, Somayaji R, Fisher D. Rifampin-resistant/multidrug-resistant Tuberculosis in Alberta, Canada: Epidemiology and treatment outcomes in a low-incidence setting. Gao L, editor. *PLoS One* [Internet]. 2021 Feb 16;16(2):e0246993. Available from: <https://pubmed.ncbi.nlm.nih.gov/33592031/>

31. el-Sadr WM, Perlman DC, Matts JP, *et al.* Evaluation of an Intensive Intermittent-Induction Regimen and Duration of Short-Course Treatment for Human Immunodeficiency Virus – Related Pulmonary Tuberculosis. ry Beirn Community Programs for Clinical Research on AIDS (CPCRA) and the AIDS Clinical Trials Group (ACTG). *Clin Infect Dis* 1998; **26**: 1148–58.
32. Escudero E, Peña JM, Vázquez JJ, Ortega A. Multidrug-resistant tuberculosis without HIV infection: success with individualized therapy. *Int J Tuberc Lung Dis* 2006; **10**: 409–14.
33. Folkvardsen DB, Norman A, Rasmussen EM, *et al.* Recurrent tuberculosis in patients infected with the predominant Mycobacterium tuberculosis outbreak strain in Denmark. New insights gained through whole genome sequencing. *Infect Genet Evol J Mol Epidemiol Evol Genet Infect Dis* 2020;**80**:104169. doi:10.1016/j.meegid.2020.104169
34. Gelmanova IY, Ahmad Khan F, Becerra MC, *et al.* Low rates of recurrence after successful treatment of multidrug-resistant tuberculosis in Tomsk, Russia. *Int J Tuberc Lung Dis* 2015; **19**: 399–405.
35. Gengiah TN, Botha JH, Soowamber D, Naidoo K, Karim SSA. Original Article Low rifampicin concentrations in tuberculosis patients with HIV infection. *J Infect Dev Ctries* 2014; **8**: 987-93.
36. Gonzales Montaner D. Rifabutin for the treatment of newly-diagnosed pulmonary tuberculosis: a multinational , randomized , comparative study versus Rifampicin. *Tuberc Lung Dis* 1994; **75**: 341-7.
37. Guglielmetti L, Jaspard M, Dû D Le, *et al.* Long-term outcome and safety of prolonged bedaquiline treatment for multidrug-resistant tuberculosis. *Eur Respir J* 2017. DOI:10.1183/13993003.01799-2016.
38. He GX, Xie YG, Wang LX, *et al.* Follow-up of patients with multidrug resistant tuberculosis four years after standardized first-line drug treatment. *PLoS One* 2010; **5**: e10799.
39. Hesseling AC, Walzl G, Enarson DA, *et al.* Baseline sputum time to detection predicts month two culture conversion and relapse in non-HIV-infected patients. *Int J Tuberc Lung Dis* 2010; **14**: 560–70.
40. Hong YP, Kim SC, Chang SC, Kim SJ, Jin BW, Park CD. Comparison of a daily and three intermittent retreatment regimens for pulmonary tuberculosis administered under programme conditions. *Tubercle* 1988; **69**: 241–53.
41. Jasmer RM, Seaman CB, Gonzalez LC, Kawamura LM, Osmond DH, Daley CL. Tuberculosis treatment outcomes: Directly observed therapy compared with self-administered therapy. *Am J Respir Crit Care Med* 2004; **170**: 561–6.
42. Johnson JL, Ssekasanvu E, Okwera A, *et al.* Randomized trial of adjunctive interleukin-2 in adults with pulmonary tuberculosis. *Am J Respir Crit Care Med* 2003; **168**: 185–91.
43. Karagöz T, Moçlın ÖY, Pazarlı P, *et al.* The treatment results of patients with multidrug resistant tuberculosis and factors affecting treatment outcome. *Tuberc Toraks* 2009; **57**: 383–92.
44. Kim S, Lee H, Park HY, *et al.* Outcomes of pulmonary tuberculosis in patients with discordant phenotypic isoniazid resistance testing. *Respir Med* 2017; **133**: 6–11.
45. Kohno S, Koga H, Kaku M, *et al.* Prospective comparative study of ofloxacin or ethambutol for the treatment of pulmonary tuberculosis. *Chest* 1992; **102**: 1815–8.
46. Kong H, Service C, Medical B. Controlled Trial of 2, 4, and 6 Months of Pyrazinamide in 6-Month, Three-Times-Weekly Regimens for Smear-positive Pulmonary Tuberculosis, Including an Assessment of a Combined Preparation of Isoniazid, Rifampin and pyrazinamide. Results at 30 months. Hong Kong Chest Service/British Medical Research Council. *Am Rev Respir Dis* 1990; **143**: 1–7.
47. Kuaban C, Noeske J, Rieder HL, *et al.* High effectiveness of a 12-month regimen for MDR-TB patients in Cameroon. *Int J Tuberc Lung Dis* 2015; **19**: 517–24.
48. Lan NTN, Lien HTK, Tung LB, *et al.* Mycobacterium tuberculosis Beijing Genotype and Risk for Treatment Failure and Relapse, Vietnam. *Emerg Infect Dis* 2003;**9**:1633–5. doi:10.3201/eid0912.030169
49. Lawal I, Fourie B, Mathebula M, *et al.* FDG-PET/CT as a non invasive biomarker for assessing adequacy of treatment and predicting relapse in patients treated for pulmonary tuberculosis. *J Nucl Med* 2019; DOI:10.2967/jnumed.119.233783.
50. Lee H, Jeong B-H, Park HY, *et al.* Treatment Outcomes with Fluoroquinolone-Containing Regimens for Isoniazid-Resistant Pulmonary Tuberculosis. *Antimicrob Agents Chemother* 2015;**60**:471–7. doi:10.1128/AAC.01377-15
51. Lee H, Sohn JW, Sim YS, *et al.* Outcomes of extended duration therapy for drug-susceptible cavitary pulmonary tuberculosis. *Ann Transl Med* 2020;**8**:346. doi:10.21037/atm.2020.02.104
52. Lee J, Lim H-J, Cho Y-J, *et al.* Recurrence after successful treatment among patients with multidrug-resistant tuberculosis. *Int J Tuberc Lung Dis* 2011; **15**: 1331–3.
53. Lee M, Lee J, Carroll MW, *et al.* Linezolid for treatment of chronic extensively drug-resistant tuberculosis. *N Engl J Med* 2012; **367**: 1508–18.
54. Lourenço MCS, Grinsztejn B, Fandinho-Montes FCO, Da Silva MG, Saad MHF, Fonseca LS. Genotypic patterns of multiple isolates of M. tuberculosis from tuberculous HIV patients. *Trop Med Int Heal* 2000; **5**: 488–94.
55. Malherbe ST, Chen RY, Dupont P, *et al.* Quantitative 18F-FDG PET-CT scan characteristics correlate with tuberculosis treatment response. *EJNMMI Res* 2020;**10**:8. doi:10.1186/s13550-020-0591-9
56. Martinez FD, Hernandez HM. Relapse after short-course chemotherapy of patients with sputum smear-positive pulmonary tuberculosis under routine conditions with additional information on side effects and contact tracing. *Tuberc Lung Dis* 1996; **77**: 425–8.
57. Mathur N, Chatla C, Syed S, *et al.* Prospective 1-year follow-up study of all cured, new sputum smear positive tuberculosis patients under the Revised National Tuberculosis Control Program in Hyderabad, Telangana State, India. *Lung India* 2019;**36**:519–24. doi:10.4103/lungindia.lungindia\_143\_19
58. Maug AKJ, Hossain MA, Gumusboga M, *et al.* First-line tuberculosis treatment with double-dose rifampicin is well tolerated. *Int J Tuberc lung Dis Off J Int Union against Tuberc Lung Dis* 2020;**24**:499–505. doi:10.5588/ijtld.19.0063
59. McGreevy J. Outcomes of HIV-infected patients treated for recurrent tuberculosis with the standard retreatment regimen. *Int J Tuberc Lung Dis* 2012; **16**: 841–5.
60. Migliori GB, Espinal M, Danilova ID, *et al.* Frequency of recurrence among MDR-TB cases ‘successfully’ treated with standardised short-course chemotherapy. *Int J Tuberc Lung Dis* 2002; **6**: 858–64.
61. Miles SH, Maat RB. A successful supervised outpatient short-course tuberculosis treatment program in an open refugee camp on the Thai-Cambodian border. *Am Rev Respir Dis* 1984;**130**:827–30. doi:10.1164/arrd.1984.130.5.827
62. Mohanty KC, Dhangay MD. Controlled Trial of Ciprofloxacin in Short-term Chemotherapy for Pulmonary Tuberculosis. *Chest* 1993, **104**: 1194-8.
63. Moosazadeh M, Bahrapour A, Nasehi M, *et al.* The incidence of recurrence of tuberculosis and its related factors in smear-positive pulmonary tuberculosis patients in Iran: A retrospective cohort study. *Lung India* 2015; **32**: 557–60.
64. Narayanan S, Swaminathan S, Supply P, *et al.* Impact of HIV infection on the recurrence of tuberculosis in South India. *J Infect Dis* 2010; **201**: 691–703.

65. No authors listed. Controlled clinical trial of four short-course regimens of chemotherapy for two durations in the treatment of pulmonary tuberculosis. Second report. Third East African/British Medical Research Council Study. *Tubercle* 1980; **61**: 59–69.
66. No authors listed. Controlled Clinical Trial of Levamisole in Short-course Chemotherapy for Pulmonary Tuberculosis. *Am Rev Respir Dis* 1989; **140**: 990–5
67. No authors listed. Controlled Clinical Trial of Two 6-Month Regimens of Chemotherapy in the Treatment of Pulmonary Tuberculosis. Tanzania/British Medical Research Council study. *Am Rev Respir Dis* 1985; **131**: 727–31.
68. No authors listed. Ethambutol plus isoniazid for the treatment of tuberculosis – a controlled trial of four. *Tubercle* 1981; **61**: 13–29.
69. No authors listed. Evaluation of a non-rifampicin continuation phase (6HE) following thrice-weekly intensive phase for the treatment of new sputum positive pulmonary tuberculosis. *Indian J Tuberc* 2007; **54**: 84–90
70. No authors listed. Report S. Controlled Clinical Trial of Five Short-Course ( 4-Month ) Chemotherapy Regimens in Pulmonary Tuberculosis Second Report of the 4th Study. *Am Rev Respir Dis* 1980; **123**: 165–70.
71. Nolan CM, Goldberg S V. Treatment of isoniazid-resistant tuberculosis with isoniazid , rifampin , ethambutol , and pyrazinamide for 6 months. 2002; **6**: 952–8.
72. Ormerod LP, Horsfield N, Green RM. Tuberculosis treatment outcome monitoring : Blackburn 1988 – 2000 SUMMARY. 2002; **6**: 662–5.
73. Palmero DJ, Ambroggi M, Brea A, *et al*. Treatment and follow-up of HIV-negative multidrug-resistant tuberculosis patients in an infectious diseases reference hospital, Buenos Aires, Argentina. *Int J Tuberc Lung Dis* 2004; **8**: 778–84.
74. Pandey P, Bhatnagar AK, Mohan A, Sachdeva KS, Samantaray JC, Guleria R, *et al*. Mycobacterium tuberculosis polyclonal infections through treatment and recurrence. *PLoS One*. 2020;15(8):e0237345.
75. Park DW, Chung SJ, Yeo Y, *et al*. Therapeutic issues with, and long-term outcomes of, pulmonary mycobacterial tuberculosis treatment in patients with autoimmune rheumatic diseases. *J Thorac Dis* 2019;11:4573–82. doi:10.21037/jtd.2019.10.74
76. Parvaresh L, Crighton T, Martinez E, Bustamante A, Chen S, Sintchenko V. Recurrence of tuberculosis in a low-incidence setting: a retrospective cross-sectional study augmented by whole genome sequencing. *BMC Infect Dis* 2018; **18**: 265.
77. Peetluk LS, Rebeiro PF, Cordeiro-Santos M, *et al*. Lack of Weight Gain During the First 2 Months of Treatment and Human Immunodeficiency Virus Independently Predict Unsuccessful Treatment Outcomes in Tuberculosis. *J Infect Dis* 2020;221:1416–24. doi:10.1093/infdis/jiz595
78. Perez Guzman H. Results of a 12-month regimen for drug-resistant pulmonary tuberculosis. *Int J Tuberc Lung Dis* 2002; **6**: 1102–9.
79. Piubello A, Harouna SH, Souleymane MB, *et al*. High cure rate with standardised short-course multidrug-resistant tuberculosis treatment in Niger: no relapses. *Int J Tuberc Lung Dis* 2014; **18**: 1188–94.
80. Piubello A, Souleymane MB, Hassane-Harouna S, *et al*. Management of multidrug-resistant tuberculosis with shorter treatment regimen in Niger: Nationwide programmatic achievements. *Respir Med* 2020;161:105844. doi:10.1016/j.rmed.2019.105844
81. Prasad R, Verma SK, Sahai S, Kumar S, Jain A, Prasad R. Efficacy and Safety of Kanamycin , Ethionamide , PAS and Cycloserine in Multidrug-resistant Pulmonary Tuberculosis Patients. *Indian J Chest Dis Allied Sci* 2004; **226003**.
82. Prasad R, Verma SK, Shrivastava P, *et al*. A follow up study on revised national tuberculosis control programme (rntcp): results from a single centre study. *Lung India* 2008; **25**: 142–4.
83. Qiu B, Tao B, Liu Q, Li Z, Song H, Tian D, *et al*. A Prospective Cohort Study on the Prevalent and Recurrent Tuberculosis Isolates Using the MIRU-VNTR Typing. *Front Med [Internet]*. 2021 Sep 14;8:685368. Available from: <https://pubmed.ncbi.nlm.nih.gov/34595184/>
84. Rao VG, Muniyandi M, Sharma RK, Yadav R, Bhat J. Long-term survival of patients treated for tuberculosis: a population-based longitudinal study in a resource-poor setting. *Trop Med Int Heal [Internet]*. 2021 Sep 19;26(9):1110–6. Available from: <https://pubmed.ncbi.nlm.nih.gov/34109699/>
85. Reis FJ, Bedran MBM, Moura JAR, Assis I, Rodrigues MESM. Six-Month Isoniazid-Rifampin Treatment for Pulmonary Tuberculosis in Children. *Am Rev Resp Dis* 1990; **142**: 1–4.
86. Schirotti C, Carugati M, Zanini F, *et al*. Exogenous reinfection of tuberculosis in a low-burden area. *Infection* 2015; **43**: 647–53.
87. Schoenbaechler V, Guilavogui Y, Onivogui S, Hébélamou J, Mugglin C, Furrer H, *et al*. Rate of treatment success and associated factors in the program for drug-susceptible tuberculosis in the Forest Region, Republic of Guinea, 2010-2017: A real-world retrospective observational cohort study. *Int J Infect Dis [Internet]*. 2021 Sep;110:6–14. Available from: <https://pubmed.ncbi.nlm.nih.gov/34118429/>
88. Schwobel V, Trébucq A, Kashongwe Z, *et al*. Outcomes of a nine-month regimen for rifampicin-resistant tuberculosis up to 24 months after treatment completion in nine African countries. *EClinicalMedicine* 2020;20:100268. doi:10.1016/j.eclinm.2020.100268
89. Seon HJ, Kim YI, Lim SC, Kim YH, Kwon YS. Clinical significance of residual lesions in chest computed tomography after anti-tuberculosis treatment. *Int J Tuberc Lung Dis* 2014; **18**: 341–6.
90. Shamputa IC, Van Deun A, Salim MAH, *et al*. Endogenous reactivation and true treatment failure as causes of recurrent tuberculosis in a high incidence setting with a low HIV infection. *Trop Med Int Health* 2007; **12**: 700–8.
91. Shao Y, Song H, Li G, Li Y, Li Y, Zhu L, *et al*. Relapse or Re-Infection, the Situation of Recurrent Tuberculosis in Eastern China. *Front Cell Infect Microbiol [Internet]*. 2021 Mar 17;11:638990. Available from: <https://pubmed.ncbi.nlm.nih.gov/33816342/>
92. Shen G, Xue Z, Shen X, Gui X, Shen M, Mei J. Tuberculosis and Exogenous. *Emerg Infect Dis* 2006; **12**: 11–3.
93. Shin SS, Furin JJ, Alcantara F, *et al*. Long-term follow-up for multidrug-resistant tuberculosis. *Emerg Infect Dis* 2006; **12**: 687–8.
94. Slutkin G, Schechter GF, Hopewell PC. The results of 9-month isoniazid-rifampin therapy for pulmonary tuberculosis under program conditions in San Francisco. *Am Rev Respir Dis* 1988;138:1622–4. doi:10.1164/ajrccm/138.6.1622
95. Snider DE, Graczyk J, Bek E, Rogowski J. Supervised six-months treatment of newly diagnosed pulmonary tuberculosis using isoniazid, rifampin, and pyrazinamide with and without streptomycin. *Am Rev Respir Dis* 1984; **130**: 1091–4.
96. Spagnolo S V, Raver JM. Nine-month chemotherapy for pulmonary tuberculosis. *South Med J* 1982; **75**: 134-137,142.
97. Swaminathan S, Rajasekaran S, Venkatesan P, Kamakoti K, Trust C, Padmapriyadarsini C. Long term follow up of HIV-infected patients with tuberculosis treated with 6-month intermittent short course chemotherapy. *Natl Med India* 2007; **21**: 3-8

98. Tam CM, Chan SL, Kam KM, *et al*. Rifapentine and isoniazid in the continuation phase of a 6-month regimen. Final report at 5 years: prognostic value of various measures. *Int J Tuberc Lung Dis* 2002; **6**: 3–10.
99. Umubyeyi AN, Shamputa IC, Rigouts L, *et al*. Molecular investigation of recurrent tuberculosis in patients from Rwanda. *Int J Tuberc Lung Dis* 2007; **11**: 860–7.
100. Van Deun A, Aung KJ, Salim MA, *et al*. Extension of the intensive phase reduces unfavourable outcomes with the 8-month thioacetazone regimen. *Int J Tuberc Lung Dis* 2006; **10**: 1255–61.
101. Van Deun A, Maug AKJ, Salim MAH, *et al*. Short, highly effective, and inexpensive standardized treatment of multidrug-resistant tuberculosis. *Am J Respir Crit Care Med* 2010; **182**:684–92. doi:10.1164/rccm.201001-0077OC
102. Van Deun A, Salim MA, Das PK, Bastian I, Portaels F. Results of a standardised regimen for multidrug-resistant tuberculosis in Bangladesh. *Int J Tuberc Lung Dis* 2004; **8**: 560–7.
103. van Rie A, Warren R, Richardson M, *et al*. Exogenous reinfection as a cause of recurrent tuberculosis after curative treatment. *N Engl J Med* 1999; **341**: 1174–9.
104. Velayutham B, Jawahar MS, Nair D, *et al*. 4-month moxifloxacin containing regimens in the treatment of patients with sputum-positive pulmonary tuberculosis in South India - a randomised clinical trial. *Trop Med Int Health* 2020; **25**:483–95. doi:10.1111/tmi.13371
105. Vieira AA, Leite DT, Adreoni S. Tuberculosis recurrence in a priority city in the state of Sao Paulo, Brazil. *J Bras Pneumol* 2017; **43**: 106–12.
106. Xia Y, Goel S, Harries AD, *et al*. Prevalence of extended treatment in pulmonary tuberculosis patients receiving first-line therapy and its association with recurrent tuberculosis in Beijing, China. *Trans R Soc Trop Med Hyg* 2014; **108**: 402–7.
107. Yan L, Kan X, Zhu L, *et al*. Short-course Regimen for Subsequent Treatment of Pulmonary Tuberculosis: A Prospective, Randomized, Controlled Multicenter Clinical Trial in China. *Clin Ther* 2018; **40**: 440–9.
108. Yoshiyama T, Morimoto K, Okumura M, *et al*. Long term outcome of multidrug-resistant TB patients in Fukujuji Hospital in Japan. *Trans R Soc Trop Med Hyg* 2014; **108**: 589–90.
109. Yoshiyama T, Shrestha B, Maharjan B. Risk of relapse and failure after retreatment with the Category II regimen in Nepal. *Int J Tuberc Lung Dis* 2010; **14**: 1418–
110. Zheng X-B, Diwan VK, Zhao Q, *et al*. Treatment quality and outcome for multidrug-resistant tuberculosis patients in four regions of China: a cohort study. *Infect Dis poverty* 2020; **9**:97. doi:10.1186/s40249-020-00719-x
